# Supplementary material for: NK-cell Editing Mediates Epithelial-to-Mesenchymal Transition via Phenotypic and Proteomic Changes in Melanoma Cell Lines
Source: Oxford University Press journal article supplement (doi:10.1158/0008-5472.can-17-1891), 2018-05-11
Supplement: 00085472can171891-sup-185333_3_supp_4730411_p849rj.xlsx [file 00085472can171891-sup-185333_3_supp_4730411_p849rj.xlsx]

## Sheet: MeDeBO up Gene Set
GeneAnalytics - Analysis Report
Copyright © LifeMap Sciences, Inc.
	MeDeBO exposed to NK cells Vs Nil (proteins UP)
Species	Human
Identified genes (658)
Symbol	Full Name	Aliases	GeneCards URL
AAK1	AP2 Associated Kinase 1	KIAA1048	http://www.genecards.org/cgi-bin/carddisp.pl?gene=AAK1
AAMDC	Adipogenesis Associated, Mth938 Domain Containing	CK067, PTD015, C11orf67	http://www.genecards.org/cgi-bin/carddisp.pl?gene=AAMDC
AARS	Alanyl-TRNA Synthetase	cytoplasmic, EIEE29, alaRS, CMT2N	http://www.genecards.org/cgi-bin/carddisp.pl?gene=AARS
ABAT	4-Aminobutyrate Aminotransferase	NPD009, GABA-AT, GABAT, GABA-T, L-AIBAT	http://www.genecards.org/cgi-bin/carddisp.pl?gene=ABAT
ABHD5	Abhydrolase Domain Containing 5	CDS, CGI58, IECN2, NCIE2	http://www.genecards.org/cgi-bin/carddisp.pl?gene=ABHD5
ABL2	ABL Proto-Oncogene 2, Non-Receptor Tyrosine Kinase	ABLL, ARG	http://www.genecards.org/cgi-bin/carddisp.pl?gene=ABL2
ACTB	Actin, Beta	BRWS1, PS1TP5BP1, Beta-actin	http://www.genecards.org/cgi-bin/carddisp.pl?gene=ACTB
ADAM9	ADAM Metallopeptidase Domain 9	MCMP, Mltng, CORD9, MDC9, KIAA0021, Meltrin-gamma	http://www.genecards.org/cgi-bin/carddisp.pl?gene=ADAM9
ADAR	Adenosine Deaminase, RNA-Specific	AGS6, DSH, P136, G1P1, IFI4, ADAR1, DRADA, DSRAD, IFI-4, K88DSRBP	http://www.genecards.org/cgi-bin/carddisp.pl?gene=ADAR
ADGRE5	Adhesion G Protein-Coupled Receptor E5	seven-transmembrane, TM7LN1, CD97	http://www.genecards.org/cgi-bin/carddisp.pl?gene=ADGRE5
ADPRHL2	ADP-Ribosylhydrolase Like 2	ARH3	http://www.genecards.org/cgi-bin/carddisp.pl?gene=ADPRHL2
AFAP1	Actin Filament Associated Protein 1	AFAP110, AFAP, AFAP-110	http://www.genecards.org/cgi-bin/carddisp.pl?gene=AFAP1
AFAP1L2	Actin Filament Associated Protein 1 Like 2	KIAA1914, CTB-1144G6.4, CTB-1144G6.6, XB130	http://www.genecards.org/cgi-bin/carddisp.pl?gene=AFAP1L2
AFF4	AF4/FMR2 Family Member 4	CHOPS, AF5Q31, MCEF	http://www.genecards.org/cgi-bin/carddisp.pl?gene=AFF4
AFTPH	Aftiphilin	aftiphilin, Nbla10388, AFTH	http://www.genecards.org/cgi-bin/carddisp.pl?gene=AFTPH
AHNAK	AHNAK Nucleoprotein	desmoyokin, AHNAK-related, AHNAKRS, PM227	http://www.genecards.org/cgi-bin/carddisp.pl?gene=AHNAK
AK2	Adenylate Kinase 2	ADK2	http://www.genecards.org/cgi-bin/carddisp.pl?gene=AK2
AKAP2	A-Kinase Anchoring Protein 2	AKAPKL, PRKA2, AKAP-2, AKAP-KL, KIAA0920	http://www.genecards.org/cgi-bin/carddisp.pl?gene=AKAP2
ALCAM	Activated Leukocyte Cell Adhesion Molecule	CD166, MEMD	http://www.genecards.org/cgi-bin/carddisp.pl?gene=ALCAM
ALDH1L1	Aldehyde Dehydrogenase 1 Family Member L1	FDH, 10-fTHF, FTHFD, 10-FTHFDH, MER57B-ALDH1L1	http://www.genecards.org/cgi-bin/carddisp.pl?gene=ALDH1L1
ALDH1L2	Aldehyde Dehydrogenase 1 Family Member L2	mtFDH	http://www.genecards.org/cgi-bin/carddisp.pl?gene=ALDH1L2
ANGPTL4	Angiopoietin Like 4	Arp4, hARP, FIAF, NL2, TGQTL, UNQ171, pp1158, HFARP, PGAR	http://www.genecards.org/cgi-bin/carddisp.pl?gene=ANGPTL4
ANKLE2	Ankyrin Repeat And LEM Domain Containing 2	KIAA0692, LEMD7, Lem4, MCPH16	http://www.genecards.org/cgi-bin/carddisp.pl?gene=ANKLE2
ANXA1	Annexin A1	annexin-1, calpactin-2, chromobindin-9, ANX1, LPC1, p35	http://www.genecards.org/cgi-bin/carddisp.pl?gene=ANXA1
AP1S1	Adaptor Related Protein Complex 1 Sigma 1 Subunit	sigma1A-adaptin, MEDNIK, SIGMA1A, EKV3, CLAPS1, AP19	http://www.genecards.org/cgi-bin/carddisp.pl?gene=AP1S1
APC	Adenomatous Polyposis Coli	BTPS2, DP2, DP3, GS, PPP1R46, DP2.5	http://www.genecards.org/cgi-bin/carddisp.pl?gene=APC
APOC3	Apolipoprotein C3	APOCIII, HALP2, apo-CIII, apoC-III	http://www.genecards.org/cgi-bin/carddisp.pl?gene=APOC3
APOL2	Apolipoprotein L2	APOL-II, APOL3	http://www.genecards.org/cgi-bin/carddisp.pl?gene=APOL2
ARFGAP3	ADP Ribosylation Factor GTPase Activating Protein 3	ARFGAP1	http://www.genecards.org/cgi-bin/carddisp.pl?gene=ARFGAP3
ARFIP1	ADP Ribosylation Factor Interacting Protein 1	HSU52521	http://www.genecards.org/cgi-bin/carddisp.pl?gene=ARFIP1
ARHGEF11	Rho Guanine Nucleotide Exchange Factor 11	GTRAP48, PDZ-RHOGEF, KIAA0380	http://www.genecards.org/cgi-bin/carddisp.pl?gene=ARHGEF11
ARHGEF12	Rho Guanine Nucleotide Exchange Factor 12	KIAA0382, LARG, PRO2792	http://www.genecards.org/cgi-bin/carddisp.pl?gene=ARHGEF12
ARHGEF2	Rho/Rac Guanine Nucleotide Exchange Factor 2	GEF, GEFH1, GEF-H1, LFP40, KIAA0651, P40	http://www.genecards.org/cgi-bin/carddisp.pl?gene=ARHGEF2
ARL15	ADP Ribosylation Factor Like GTPase 15	ARFRP2	http://www.genecards.org/cgi-bin/carddisp.pl?gene=ARL15
ARMCX3	Armadillo Repeat Containing, X-Linked 3	1200004E24Rik, GASP6, dJ545K15.2, ALEX3	http://www.genecards.org/cgi-bin/carddisp.pl?gene=ARMCX3
ATAD3B	ATPase Family, AAA Domain Containing 3B	AAA-TOB3, TOB3, KIAA1273	http://www.genecards.org/cgi-bin/carddisp.pl?gene=ATAD3B
ATF6	Activating Transcription Factor 6	ACHM7, ATF6A, ATF6-alpha	http://www.genecards.org/cgi-bin/carddisp.pl?gene=ATF6
ATG5	Autophagy Related 5	ASP, APG5, APG5-LIKE, hAPG5, APG5L	http://www.genecards.org/cgi-bin/carddisp.pl?gene=ATG5
ATP2B1	ATPase Plasma Membrane Ca2+ Transporting 1	PMCA1kb, PMCA1	http://www.genecards.org/cgi-bin/carddisp.pl?gene=ATP2B1
ATP5I	ATP Synthase, H+ Transporting, Mitochondrial Fo Complex Subunit E	ATP5K	http://www.genecards.org/cgi-bin/carddisp.pl?gene=ATP5I
ATP6V0A4	ATPase H+ Transporting V0 Subunit A4	A4, Stv1, Vph1, RDRTA2, RTADR, VPP2, RTA1C, ATP6N1B, ATP6N2	http://www.genecards.org/cgi-bin/carddisp.pl?gene=ATP6V0A4
ATP7A	ATPase Copper Transporting Alpha	DSMAX, MK, SMAX3, MNK, MC1	http://www.genecards.org/cgi-bin/carddisp.pl?gene=ATP7A
ATPIF1	ATPase Inhibitory Factor 1	ATPIP, IP, ATPI, IF(1), IF1	http://www.genecards.org/cgi-bin/carddisp.pl?gene=ATPIF1
ATXN1	Ataxin 1	ATX1, D6S504E, SCA1	http://www.genecards.org/cgi-bin/carddisp.pl?gene=ATXN1
ATXN2L	Ataxin 2 Like	A2D, A2LG, A2LP, A2RP	http://www.genecards.org/cgi-bin/carddisp.pl?gene=ATXN2L
ATXN3	Ataxin 3	AT3, JOS, josephin, MJD, SCA3, ATX3, MJD1	http://www.genecards.org/cgi-bin/carddisp.pl?gene=ATXN3
BACH1	BTB Domain And CNC Homolog 1	BACH-1, BTBD24, HA2303	http://www.genecards.org/cgi-bin/carddisp.pl?gene=BACH1
BAD	BCL2 Associated Agonist Of Cell Death	BBC2, bcl2-L-8, BCL2L8, BBC6	http://www.genecards.org/cgi-bin/carddisp.pl?gene=BAD
BAG3	BCL2 Associated Athanogene 3	CAIR-1, MFM6, BAG-3, BIS	http://www.genecards.org/cgi-bin/carddisp.pl?gene=BAG3
BAZ1A	Bromodomain Adjacent To Zinc Finger Domain 1A	WALp1, ACF1, WCRF180, hACF1, hWALp1	http://www.genecards.org/cgi-bin/carddisp.pl?gene=BAZ1A
BCKDK	Branched Chain Ketoacid Dehydrogenase Kinase	BCKDKD, BDK, BCKD-kinase, BCKDHKIN	http://www.genecards.org/cgi-bin/carddisp.pl?gene=BCKDK
BHLHE40	Basic Helix-Loop-Helix Family Member E40	HLHB2, Stra14, BHLHB2, STRA13, DEC1, SHARP-2, SHARP2, bHLHe40	http://www.genecards.org/cgi-bin/carddisp.pl?gene=BHLHE40
BLOC1S3	Biogenesis Of Lysosomal Organelles Complex 1 Subunit 3	HPS8, RP, BLOS3	http://www.genecards.org/cgi-bin/carddisp.pl?gene=BLOC1S3
BLOC1S5-TXNDC5	BLOC1S5-TXNDC5 Readthrough (NMD Candidate)	MUTED-TXNDC5	http://www.genecards.org/cgi-bin/carddisp.pl?gene=BLOC1S5-TXNDC5
BNIP3	BCL2/Adenovirus E1B 19kDa Interacting Protein 3	NIP3	http://www.genecards.org/cgi-bin/carddisp.pl?gene=BNIP3
BORCS7-ASMT	BORCS7-ASMT Readthrough (NMD Candidate)	C10orf32-AS3MT, C10orf32-ASMT	http://www.genecards.org/cgi-bin/carddisp.pl?gene=BORCS7-ASMT
C12orf57	Chromosome 12 Open Reading Frame 57	GRCC10, C10	http://www.genecards.org/cgi-bin/carddisp.pl?gene=C12orf57
C15orf40	Chromosome 15 Open Reading Frame 40		http://www.genecards.org/cgi-bin/carddisp.pl?gene=C15orf40
C15orf52	Chromosome 15 Open Reading Frame 52		http://www.genecards.org/cgi-bin/carddisp.pl?gene=C15orf52
C19orf66	Chromosome 19 Open Reading Frame 66	RyDEN	http://www.genecards.org/cgi-bin/carddisp.pl?gene=C19orf66
C1orf198	Chromosome 1 Open Reading Frame 198		http://www.genecards.org/cgi-bin/carddisp.pl?gene=C1orf198
CADM1	Cell Adhesion Molecule 1	BL2, Necl-2, RA175, ST17, sTSLC-1, sgIGSF, synCAM1, IGSF4, TSLC1, IGSF4A, NECL2, SYNCAM, TSLC-1	http://www.genecards.org/cgi-bin/carddisp.pl?gene=CADM1
CALB2	Calbindin 2	calretinin, CAL2, CAB29, CR	http://www.genecards.org/cgi-bin/carddisp.pl?gene=CALB2
CALCOCO1	Calcium Binding And Coiled-Coil Domain 1	Cocoa, PP13275, calphoglin, KIAA1536	http://www.genecards.org/cgi-bin/carddisp.pl?gene=CALCOCO1
CALCOCO2	Calcium Binding And Coiled-Coil Domain 2	NDP52	http://www.genecards.org/cgi-bin/carddisp.pl?gene=CALCOCO2
CALM2	Calmodulin 2 (Phosphorylase Kinase, Delta)	PHKD, caM, CALML2, CALM, CAM1, CAM2, CAM3, CAMB, CAMC, CAMIII, CAMII, LQT15, PHKD2	http://www.genecards.org/cgi-bin/carddisp.pl?gene=CALM2
CAPS	Calcyphosine	CAPS1, calcyphosine	http://www.genecards.org/cgi-bin/carddisp.pl?gene=CAPS
CARS	Cysteinyl-TRNA Synthetase	cytoplasmic, CARS1, CYSRS, MGC:11246	http://www.genecards.org/cgi-bin/carddisp.pl?gene=CARS
CASP4	Caspase 4	ICE(rel)II, ICEREL-II, Mih1/TX, TX, CASP-4, ICE(rel)-II, ICH-2, Mih1, ICH2	http://www.genecards.org/cgi-bin/carddisp.pl?gene=CASP4
CASP7	Caspase 7	LICE2, CASP-7, CMH-1, ICE-LAP3, MCH3	http://www.genecards.org/cgi-bin/carddisp.pl?gene=CASP7
CBR3	Carbonyl Reductase 3	HEL-S-25, SDR21C2, hCBR3	http://www.genecards.org/cgi-bin/carddisp.pl?gene=CBR3
CBS	Cystathionine-Beta-Synthase	cystathionine-beta-synthase, HIP4, beta-thionase	http://www.genecards.org/cgi-bin/carddisp.pl?gene=CBS
CBX6	Chromobox 6		http://www.genecards.org/cgi-bin/carddisp.pl?gene=CBX6
CCDC58	Coiled-Coil Domain Containing 58		http://www.genecards.org/cgi-bin/carddisp.pl?gene=CCDC58
CCDC9	Coiled-Coil Domain Containing 9		http://www.genecards.org/cgi-bin/carddisp.pl?gene=CCDC9
CCDC90B	Coiled-Coil Domain Containing 90B	MDS011, MDS025	http://www.genecards.org/cgi-bin/carddisp.pl?gene=CCDC90B
CCPG1	Cell Cycle Progression 1	CPR8, CCP8, KIAA1254	http://www.genecards.org/cgi-bin/carddisp.pl?gene=CCPG1
CCZ1	CCZ1 Homolog, Vacuolar Protein Trafficking And Biogenesis Associated	CGI-43, H_DJ1163J12.2, H_NH0577018.2, C7orf28A, CCZ1A	http://www.genecards.org/cgi-bin/carddisp.pl?gene=CCZ1
CD40	CD40 Molecule	P50, CDW40, TNFRSF5, Bp50	http://www.genecards.org/cgi-bin/carddisp.pl?gene=CD40
CD44	CD44 Molecule (Indian Blood Group)	CDW44, CSPG8, HCELL, IN, MC56, Pgp1, epican, MDU2, MDU3, MIC4, ECMR-III, HUTCH-I, LHR, PGP-1, PGP-I	http://www.genecards.org/cgi-bin/carddisp.pl?gene=CD44
CD46	CD46 Molecule	MCP, AHUS2, TRA2.10, MIC10, TLX	http://www.genecards.org/cgi-bin/carddisp.pl?gene=CD46
CD47	CD47 Molecule	IAP, OA3, MER6	http://www.genecards.org/cgi-bin/carddisp.pl?gene=CD47
CD55	CD55 Molecule (Cromer Blood Group)	CR, CROM, TC, DAF	http://www.genecards.org/cgi-bin/carddisp.pl?gene=CD55
CD58	CD58 Molecule	AG3, LFA-3, LFA3	http://www.genecards.org/cgi-bin/carddisp.pl?gene=CD58
CD74	CD74 Molecule	p33, HLA-DR-gamma, HLADG, II, Ia-GAMMA, DHLAG	http://www.genecards.org/cgi-bin/carddisp.pl?gene=CD74
CDC123	Cell Division Cycle 123	C10orf7, D123, HT-1080, PZ32	http://www.genecards.org/cgi-bin/carddisp.pl?gene=CDC123
CDC37	Cell Division Cycle 37	homolog), P50CDC37, CDC37A	http://www.genecards.org/cgi-bin/carddisp.pl?gene=CDC37
CDC42BPA	CDC42 Binding Protein Kinase Alpha	MRCK, MRCKA, PK428, KIAA0451	http://www.genecards.org/cgi-bin/carddisp.pl?gene=CDC42BPA
CDCA5	Cell Division Cycle Associated 5	SORORIN, p35	http://www.genecards.org/cgi-bin/carddisp.pl?gene=CDCA5
CDH19	Cadherin 19	CDH7, CDH7L2	http://www.genecards.org/cgi-bin/carddisp.pl?gene=CDH19
CDH2	Cadherin 2	N-cadherin, CD325, NCAD, CDHN, CDw325	http://www.genecards.org/cgi-bin/carddisp.pl?gene=CDH2
CDK2AP1	Cyclin-Dependent Kinase 2 Associated Protein 1	DOC1, DORC1, ST19, doc-1, p12DOC-1, CDKAP1	http://www.genecards.org/cgi-bin/carddisp.pl?gene=CDK2AP1
CDKN2AIPNL	CDKN2A Interacting Protein N-Terminal Like		http://www.genecards.org/cgi-bin/carddisp.pl?gene=CDKN2AIPNL
CDV3	CDV3 Homolog	H41	http://www.genecards.org/cgi-bin/carddisp.pl?gene=CDV3
CEBPB	CCAAT/Enhancer Binding Protein Beta	LAP, C/EBP-beta, IL6DBP, NF-IL6, TCF5, LIP, TCF-5	http://www.genecards.org/cgi-bin/carddisp.pl?gene=CEBPB
CENPF	Centromere Protein F	mitosin, CENF, CILD31, PRO1779, STROMS, CENP-F, hcp-1	http://www.genecards.org/cgi-bin/carddisp.pl?gene=CENPF
CEP131	Centrosomal Protein 131	ZA1, AZI1, AZ1, KIAA1118	http://www.genecards.org/cgi-bin/carddisp.pl?gene=CEP131
CEP250	Centrosomal Protein 250	C-NAP1, CNAP1, Cep250, CEP2	http://www.genecards.org/cgi-bin/carddisp.pl?gene=CEP250
CEP41	Centrosomal Protein 41	JBTS15, TSGA14, Cep41	http://www.genecards.org/cgi-bin/carddisp.pl?gene=CEP41
CFAP36	Cilia And Flagella Associated Protein 36	CCDC104	http://www.genecards.org/cgi-bin/carddisp.pl?gene=CFAP36
CHL1	Cell Adhesion Molecule L1 Like	L1CAM2, CALL	http://www.genecards.org/cgi-bin/carddisp.pl?gene=CHL1
CHMP1A	Charged Multivesicular Body Protein 1A	PCH8, VPS46-1, VPS46A, PCOLN3, PRSM1, CHMP1, CHMP1a, KIAA0047, hVps46-1	http://www.genecards.org/cgi-bin/carddisp.pl?gene=CHMP1A
CHMP1B	Charged Multivesicular Body Protein 1B	C10orf2, C18-ORF2, Vps46B, C18orf2, CHMP1.5, Vps46-2, hVps46-2, CHMP1b	http://www.genecards.org/cgi-bin/carddisp.pl?gene=CHMP1B
CHMP4A	Charged Multivesicular Body Protein 4A	CHMP4, CHMP4B, HSPC134, SNF7, VPS32-1, VPS32A, C14orf123, SHAX2, SNF7-1, CHMP4a, hSnf-1, hVps32-1	http://www.genecards.org/cgi-bin/carddisp.pl?gene=CHMP4A
CHURC1-FNTB	CHURC1-FNTB Readthrough		http://www.genecards.org/cgi-bin/carddisp.pl?gene=CHURC1-FNTB
CLCN5	Chloride Voltage-Gated Channel 5	CLC5, DENTS, XLRH, XRN, hCIC-K2, NPHL1, NPHL2, CLCK2, ClC-5	http://www.genecards.org/cgi-bin/carddisp.pl?gene=CLCN5
CLIP2	CAP-Gly Domain Containing Linker Protein 2	CLIP, WSCR3, CYLN2, WBSCR3, WBSCR4, CLIP-115, WSCR4, KIAA0291	http://www.genecards.org/cgi-bin/carddisp.pl?gene=CLIP2
CMBL	Carboxymethylenebutenolidase Homolog (Pseudomonas)	JS-1	http://www.genecards.org/cgi-bin/carddisp.pl?gene=CMBL
CMC4	C-X(9)-C Motif Containing 4	MTCP1B, p8, MTCP1, MTCP1NB, C6.1B, p8MTCP1	http://www.genecards.org/cgi-bin/carddisp.pl?gene=CMC4
CMPK2	Cytidine/Uridine Monophosphate Kinase 2	NDK, TMPK2, TYKi, UMP-CMPK2	http://www.genecards.org/cgi-bin/carddisp.pl?gene=CMPK2
CNBP	CCHC-Type Zinc Finger Nucleic Acid Binding Protein	CNBP1, PROMM, ZCCHC22, DM2, ZNF9, RNF163	http://www.genecards.org/cgi-bin/carddisp.pl?gene=CNBP
CNN2	Calponin 2		http://www.genecards.org/cgi-bin/carddisp.pl?gene=CNN2
CNN3	Calponin 3		http://www.genecards.org/cgi-bin/carddisp.pl?gene=CNN3
CNNM4	Cyclin And CBS Domain Divalent Metal Cation Transport Mediator 4	cyclin-M4, ACDP4, KIAA1592	http://www.genecards.org/cgi-bin/carddisp.pl?gene=CNNM4
CNOT9	CCR4-NOT Transcription Complex Subunit 9	CAF40, CT129, RCD-1, RQCD1, RCD1	http://www.genecards.org/cgi-bin/carddisp.pl?gene=CNOT9
COBLL1	Cordon-Bleu WH2 Repeat Protein Like 1	COBLR1, KIAA0977	http://www.genecards.org/cgi-bin/carddisp.pl?gene=COBLL1
COG3	Component Of Oligomeric Golgi Complex 3	p94, SEC34	http://www.genecards.org/cgi-bin/carddisp.pl?gene=COG3
CORO1A	Coronin 1A	CLABP, CLIPINA, HCORO1, IMD8, clipin-A, p57, coronin-1, TACO, CORO1	http://www.genecards.org/cgi-bin/carddisp.pl?gene=CORO1A
CPT1A	Carnitine Palmitoyltransferase 1A	CPT1, L-CPT1, CPT1-L, CPTI-L	http://www.genecards.org/cgi-bin/carddisp.pl?gene=CPT1A
CREBBP	CREB Binding Protein	KAT3A, RSTS, CBP	http://www.genecards.org/cgi-bin/carddisp.pl?gene=CREBBP
CRIP2	Cysteine Rich Protein 2	ESP1, CRIP, CRP2, CRP-2	http://www.genecards.org/cgi-bin/carddisp.pl?gene=CRIP2
CRLF3	Cytokine Receptor Like Factor 3	FRWS, p48.2, CREME-9, CREME9, CRLM9, CYTOR4, P48	http://www.genecards.org/cgi-bin/carddisp.pl?gene=CRLF3
CSRP1	Cysteine And Glycine Rich Protein 1	D1S181E, HEL-S-286, CYRP, CRP, CSRP, HEL-141, CRP1	http://www.genecards.org/cgi-bin/carddisp.pl?gene=CSRP1
CSRP2	Cysteine And Glycine Rich Protein 2	CRP2, LMO-5, LMO5, SmLIM	http://www.genecards.org/cgi-bin/carddisp.pl?gene=CSRP2
CST7	Cystatin F	leukocystatin, cystatin-7, CMAP	http://www.genecards.org/cgi-bin/carddisp.pl?gene=CST7
CTAGE5	CTAGE Family Member 5	MGEA, MGEA6, MEA6, MGEA11, MEA11	http://www.genecards.org/cgi-bin/carddisp.pl?gene=CTAGE5
CTIF	CBP80/20-Dependent Translation Initiation Factor	KIAA0427, Gm672	http://www.genecards.org/cgi-bin/carddisp.pl?gene=CTIF
CTSS	Cathepsin S		http://www.genecards.org/cgi-bin/carddisp.pl?gene=CTSS
CXCL8	C-X-C Motif Chemokine Ligand 8	NAP1, LUCT, LYNAP, NAF, emoctakin, IL8, GCP-1, GCP1, LECT, MDNCF, MONAP, NAP-1, IL-8	http://www.genecards.org/cgi-bin/carddisp.pl?gene=CXCL8
DCAF8	DDB1 And CUL4 Associated Factor 8	GAN2, WDR42A, H326	http://www.genecards.org/cgi-bin/carddisp.pl?gene=DCAF8
DDAH1	Dimethylarginine Dimethylaminohydrolase 1	HEL-S-16, dimethylargininase-1, DDAH, DDAH-1, DDAHI	http://www.genecards.org/cgi-bin/carddisp.pl?gene=DDAH1
DDX24	DEAD-Box Helicase 24		http://www.genecards.org/cgi-bin/carddisp.pl?gene=DDX24
DDX46	DEAD-Box Helicase 46	PRPF5, Prp5, KIAA0801	http://www.genecards.org/cgi-bin/carddisp.pl?gene=DDX46
DENR	Density-Regulated Protein	DRP1, DRP, SMAP-3	http://www.genecards.org/cgi-bin/carddisp.pl?gene=DENR
DNAH8	Dynein Axonemal Heavy Chain 8	ATPase, hdhc9	http://www.genecards.org/cgi-bin/carddisp.pl?gene=DNAH8
DNPEP	Aspartyl Aminopeptidase	ASPEP, DAP	http://www.genecards.org/cgi-bin/carddisp.pl?gene=DNPEP
DRAP1	DR1 Associated Protein 1	NC2-alpha	http://www.genecards.org/cgi-bin/carddisp.pl?gene=DRAP1
DTD1	D-Tyrosyl-TRNA Deacylase 1	pqn-68, C20orf88, HARS2, DUE-B, DUEB	http://www.genecards.org/cgi-bin/carddisp.pl?gene=DTD1
DTX3L	Deltex 3 Like, E3 Ubiquitin Ligase	rhysin-2, rhysin2, BBAP	http://www.genecards.org/cgi-bin/carddisp.pl?gene=DTX3L
ECE1	Endothelin Converting Enzyme 1	ECE, ECE-1	http://www.genecards.org/cgi-bin/carddisp.pl?gene=ECE1
ECHDC1	Ethylmalonyl-CoA Decarboxylase 1	HEL-S-76, dJ351K20.2, MMCD	http://www.genecards.org/cgi-bin/carddisp.pl?gene=ECHDC1
EDF1	Endothelial Differentiation Related Factor 1	CFAP280, EDF-1, MBF1	http://www.genecards.org/cgi-bin/carddisp.pl?gene=EDF1
EEF1D	Eukaryotic Translation Elongation Factor 1 Delta	EF-1-delta, FP1047, EF-1D, EF1D	http://www.genecards.org/cgi-bin/carddisp.pl?gene=EEF1D
EFHD2	EF-Hand Domain Family Member D2	swiprosin-1, SWS1	http://www.genecards.org/cgi-bin/carddisp.pl?gene=EFHD2
EGLN1	Egl-9 Family Hypoxia Inducible Factor 1	ECYT3, HALAH, HIFPH2, HPH2, SM20, ZMYND6, C1orf12, HIF-PH2, HPH-2, PHD2, SM-20	http://www.genecards.org/cgi-bin/carddisp.pl?gene=EGLN1
EIF1AX	Eukaryotic Translation Initiation Factor 1A, X-Linked	EIF1A, EIF1AP1, eIF-1A, EIF4C, eIF-4C	http://www.genecards.org/cgi-bin/carddisp.pl?gene=EIF1AX
EIF2S2	Eukaryotic Translation Initiation Factor 2 Subunit Beta	EIF2B, EIF2, EIF2beta, PPP1R67, eIF-2-beta	http://www.genecards.org/cgi-bin/carddisp.pl?gene=EIF2S2
EIF3J	Eukaryotic Translation Initiation Factor 3 Subunit J	eIF3j, eIF3-alpha, eIF3-p35, EIF3S1, eIF-3-alpha	http://www.genecards.org/cgi-bin/carddisp.pl?gene=EIF3J
EIF4EBP1	Eukaryotic Translation Initiation Factor 4E Binding Protein 1	4EBP1, BP-1, 4E-BP1, PHAS-I	http://www.genecards.org/cgi-bin/carddisp.pl?gene=EIF4EBP1
EIF5A2	Eukaryotic Translation Initiation Factor 5A2	EIF-5A2, eIF5AII, eIF-5A-2	http://www.genecards.org/cgi-bin/carddisp.pl?gene=EIF5A2
EIF6	Eukaryotic Translation Initiation Factor 6	CAB, eIF3a, b(2)gcn, ITGB4BP, p27(BBP), eIF-6, p27BBP	http://www.genecards.org/cgi-bin/carddisp.pl?gene=EIF6
ELMSAN1	ELM2 And Myb/SANT Domain Containing 1	LSR68, c14_5541, C14orf117, C14orf43, MIDEAS	http://www.genecards.org/cgi-bin/carddisp.pl?gene=ELMSAN1
EMC10	ER Membrane Protein Complex Subunit 10	HSS1, C19orf63, HSM1, INM02	http://www.genecards.org/cgi-bin/carddisp.pl?gene=EMC10
EMD	Emerin	emerin, LEMD5, EDMD, STA	http://www.genecards.org/cgi-bin/carddisp.pl?gene=EMD
ENG	Endoglin	endoglin, HHT1, ORW1, END	http://www.genecards.org/cgi-bin/carddisp.pl?gene=ENG
EPS8	Epidermal Growth Factor Receptor Pathway Substrate 8	DFNB102	http://www.genecards.org/cgi-bin/carddisp.pl?gene=EPS8
EVL	Enah/Vasp-Like	Enah/Vasp-like, RNB6	http://www.genecards.org/cgi-bin/carddisp.pl?gene=EVL
EXOC6	Exocyst Complex Component 6	SEC15A, EXOC6A, SEC15, SEC15L3, Sec15p, SEC15L1, SEC15L	http://www.genecards.org/cgi-bin/carddisp.pl?gene=EXOC6
FAM107B	Family With Sequence Similarity 107 Member B	C10orf45	http://www.genecards.org/cgi-bin/carddisp.pl?gene=FAM107B
FAM120B	Family With Sequence Similarity 120B	KIAA1838, dJ894D12.1, CCPG, PGCC1	http://www.genecards.org/cgi-bin/carddisp.pl?gene=FAM120B
FAM127A	Family With Sequence Similarity 127 Member A	MART8C, Mar8, Mart8, CXX1, MAR8C	http://www.genecards.org/cgi-bin/carddisp.pl?gene=FAM127A
FAM129A	Family With Sequence Similarity 129 Member A	GIG39, C1orf24, NIBAN	http://www.genecards.org/cgi-bin/carddisp.pl?gene=FAM129A
FAM210B	Family With Sequence Similarity 210 Member B	C20orf108, dJ1167H4.1, 5A3	http://www.genecards.org/cgi-bin/carddisp.pl?gene=FAM210B
FAM21A	Family With Sequence Similarity 21 Member A	bA56A21.1, FAM21B, bA98I6.1	http://www.genecards.org/cgi-bin/carddisp.pl?gene=FAM21A
FAM3A	Family With Sequence Similarity 3 Member A	DLD, DXS560S, XAP-7, 2.19, 2-19	http://www.genecards.org/cgi-bin/carddisp.pl?gene=FAM3A
FAM3C	Family With Sequence Similarity 3 Member C	GS3786, ILEI	http://www.genecards.org/cgi-bin/carddisp.pl?gene=FAM3C
FAM8A1	Family With Sequence Similarity 8 Member A1	AHCP	http://www.genecards.org/cgi-bin/carddisp.pl?gene=FAM8A1
FAU	Finkel-Biskis-Reilly Murine Sarcoma Virus (FBR-MuSV) Ubiquitously Expressed	FAU1, Fub1, Fubi, MNSFbeta, RPS30, S30, asr1	http://www.genecards.org/cgi-bin/carddisp.pl?gene=FAU
FCHSD1	FCH And Double SH3 Domains 1	NWK2	http://www.genecards.org/cgi-bin/carddisp.pl?gene=FCHSD1
FHL2	Four And A Half LIM Domains 2	AAG11, DRAL, FHL-2, SLIM-3, SLIM3	http://www.genecards.org/cgi-bin/carddisp.pl?gene=FHL2
FKBP5	FK506 Binding Protein 5	P54, PPIASE, rotamase, FKBP51, Ptg-10, AIG6, FKBP-51, FKBP54, FKBP-5	http://www.genecards.org/cgi-bin/carddisp.pl?gene=FKBP5
FLNA	Filamin A	CSBS, ABPX, CVD1, FMD, MNS, NHBP, OPD, XLVD, XMVD, alpha-filamin, filamin-1, OPD1, OPD2, FLN, FLN1, ABP-280, FLN-A	http://www.genecards.org/cgi-bin/carddisp.pl?gene=FLNA
FLNB	Filamin B	AOI, FH1, SCT, beta-filamin, filamin-3, LRS1, FLN1L, ABP-278, FLN-B, TABP, TAP, FLN3, ABP-280	http://www.genecards.org/cgi-bin/carddisp.pl?gene=FLNB
FLNC	Filamin C	ABP-280, ABP280A, ABPA, MFM5, MPD4, filamin-2, FLN2, ABPL, ABP-L, FLN-C, FLNc, Gamma-filamin	http://www.genecards.org/cgi-bin/carddisp.pl?gene=FLNC
FN1	Fibronectin 1	ED-B, FINC, FNZ, GFND, GFND2, LETS, MSF, CIG, FN	http://www.genecards.org/cgi-bin/carddisp.pl?gene=FN1
FNDC3B	Fibronectin Type III Domain Containing 3B	PRO4979, YVTM2421, FAD104, NS5ABP37	http://www.genecards.org/cgi-bin/carddisp.pl?gene=FNDC3B
FOSL1	FOS Like Antigen 1	FRA, fra-1, FRA1	http://www.genecards.org/cgi-bin/carddisp.pl?gene=FOSL1
FOXK2	Forkhead Box K2	FOXK1, ILF-1, ILF, ILF1	http://www.genecards.org/cgi-bin/carddisp.pl?gene=FOXK2
FTH1	Ferritin, Heavy Polypeptide 1	apoferritin, FHC, FTH, HFE5, PIG15, PLIF, FTHL6	http://www.genecards.org/cgi-bin/carddisp.pl?gene=FTH1
FTL	Ferritin, Light Polypeptide	NBIA3, LFTD	http://www.genecards.org/cgi-bin/carddisp.pl?gene=FTL
GAS7	Growth Arrest Specific 7	MLL/GAS7, GAS-7, KIAA0394	http://www.genecards.org/cgi-bin/carddisp.pl?gene=GAS7
GBP1	Guanylate Binding Protein 1	huGBP-1, GBP-1	http://www.genecards.org/cgi-bin/carddisp.pl?gene=GBP1
GBP2	Guanylate Binding Protein 2	GBP-2, HuGBP-2	http://www.genecards.org/cgi-bin/carddisp.pl?gene=GBP2
GCC1	GRIP And Coiled-Coil Domain Containing 1	GCC1P, GCC88	http://www.genecards.org/cgi-bin/carddisp.pl?gene=GCC1
GCC2	GRIP And Coiled-Coil Domain Containing 2	REN53, GCC185, RANBP2L4, KIAA0336	http://www.genecards.org/cgi-bin/carddisp.pl?gene=GCC2
GDAP1	Ganglioside Induced Differentiation Associated Protein 1	CMT4, CMTRIA, CMT4A	http://www.genecards.org/cgi-bin/carddisp.pl?gene=GDAP1
GFER	Growth Factor, Augmenter Of Liver Regeneration	ALR, ERV1, HPO1, HPO2, HSS, HERV1, HPO, Hepatopoietin	http://www.genecards.org/cgi-bin/carddisp.pl?gene=GFER
GFPT1	Glutamine--Fructose-6-Phosphate Transaminase 1	CMS12, CMSTA1, GFA, GFAT1m, GFPT1L, MSLG, GFPT, GFAT, GFAT1	http://www.genecards.org/cgi-bin/carddisp.pl?gene=GFPT1
GFPT2	Glutamine-Fructose-6-Phosphate Transaminase 2	GFAT, GFAT2	http://www.genecards.org/cgi-bin/carddisp.pl?gene=GFPT2
GLG1	Golgi Glycoprotein 1	CFR1, MG160, ESL1, CFR-1, MG-160, ESL-1	http://www.genecards.org/cgi-bin/carddisp.pl?gene=GLG1
GLRX	Glutaredoxin	glutaredoxin, thioltransferase, GRX1, thioltransferase-1, GRX, TTase-1	http://www.genecards.org/cgi-bin/carddisp.pl?gene=GLRX
GMFG	Glia Maturation Factor Gamma	GMF-GAMMA	http://www.genecards.org/cgi-bin/carddisp.pl?gene=GMFG
GMPR2	Guanosine Monophosphate Reductase 2		http://www.genecards.org/cgi-bin/carddisp.pl?gene=GMPR2
GOLGA2	Golgin A2	golgin-95, GM130	http://www.genecards.org/cgi-bin/carddisp.pl?gene=GOLGA2
GOLGA3	Golgin A3	MEA-2, golgin-160, golgin-165, GCP170	http://www.genecards.org/cgi-bin/carddisp.pl?gene=GOLGA3
GOLGB1	Golgin B1	macrogolgin, GCP, GOLIM1, giantin, GCP372	http://www.genecards.org/cgi-bin/carddisp.pl?gene=GOLGB1
GOLIM4	Golgi Integral Membrane Protein 4	P138, GOLPH4, GIMPC, GPP130	http://www.genecards.org/cgi-bin/carddisp.pl?gene=GOLIM4
GOLM1	Golgi Membrane Protein 1	GP73, HEL46, PSEC0257, bA379P1.3, C9orf155, GOLPH2	http://www.genecards.org/cgi-bin/carddisp.pl?gene=GOLM1
GOLPH3	Golgi Phosphoprotein 3	coat-protein, GOPP1, Vps74, GPP34, MIDAS	http://www.genecards.org/cgi-bin/carddisp.pl?gene=GOLPH3
GOLPH3L	Golgi Phosphoprotein 3 Like	GPP34R	http://www.genecards.org/cgi-bin/carddisp.pl?gene=GOLPH3L
GORASP1	Golgi Reassembly Stacking Protein 1	P65, GOLPH5, GRASP65	http://www.genecards.org/cgi-bin/carddisp.pl?gene=GORASP1
GOSR1	Golgi SNAP Receptor Complex Member 1	p28, GOLIM2, GOS28, GOS28/P28, GOS-28, GS28	http://www.genecards.org/cgi-bin/carddisp.pl?gene=GOSR1
GOSR2	Golgi SNAP Receptor Complex Member 2	BOS1, EPM6, membrin, GS27	http://www.genecards.org/cgi-bin/carddisp.pl?gene=GOSR2
GPALPP1	GPALPP Motifs Containing 1	KIAA1704, AD029, bA245H20.2, LSR7	http://www.genecards.org/cgi-bin/carddisp.pl?gene=GPALPP1
GPRIN1	G Protein Regulated Inducer Of Neurite Outgrowth 1	GRIN1, KIAA1893	http://www.genecards.org/cgi-bin/carddisp.pl?gene=GPRIN1
GRIPAP1	GRIP1 Associated Protein 1	GRASP-1, KIAA1167	http://www.genecards.org/cgi-bin/carddisp.pl?gene=GRIPAP1
GSPT2	G1 To S Phase Transition 2	GST2, ERF3B	http://www.genecards.org/cgi-bin/carddisp.pl?gene=GSPT2
GSTK1	Glutathione S-Transferase Kappa 1	GST13-13, GSTK1-1, hGSTK1, GST, GST13	http://www.genecards.org/cgi-bin/carddisp.pl?gene=GSTK1
GTF2A1	General Transcription Factor IIA Subunit 1	TFIIA, TF2A1, TFIIA-42, TFIIAL	http://www.genecards.org/cgi-bin/carddisp.pl?gene=GTF2A1
GTF2H3	General Transcription Factor IIH Subunit 3	TFB4, p34, BTF2, TFIIH	http://www.genecards.org/cgi-bin/carddisp.pl?gene=GTF2H3
GULP1	GULP, Engulfment Adaptor PTB Domain Containing 1	CED-6, CED6, GULP	http://www.genecards.org/cgi-bin/carddisp.pl?gene=GULP1
GYPC	Glycophorin C (Gerbich Blood Group)	CD236R, GPD, GE, PAS-2, CD236, glycoconnectin, glycophorin-D, GPC, GLPC, GYPD	http://www.genecards.org/cgi-bin/carddisp.pl?gene=GYPC
GZMA	Granzyme A	Granzyme-1, HF, fragmentin-1, CTLA3, HFSP	http://www.genecards.org/cgi-bin/carddisp.pl?gene=GZMA
H1F0	H1 Histone Family Member 0	H1.0, H1(0), H1-0, H10, H1FV	http://www.genecards.org/cgi-bin/carddisp.pl?gene=H1F0
H1FX	H1 Histone Family Member X	H1.10, H1X	http://www.genecards.org/cgi-bin/carddisp.pl?gene=H1FX
HDGF	Hepatoma-Derived Growth Factor	HMG1L2, HMG-1L2	http://www.genecards.org/cgi-bin/carddisp.pl?gene=HDGF
HELZ2	Helicase With Zinc Finger 2	PDIP-1, PDIP1, PRIC285, KIAA1769	http://www.genecards.org/cgi-bin/carddisp.pl?gene=HELZ2
HGS	Hepatocyte Growth Factor-Regulated Tyrosine Kinase Substrate	HRS	http://www.genecards.org/cgi-bin/carddisp.pl?gene=HGS
HINT2	Histidine Triad Nucleotide Binding Protein 2	HINT-3, HIT-17kDa, HINT-2, HIT-17	http://www.genecards.org/cgi-bin/carddisp.pl?gene=HINT2
HIST1H1D	Histone Cluster 1, H1d	H1D, H1s-2, H1F3, H1.3	http://www.genecards.org/cgi-bin/carddisp.pl?gene=HIST1H1D
HIST1H2AC	Histone Cluster 1, H2ac	H2AFL, H2A/l, dJ221C16.4	http://www.genecards.org/cgi-bin/carddisp.pl?gene=HIST1H2AC
HIST1H2BI	Histone Cluster 1, H2bi	H2BFL, H2B/l, H2B/a, H2B/g, H2B/h, H2B/k, H2BFA, H2BFG, H2BFH, H2BFK	http://www.genecards.org/cgi-bin/carddisp.pl?gene=HIST1H2BI
HIST2H2AC	Histone Cluster 2, H2ac	H2AFQ, H2A-GL101, H2A, H2A/q	http://www.genecards.org/cgi-bin/carddisp.pl?gene=HIST2H2AC
HK2	Hexokinase 2	HKII, HXK2	http://www.genecards.org/cgi-bin/carddisp.pl?gene=HK2
HLA-A	Major Histocompatibility Complex, Class I, A	Aw-33, Aw-74, HLAA, Aw-19, Aw-24, Aw-34, Aw-36, Aw-43, Aw-66, Aw-68, Aw-69, Aw-80	http://www.genecards.org/cgi-bin/carddisp.pl?gene=HLA-A
HLA-B	Major Histocompatibility Complex, Class I, B	SPDA1, AS, Bw-47, Bw-50, HLAB, BDT, Bw-22, Bw-4, Bw-41, Bw-44, Bw-45, Bw-46, Bw-48, Bw-52, Bw-53, Bw-54, Bw-55, Bw-56, Bw-57, Bw-58, Bw-60	http://www.genecards.org/cgi-bin/carddisp.pl?gene=HLA-B
HLA-C	Major Histocompatibility Complex, Class I, C	HLAC, HLA-JY3, D6S204, PSORS1, HLC-C	http://www.genecards.org/cgi-bin/carddisp.pl?gene=HLA-C
HLA-DRA	Major Histocompatibility Complex, Class II, DR Alpha	MLRW, HLA-DRA1	http://www.genecards.org/cgi-bin/carddisp.pl?gene=HLA-DRA
HLA-DRB1	Major Histocompatibility Complex, Class II, DR Beta 1	DW2.2/DR2.2, DR-1, DR-12, DR-13, DR-14, DR-16, DR-4, DR-5, DR-7, DR-8, DR-9, DR1, DR12, DR13, DR14, DR16, DR4, DR5, DR7, DR8, DR9, DRB1, HLA-DRB, SS1, HLA-DR1B, DRw8, HLA-DRB2, DRw10, DRw11	http://www.genecards.org/cgi-bin/carddisp.pl?gene=HLA-DRB1
HLA-DRB5	Major Histocompatibility Complex, Class II, DR Beta 5	HLA-DRB, DR-9, DR9, dw2, DR2-beta-2	http://www.genecards.org/cgi-bin/carddisp.pl?gene=HLA-DRB5
HLA-E	Major Histocompatibility Complex, Class I, E	HLAE, HLA-6.2, QA1, MHC, EA1.2, EA2.1	http://www.genecards.org/cgi-bin/carddisp.pl?gene=HLA-E
HLA-F	Major Histocompatibility Complex, Class I, F	CDA12, HLA-CDA12, HLA-5.4, HLAF	http://www.genecards.org/cgi-bin/carddisp.pl?gene=HLA-F
HMGA1	High Mobility Group AT-Hook 1	HMG-R, HMGA1A, HMGIY, HMG-I(Y)	http://www.genecards.org/cgi-bin/carddisp.pl?gene=HMGA1
HMGA2	High Mobility Group AT-Hook 2	BABL, HMGI-C, LIPO, STQTL9, HMGIC	http://www.genecards.org/cgi-bin/carddisp.pl?gene=HMGA2
HMGCR	3-Hydroxy-3-Methylglutaryl-CoA Reductase	LDLCQ3	http://www.genecards.org/cgi-bin/carddisp.pl?gene=HMGCR
HMGN1	High Mobility Group Nucleosome Binding Domain 1	HMG14	http://www.genecards.org/cgi-bin/carddisp.pl?gene=HMGN1
HMGN2	High Mobility Group Nucleosomal Binding Domain 2	HMG17	http://www.genecards.org/cgi-bin/carddisp.pl?gene=HMGN2
HNRNPAB	Heterogeneous Nuclear Ribonucleoprotein A/B	HNRPAB, ABBP-1, ABBP1	http://www.genecards.org/cgi-bin/carddisp.pl?gene=HNRNPAB
HNRNPC	Heterogeneous Nuclear Ribonucleoprotein C (C1/C2)	C1, C2, HNRNP, SNRPC, HNRPC	http://www.genecards.org/cgi-bin/carddisp.pl?gene=HNRNPC
HOOK3	Hook Microtubule-Tethering Protein 3	HK3, h-hook3, hHK3	http://www.genecards.org/cgi-bin/carddisp.pl?gene=HOOK3
HPF1	Histone PARylation Factor 1	C4orf27	http://www.genecards.org/cgi-bin/carddisp.pl?gene=HPF1
HSPA5	Heat Shock Protein Family A (Hsp70) Member 5	BIP, 78kDa, MIF2, HEL-S-89n, GRP78, GRP-78	http://www.genecards.org/cgi-bin/carddisp.pl?gene=HSPA5
HSPA6	Heat Shock Protein Family A (Hsp70) Member 6	HSP70B	http://www.genecards.org/cgi-bin/carddisp.pl?gene=HSPA6
HSPA9	Heat Shock Protein Family A (Hsp70) Member 9	MOT2, MTHSP75, SAAN, SIDBA4, mortalin-2, p66-mortalin, mortalin2, HSPA9B, GRP-75, GRP75, MOT, PBP74, CSA, CRP40, EVPLS, HEL-S-124m, mt-HSP70, Mortalin	http://www.genecards.org/cgi-bin/carddisp.pl?gene=HSPA9
HSPG2	Heparan Sulfate Proteoglycan 2	PRCAN, SJA, SJS, SJS1, HSPG, PLC, Perlecan	http://www.genecards.org/cgi-bin/carddisp.pl?gene=HSPG2
ICAM1	Intercellular Adhesion Molecule 1	BB2, CD54, P3.58, ICAM-1	http://www.genecards.org/cgi-bin/carddisp.pl?gene=ICAM1
IDO1	Indoleamine 2,3-Dioxygenase 1	IDO, INDO, IDO-1	http://www.genecards.org/cgi-bin/carddisp.pl?gene=IDO1
IFI35	Interferon Induced Protein 35	ifi-35, IFP35	http://www.genecards.org/cgi-bin/carddisp.pl?gene=IFI35
IFIT1	Interferon Induced Protein With Tetratricopeptide Repeats 1	p56, C56, IFI-56, RNM561, G10P1, IFI56, IFNAI1, IFI-56K, IFIT-1, ISG56	http://www.genecards.org/cgi-bin/carddisp.pl?gene=IFIT1
IFIT3	Interferon Induced Protein With Tetratricopeptide Repeats 3	P60, GARG-49, IRG2, cig41, IFIT4, CIG-49, CIG49, IFI-60K, IFI60, IFIT-3, IFIT-4, ISG-60, ISG60, RIG-G	http://www.genecards.org/cgi-bin/carddisp.pl?gene=IFIT3
IFRD1	Interferon Related Developmental Regulator 1	PC4, TIS7	http://www.genecards.org/cgi-bin/carddisp.pl?gene=IFRD1
IFT27	Intraflagellar Transport 27	BBS19, RABL4, RAYL	http://www.genecards.org/cgi-bin/carddisp.pl?gene=IFT27
IGF2BP2	Insulin Like Growth Factor 2 MRNA Binding Protein 2	IMP-2, IMP2, VICKZ2	http://www.genecards.org/cgi-bin/carddisp.pl?gene=IGF2BP2
IGFBP2	Insulin Like Growth Factor Binding Protein 2	IGF-BP53, IBP2, IBP-2, IGFBP-2, BP2	http://www.genecards.org/cgi-bin/carddisp.pl?gene=IGFBP2
IL1B	Interleukin 1 Beta	IL-1, IL1-BETA, catabolin, pro-interleukin-1-beta, IL1F2	http://www.genecards.org/cgi-bin/carddisp.pl?gene=IL1B
IL1RAP	Interleukin 1 Receptor Accessory Protein	C3orf13, IL-1R3, IL-1RAcP, IL1R3, IL-1R-3	http://www.genecards.org/cgi-bin/carddisp.pl?gene=IL1RAP
IMMT	Inner Membrane Mitochondrial Protein	mitofilin, Mic60, P87, P87/89, P89, PIG4, PIG52, HMP, MINOS2	http://www.genecards.org/cgi-bin/carddisp.pl?gene=IMMT
INIP	INTS3 And NABP Interacting Protein	HSPC043, MISE, SOSSC, C9orf80, SOSS-C, SSBIP1, hSSBIP1	http://www.genecards.org/cgi-bin/carddisp.pl?gene=INIP
INPP5K	Inositol Polyphosphate-5-Phosphatase K	PPS, SKIP	http://www.genecards.org/cgi-bin/carddisp.pl?gene=INPP5K
IRF2BPL	Interferon Regulatory Factor 2 Binding Protein Like	EAP1, C14orf4, KIAA1865	http://www.genecards.org/cgi-bin/carddisp.pl?gene=IRF2BPL
IRF9	Interferon Regulatory Factor 9	P48, ISGF3G, IRF-9, ISGF3	http://www.genecards.org/cgi-bin/carddisp.pl?gene=IRF9
IRS2	Insulin Receptor Substrate 2	IRS-2	http://www.genecards.org/cgi-bin/carddisp.pl?gene=IRS2
ISCA2	Iron-Sulfur Cluster Assembly 2	ISA2, MMDS4, c14_5557, HBLD1	http://www.genecards.org/cgi-bin/carddisp.pl?gene=ISCA2
ISCU	Iron-Sulfur Cluster Assembly Enzyme	HML, 2310020H20Rik, ISU2, NIFU, hnifU, NIFUN	http://www.genecards.org/cgi-bin/carddisp.pl?gene=ISCU
ITGA3	Integrin Subunit Alpha 3	CD49C, GAP-B3, ILNEB, VCA-2, MSK18, FRP-2, GAPB3, VL3A, VLA3a	http://www.genecards.org/cgi-bin/carddisp.pl?gene=ITGA3
ITGB3	Integrin Subunit Beta 3	GT, BDPLT16, BDPLT2, GP3A, GPIIIa, CD61	http://www.genecards.org/cgi-bin/carddisp.pl?gene=ITGB3
ITPR1	Inositol 1,4,5-Trisphosphate Receptor Type 1	ACV, CLA4, IP3R, IP3R1, PPP1R94, SCA15, SCA16, SCA29, INSP3R1	http://www.genecards.org/cgi-bin/carddisp.pl?gene=ITPR1
JAM3	Junctional Adhesion Molecule 3	JAM-2, JAMC, JAM-3, JAM-C	http://www.genecards.org/cgi-bin/carddisp.pl?gene=JAM3
JUNB	Jun B Proto-Oncogene	AP-1	http://www.genecards.org/cgi-bin/carddisp.pl?gene=JUNB
JUND	Jun D Proto-Oncogene	AP-1	http://www.genecards.org/cgi-bin/carddisp.pl?gene=JUND
KHDRBS3	KH Domain Containing, RNA Binding, Signal Transduction Associated 3	Etle, T-STAR, TSTAR, etoile, SALP, SLM-2, SLM2	http://www.genecards.org/cgi-bin/carddisp.pl?gene=KHDRBS3
KIAA1755	KIAA1755	KIAA1755, RP5-1054A22.3	http://www.genecards.org/cgi-bin/carddisp.pl?gene=KIAA1755
KIF14	Kinesin Family Member 14	MKS12, KIAA0042	http://www.genecards.org/cgi-bin/carddisp.pl?gene=KIF14
KLC1	Kinesin Light Chain 1	KNS2, KNS2A, KLC	http://www.genecards.org/cgi-bin/carddisp.pl?gene=KLC1
KLC2	Kinesin Light Chain 2		http://www.genecards.org/cgi-bin/carddisp.pl?gene=KLC2
KYNU	Kynureninase	kynureninase, KYNUU	http://www.genecards.org/cgi-bin/carddisp.pl?gene=KYNU
LAP3	Leucine Aminopeptidase 3	LAP, LAP-3, HEL-S-106, PEPS, LAPEP	http://www.genecards.org/cgi-bin/carddisp.pl?gene=LAP3
LARP6	La Ribonucleoprotein Domain Family Member 6	ACHN, acheron	http://www.genecards.org/cgi-bin/carddisp.pl?gene=LARP6
LARP7	La Ribonucleoprotein Domain Family Member 7	ALAZS, HDCMA18P, PIP7S	http://www.genecards.org/cgi-bin/carddisp.pl?gene=LARP7
LASP1	LIM And SH3 Protein 1	Lasp-1, MLN50	http://www.genecards.org/cgi-bin/carddisp.pl?gene=LASP1
LIMA1	LIM Domain And Actin Binding 1	1110021C24Rik, EPLIN, SREBP3	http://www.genecards.org/cgi-bin/carddisp.pl?gene=LIMA1
LMAN1	Lectin, Mannose Binding 1	ERGIC-53, FMFD1, MCFD1, MR60, gp58, F5F8D, ERGIC53	http://www.genecards.org/cgi-bin/carddisp.pl?gene=LMAN1
LMNA	Lamin A/C	CDCD1, CDDC, CMT2B1, EMD2, FPL, FPLD, FPLD2, HGPS, IDC, LDP1, LFP, LMNC, LGMD1B, LMNL1, PRO1, LMN1, prelamin-A/C, CMD1A	http://www.genecards.org/cgi-bin/carddisp.pl?gene=LMNA
LMNB2	Lamin B2	LAMB2, LMN2, EPM9	http://www.genecards.org/cgi-bin/carddisp.pl?gene=LMNB2
LMO7	LIM Domain 7	FBXO20, FBX20, LMO-7, LOMP, KIAA0858	http://www.genecards.org/cgi-bin/carddisp.pl?gene=LMO7
LMTK2	Lemur Tyrosine Kinase 2	PPP1R100, cprk, AATYK2, BREK, KPI2, LMR2, hBREK, KIAA1079, KPI-2	http://www.genecards.org/cgi-bin/carddisp.pl?gene=LMTK2
LOXL3	Lysyl Oxidase Like 3	LOXL	http://www.genecards.org/cgi-bin/carddisp.pl?gene=LOXL3
LPP	LIM Domain Containing Preferred Translocation Partner In Lipoma		http://www.genecards.org/cgi-bin/carddisp.pl?gene=LPP
LRP1	LDL Receptor Related Protein 1	CD91, IGFBP3R, LRP, LRP1A, TGFBR5, A2MR, APR, APOER, LRP-1	http://www.genecards.org/cgi-bin/carddisp.pl?gene=LRP1
LRRC47	Leucine Rich Repeat Containing 47	KIAA1185	http://www.genecards.org/cgi-bin/carddisp.pl?gene=LRRC47
LRRC57	Leucine Rich Repeat Containing 57		http://www.genecards.org/cgi-bin/carddisp.pl?gene=LRRC57
LRRFIP2	Leucine Rich Repeat (In FLII) Interacting Protein 2	HUFI-2	http://www.genecards.org/cgi-bin/carddisp.pl?gene=LRRFIP2
LSM1	LSM1 Homolog, MRNA Degradation Associated	YJL124C, CASM	http://www.genecards.org/cgi-bin/carddisp.pl?gene=LSM1
LTBP3	Latent Transforming Growth Factor Beta Binding Protein 3	DASS, STHAG6, pp6425, LTBP2, LTBP-3	http://www.genecards.org/cgi-bin/carddisp.pl?gene=LTBP3
LUC7L2	LUC7-Like 2 Pre-MRNA Splicing Factor	CGI-59, CGI-74, LUC7B2	http://www.genecards.org/cgi-bin/carddisp.pl?gene=LUC7L2
LZTFL1	Leucine Zipper Transcription Factor Like 1	BBS17	http://www.genecards.org/cgi-bin/carddisp.pl?gene=LZTFL1
MAFF	V-Maf Avian Musculoaponeurotic Fibrosarcoma Oncogene Homolog F	U-MAF, hMafF	http://www.genecards.org/cgi-bin/carddisp.pl?gene=MAFF
MAGEC1	MAGE Family Member C1	CT7.1, CT7	http://www.genecards.org/cgi-bin/carddisp.pl?gene=MAGEC1
MAP1B	Microtubule Associated Protein 1B	FUTSCH, MAP5, PPP1R102, MAP-1B	http://www.genecards.org/cgi-bin/carddisp.pl?gene=MAP1B
MAP2K6	Mitogen-Activated Protein Kinase Kinase 6	MAPKK6, PRKMK6, MEK6, MKK6, SAPKK3, SKK3, SAPKK-3, mitogen-activated	http://www.genecards.org/cgi-bin/carddisp.pl?gene=MAP2K6
MAP4	Microtubule Associated Protein 4	MAP-4	http://www.genecards.org/cgi-bin/carddisp.pl?gene=MAP4
MARCKS	Myristoylated Alanine Rich Protein Kinase C Substrate	MACS, PKCSL, phosphomyristin, 80K-L, PRKCSL	http://www.genecards.org/cgi-bin/carddisp.pl?gene=MARCKS
MARK2	Microtubule Affinity Regulating Kinase 2	PAR-1, EMK-1, EMK1, Par1b, Par-1b	http://www.genecards.org/cgi-bin/carddisp.pl?gene=MARK2
MBNL1	Muscleblind Like Splicing Regulator 1	MBNL, EXP, KIAA0428	http://www.genecards.org/cgi-bin/carddisp.pl?gene=MBNL1
MCAM	Melanoma Cell Adhesion Molecule	Gicerin, CD146, MUC18	http://www.genecards.org/cgi-bin/carddisp.pl?gene=MCAM
MED25	Mediator Complex Subunit 25	P78, BVSYS, CMT2B2, TCBAP0758, ACID1, ARC92, PTOV2	http://www.genecards.org/cgi-bin/carddisp.pl?gene=MED25
MEF2A	Myocyte Enhancer Factor 2A	RSRFC4, RSRFC9, mef2, ADCAD1	http://www.genecards.org/cgi-bin/carddisp.pl?gene=MEF2A
MEPCE	Methylphosphate Capping Enzyme	BCDIN3, MePCE	http://www.genecards.org/cgi-bin/carddisp.pl?gene=MEPCE
METAP2	Methionyl Aminopeptidase 2	p67, MAP2, MNPEP, p67eIF2	http://www.genecards.org/cgi-bin/carddisp.pl?gene=METAP2
METTL1	Methyltransferase Like 1	TRM8, TRMT8, YDL201w, C12orf1, tRNA(m7G46)-methyltransferase	http://www.genecards.org/cgi-bin/carddisp.pl?gene=METTL1
MFAP1	Microfibrillar Associated Protein 1		http://www.genecards.org/cgi-bin/carddisp.pl?gene=MFAP1
MIB1	Mindbomb E3 Ubiquitin Protein Ligase 1	DIP1, LVNC7, MIB, ZZZ6, DIP-1, ZZANK2, KIAA1323	http://www.genecards.org/cgi-bin/carddisp.pl?gene=MIB1
MICALL2	MICAL Like 2	JRAB, MICAL-L2	http://www.genecards.org/cgi-bin/carddisp.pl?gene=MICALL2
MIEN1	Migration And Invasion Enhancer 1	C35, ORB3, C17orf37, RDX12, XTP4	http://www.genecards.org/cgi-bin/carddisp.pl?gene=MIEN1
MOCOS	Molybdenum Cofactor Sulfurase	HMCS, MCS, MOS	http://www.genecards.org/cgi-bin/carddisp.pl?gene=MOCOS
MORC2	MORC Family CW-Type Zinc Finger 2	CMT2Z, ZCW3, ZCWCC1, KIAA0852	http://www.genecards.org/cgi-bin/carddisp.pl?gene=MORC2
MORF4L2	Mortality Factor 4 Like 2	MORFL2, MRGX, KIAA0026	http://www.genecards.org/cgi-bin/carddisp.pl?gene=MORF4L2
MRPL12	Mitochondrial Ribosomal Protein L12	MRP-L31/34, MRPL7, MRPL7/L12, RPML12, 5c5-2, L12mt, MRP-L12	http://www.genecards.org/cgi-bin/carddisp.pl?gene=MRPL12
MRPL14	Mitochondrial Ribosomal Protein L14	MRPL32, RPML32, RMPL32, L14mt, L32mt, MRP-L14, MRP-L32	http://www.genecards.org/cgi-bin/carddisp.pl?gene=MRPL14
MRPL27	Mitochondrial Ribosomal Protein L27	L27mt, MRP-L27	http://www.genecards.org/cgi-bin/carddisp.pl?gene=MRPL27
MRPS10	Mitochondrial Ribosomal Protein S10	PNAS-122, MRP-S10, S10mt	http://www.genecards.org/cgi-bin/carddisp.pl?gene=MRPS10
MRPS18A	Mitochondrial Ribosomal Protein S18A	HumanS18b, MRPS18-3, S18bmt, MRP-S18-3, MRP-S18-a, S18mt-a, Mrps18a	http://www.genecards.org/cgi-bin/carddisp.pl?gene=MRPS18A
MTHFD2	Methylenetetrahydrofolate Dehydrogenase (NADP+ Dependent) 2, Methenyltetrahydrofolate Cyclohydrolase	NMDMC	http://www.genecards.org/cgi-bin/carddisp.pl?gene=MTHFD2
MTMR10	Myotubularin Related Protein 10		http://www.genecards.org/cgi-bin/carddisp.pl?gene=MTMR10
MVP	Major Vault Protein	LRP, VAULT1	http://www.genecards.org/cgi-bin/carddisp.pl?gene=MVP
MX1	MX Dynamin Like GTPase 1	IFI78, MX, MxA, IFI-78K	http://www.genecards.org/cgi-bin/carddisp.pl?gene=MX1
MXRA7	Matrix Remodelling Associated 7	PS1TP1, TMAP1	http://www.genecards.org/cgi-bin/carddisp.pl?gene=MXRA7
MYH9	Myosin, Heavy Chain 9, Non-Muscle	BDPLT6, EPSTS, FTNS, MHA, NMHC-II-A, NMMHCA, DFNA17, NMMHC-IIA, NMMHC-A	http://www.genecards.org/cgi-bin/carddisp.pl?gene=MYH9
MYL6	Myosin Light Chain 6	ESMLC, LC17-GI, LC17-NM, LC17A, LC17B, MLC1SM, MLC3NM, MLC3SM, LC17, MLC-3	http://www.genecards.org/cgi-bin/carddisp.pl?gene=MYL6
MYOF	Myoferlin	myoferlin, FER1L3, KIAA1207	http://www.genecards.org/cgi-bin/carddisp.pl?gene=MYOF
NAA30	N(Alpha)-Acetyltransferase 30, NatC Catalytic Subunit	Mak3p, NAT12P, C14orf35, NAT12, MAK3	http://www.genecards.org/cgi-bin/carddisp.pl?gene=NAA30
NABP2	Nucleic Acid Binding Protein 2	LP3587, OBFC2B, SOSS-B1, SSB1, hSSB1	http://www.genecards.org/cgi-bin/carddisp.pl?gene=NABP2
NAE1	NEDD8 Activating Enzyme E1 Subunit 1	A-116A10.1, HPP1, ula-1, APPBP1, APP-BP1	http://www.genecards.org/cgi-bin/carddisp.pl?gene=NAE1
NCOR2	Nuclear Receptor Corepressor 2	CTG26, TNRC14, TRAC1, SMRTE, SMRTE-tau, TRAC-1, N-CoR2, SMAP270, SMRT, TRAC	http://www.genecards.org/cgi-bin/carddisp.pl?gene=NCOR2
NDRG1	N-Myc Downstream Regulated 1	DRG-1, rtp, CMT4D, GC4, HMSNL, NDR1, NMSL, PROXY1, RIT42, TARG1, TDD5, CAP43, DRG1	http://www.genecards.org/cgi-bin/carddisp.pl?gene=NDRG1
NEDD4	Neural Precursor Cell Expressed, Developmentally Down-Regulated 4, E3 Ubiquitin Protein Ligase	RPF1, NEDD4-1, KIAA0093, NEDD-4	http://www.genecards.org/cgi-bin/carddisp.pl?gene=NEDD4
NES	Nestin	nestin, Nbla00170	http://www.genecards.org/cgi-bin/carddisp.pl?gene=NES
NFAT5	Nuclear Factor Of Activated T-Cells 5, Tonicity-Responsive	NFATL1, NFATZ, OREBP, NF-AT5, TONEBP, KIAA0827	http://www.genecards.org/cgi-bin/carddisp.pl?gene=NFAT5
NFKB2	Nuclear Factor Kappa B Subunit 2	CVID10, LYT-10, NF-kB2, p49/p100, H2TF1, LYT10, p100, p52	http://www.genecards.org/cgi-bin/carddisp.pl?gene=NFKB2
NFXL1	Nuclear Transcription Factor, X-Box Binding Like 1	CDZFP, HOZFP, URCC5, OZFP	http://www.genecards.org/cgi-bin/carddisp.pl?gene=NFXL1
NGFR	Nerve Growth Factor Receptor	CD271, p75(NTR), p75NTR, TNFRSF16, Gp80-LNGFR	http://www.genecards.org/cgi-bin/carddisp.pl?gene=NGFR
NKTR	Natural Killer Cell Triggering Receptor	p104	http://www.genecards.org/cgi-bin/carddisp.pl?gene=NKTR
NMI	N-Myc And STAT Interactor	NMI	http://www.genecards.org/cgi-bin/carddisp.pl?gene=NMI
NOC3L	NOC3 Like DNA Replication Regulator	C10orf117, AD24, FAD24	http://www.genecards.org/cgi-bin/carddisp.pl?gene=NOC3L
NOP2	NOP2 Nucleolar Protein	p120, NOP120, NOL1, NSUN1	http://www.genecards.org/cgi-bin/carddisp.pl?gene=NOP2
NRP1	Neuropilin 1	NRP, NP1, BDCA4, CD304, VEGF165R	http://www.genecards.org/cgi-bin/carddisp.pl?gene=NRP1
NSMCE2	NSE2/MMS21 Homolog, SMC5-SMC6 Complex SUMO Ligase	NSE2, ZMIZ7, C8orf36, MMS21, hMMS21	http://www.genecards.org/cgi-bin/carddisp.pl?gene=NSMCE2
NTMT1	N-Terminal Xaa-Pro-Lys N-Methyltransferase 1	METTL11A, NRMT, NTM1A, NRMT1, AD-003, HOMT1A, C9orf32	http://www.genecards.org/cgi-bin/carddisp.pl?gene=NTMT1
NUB1	Negative Regulator Of Ubiquitin-Like Proteins 1	BS4, NUB1L, NYREN18	http://www.genecards.org/cgi-bin/carddisp.pl?gene=NUB1
NUBP1	Nucleotide Binding Protein 1	NBP1, NBP, NBP35	http://www.genecards.org/cgi-bin/carddisp.pl?gene=NUBP1
NUCKS1	Nuclear Casein Kinase And Cyclin-Dependent Kinase Substrate 1	P1, JC7, NUCKS	http://www.genecards.org/cgi-bin/carddisp.pl?gene=NUCKS1
NUMB	NUMB, Endocytic Adaptor Protein	S171, c14_5527, C14orf41, h-Numb	http://www.genecards.org/cgi-bin/carddisp.pl?gene=NUMB
NUPL2	Nucleoporin Like 2	H_RG271G13.9, NLP_1, hCG1, NLP-1, CG1	http://www.genecards.org/cgi-bin/carddisp.pl?gene=NUPL2
OAS3	2'-5'-Oligoadenylate Synthetase 3	p100, p100OAS	http://www.genecards.org/cgi-bin/carddisp.pl?gene=OAS3
OFD1	Oral-Facial-Digital Syndrome 1	71-7A, JBTS10, SGBS2, RP23, CXorf5	http://www.genecards.org/cgi-bin/carddisp.pl?gene=OFD1
OGDHL	Oxoglutarate Dehydrogenase-Like	OGDC-E1-like, KIAA1290	http://www.genecards.org/cgi-bin/carddisp.pl?gene=OGDHL
OGFR	Opioid Growth Factor Receptor	OGFr	http://www.genecards.org/cgi-bin/carddisp.pl?gene=OGFR
OPTN	Optineurin	ALS12, TFIIIA-INTP, HIP7, HYPL, optineurin, NRP, GLC1E, FIP-2, FIP2, HIP-7	http://www.genecards.org/cgi-bin/carddisp.pl?gene=OPTN
ORMDL3	ORMDL Sphingolipid Biosynthesis Regulator 3		http://www.genecards.org/cgi-bin/carddisp.pl?gene=ORMDL3
OSBPL5	Oxysterol Binding Protein Like 5	OBPH1, ORP-5, ORP5, KIAA1534	http://www.genecards.org/cgi-bin/carddisp.pl?gene=OSBPL5
OTUD4	OTU Deubiquitinase 4	DUBA6, HSHIN1, HIN1, KIAA1046	http://www.genecards.org/cgi-bin/carddisp.pl?gene=OTUD4
OXSR1	Oxidative Stress Responsive 1	KIAA1101, Osr1	http://www.genecards.org/cgi-bin/carddisp.pl?gene=OXSR1
PALLD	Palladin, Cytoskeletal Associated Protein	myoneurin, MYN, CGI151, CGI-151, SIH002, KIAA0992, PNCA1	http://www.genecards.org/cgi-bin/carddisp.pl?gene=PALLD
PARP10	Poly(ADP-Ribose) Polymerase Family Member 10	ARTD10, PARP-10	http://www.genecards.org/cgi-bin/carddisp.pl?gene=PARP10
PARP14	Poly(ADP-Ribose) Polymerase Family Member 14	pART8, ARTD8, BAL2, PARP-14, KIAA1268	http://www.genecards.org/cgi-bin/carddisp.pl?gene=PARP14
PARP9	Poly(ADP-Ribose) Polymerase Family Member 9	BAL, MGC:7868, ARTD9, BAL1, PARP-9	http://www.genecards.org/cgi-bin/carddisp.pl?gene=PARP9
PARS2	Prolyl-TRNA Synthetase 2, Mitochondrial (Putative)	proRS, MT-PRORS	http://www.genecards.org/cgi-bin/carddisp.pl?gene=PARS2
PCDH1	Protocadherin 1	PCDH42, protocadherin-42, PC42	http://www.genecards.org/cgi-bin/carddisp.pl?gene=PCDH1
PCM1	Pericentriolar Material 1	PTC4, RET/PCM-1, PCM-1, hPCM-1	http://www.genecards.org/cgi-bin/carddisp.pl?gene=PCM1
PDCD6IP	Programmed Cell Death 6 Interacting Protein	AIP1, DRIP4, HP95, ALIX, KIAA1375	http://www.genecards.org/cgi-bin/carddisp.pl?gene=PDCD6IP
PDLIM2	PDZ And LIM Domain 2	SLIM, mystique	http://www.genecards.org/cgi-bin/carddisp.pl?gene=PDLIM2
PDLIM7	PDZ And LIM Domain 7	1110003B01Rik, LMP1, LMP3, LMP, ENIGMA	http://www.genecards.org/cgi-bin/carddisp.pl?gene=PDLIM7
PEAK1	Pseudopodium Enriched Atypical Kinase 1	SGK269, KIAA2002	http://www.genecards.org/cgi-bin/carddisp.pl?gene=PEAK1
PEX13	Peroxisomal Biogenesis Factor 13	ZWS, NALD, PBD11A, PBD11B, peroxin-13	http://www.genecards.org/cgi-bin/carddisp.pl?gene=PEX13
PEX19	Peroxisomal Biogenesis Factor 19	PXMP1, 33kD, D1S2223E, PBD12A, PMP1, PMPI, peroxin-19, PXF, HK33	http://www.genecards.org/cgi-bin/carddisp.pl?gene=PEX19
PGM3	Phosphoglucomutase 3	AGM1, IMD23, PAGM, Phosphoglucomutase-3	http://www.genecards.org/cgi-bin/carddisp.pl?gene=PGM3
PHAX	Phosphorylated Adaptor For RNA Export	RNUXA	http://www.genecards.org/cgi-bin/carddisp.pl?gene=PHAX
PHB	Prohibitin	prohibitin, HEL-215, HEL-S-54e, PHB1	http://www.genecards.org/cgi-bin/carddisp.pl?gene=PHB
PHGDH	Phosphoglycerate Dehydrogenase	PGDH, NLS1, 3PGDH, HEL-S-113, NLS, PDG, PGAD, PGD, PHGDHD, SERA, 3-PGDH, PGDH3	http://www.genecards.org/cgi-bin/carddisp.pl?gene=PHGDH
PHLDA1	Pleckstrin Homology Like Domain Family A Member 1	DT1P1B11, PHRIP, TDAG51	http://www.genecards.org/cgi-bin/carddisp.pl?gene=PHLDA1
PHLDB1	Pleckstrin Homology Like Domain Family B Member 1	LL5alpha, LL5A, KIAA0638	http://www.genecards.org/cgi-bin/carddisp.pl?gene=PHLDB1
PICALM	Phosphatidylinositol Binding Clathrin Assembly Protein	LAP, CALM, CLTH	http://www.genecards.org/cgi-bin/carddisp.pl?gene=PICALM
PIGBOS1	PIGB Opposite Strand 1	HP06981	http://www.genecards.org/cgi-bin/carddisp.pl?gene=PIGBOS1
PIK3C2B	Phosphatidylinositol-4-Phosphate 3-Kinase Catalytic Subunit Type 2 Beta	PI3K-C2beta, C2-PI3K, PI3K-C2-beta	http://www.genecards.org/cgi-bin/carddisp.pl?gene=PIK3C2B
PLAT	Plasminogen Activator, Tissue Type	T-PA, TPA, alteplase, reteplase	http://www.genecards.org/cgi-bin/carddisp.pl?gene=PLAT
PLAUR	Plasminogen Activator, Urokinase Receptor	CD87, URKR, U-PAR, UPAR, MO3	http://www.genecards.org/cgi-bin/carddisp.pl?gene=PLAUR
PLEC	Plectin	HD1, PCN, plectin, EBSMD, EBSND, EBSO, EBSOG, EBSPA, LGMD2Q, PLEC1b, EBS1, PLEC1, PLTN, Plectin-1	http://www.genecards.org/cgi-bin/carddisp.pl?gene=PLEC
PLEKHF1	Pleckstrin Homology And FYVE Domain Containing 1	PHAFIN1, phafin-1, APPD, LAPF, ZFYVE15	http://www.genecards.org/cgi-bin/carddisp.pl?gene=PLEKHF1
PLIN2	Perilipin 2	adipophilin, ADFP, ADRP	http://www.genecards.org/cgi-bin/carddisp.pl?gene=PLIN2
PLIN3	Perilipin 3	47-KD, M6PRBP1, PP17, TIP47	http://www.genecards.org/cgi-bin/carddisp.pl?gene=PLIN3
PML	Promyelocytic Leukemia	MYL, PP8675, RNF71, TRIM19	http://www.genecards.org/cgi-bin/carddisp.pl?gene=PML
PMM2	Phosphomannomutase 2	PMI, PMI1, CDG1a, CDGS, CDG1	http://www.genecards.org/cgi-bin/carddisp.pl?gene=PMM2
PNN	Pinin, Desmosome Associated Protein	DRSP, SDK3, memA, DRS	http://www.genecards.org/cgi-bin/carddisp.pl?gene=PNN
PNPLA8	Patatin Like Phospholipase Domain Containing 8	IPLA2-2, MMLA, iPLA2gamma, IPLA2G, PNPLA-gamma, IPLA22, iPLA2-gamma	http://www.genecards.org/cgi-bin/carddisp.pl?gene=PNPLA8
PODXL	Podocalyxin Like	PC, podocalyxin-like, Gp200, PCLP, PCLP-1, PCLP1	http://www.genecards.org/cgi-bin/carddisp.pl?gene=PODXL
POLR1D	Polymerase (RNA) I Subunit D	POLR1C, RPA9, RPAC2, RPO1-3, TCS2, AC19, RPA16, RPC16, hRPA19	http://www.genecards.org/cgi-bin/carddisp.pl?gene=POLR1D
POLR2K	Polymerase (RNA) II Subunit K	RPABC4, RPB12, hRPB7.0, hsRPB10a, ABC10-alpha, RPB10alpha, RPB7.0	http://www.genecards.org/cgi-bin/carddisp.pl?gene=POLR2K
POLR2M	Polymerase (RNA) II Subunit M	GRINL1A, GCOM1, Gdown, Gdown1	http://www.genecards.org/cgi-bin/carddisp.pl?gene=POLR2M
POP7	POP7 Homolog, Ribonuclease P/MRP Subunit	RPP2, RPP20, 0610037N12Rik, hPOP7	http://www.genecards.org/cgi-bin/carddisp.pl?gene=POP7
PPIF	Peptidylprolyl Isomerase F	CYP-M, CYPD, Cyp-D, CYP3	http://www.genecards.org/cgi-bin/carddisp.pl?gene=PPIF
PPIG	Peptidylprolyl Isomerase G	CYP, SCAF10, SRCyp, CARS-Cyp, CARS-cyclophilin, CASP10, SR-cyclophilin, SR-cyp	http://www.genecards.org/cgi-bin/carddisp.pl?gene=PPIG
PPIL4	Peptidylprolyl Isomerase Like 4	PPIASE, HDCME13P	http://www.genecards.org/cgi-bin/carddisp.pl?gene=PPIL4
PPP1R12A	Protein Phosphatase 1 Regulatory Subunit 12A	M130, MBS, MYPT1	http://www.genecards.org/cgi-bin/carddisp.pl?gene=PPP1R12A
PPP1R18	Protein Phosphatase 1 Regulatory Subunit 18	KIAA1949, HKMT1098	http://www.genecards.org/cgi-bin/carddisp.pl?gene=PPP1R18
PPP1R9B	Protein Phosphatase 1 Regulatory Subunit 9B	SPN, PPP1R6, spinophilin, Neurabin-2, SPINO, neurabin-II, PPP1R9	http://www.genecards.org/cgi-bin/carddisp.pl?gene=PPP1R9B
PPP4R3A	Protein Phosphatase 4 Regulatory Subunit 3A	KIAA2010, FLFL1, MSTP033, PP4R3, smk-1, smk1, SMEK1, PP4R3A	http://www.genecards.org/cgi-bin/carddisp.pl?gene=PPP4R3A
PPTC7	PTC7 Protein Phosphatase Homolog	TA-PP2C, TAPP2C	http://www.genecards.org/cgi-bin/carddisp.pl?gene=PPTC7
PRCC	Papillary Renal Cell Carcinoma (Translocation-Associated)	RCCP1, TPRC	http://www.genecards.org/cgi-bin/carddisp.pl?gene=PRCC
PRKAB2	Protein Kinase AMP-Activated Non-Catalytic Subunit Beta 2		http://www.genecards.org/cgi-bin/carddisp.pl?gene=PRKAB2
PRKD2	Protein Kinase D2	HSPC187, PKD2, nPKC-D2	http://www.genecards.org/cgi-bin/carddisp.pl?gene=PRKD2
PRKG1	Protein Kinase, CGMP-Dependent, Type I	AAT8, PKG, cGK, cGKI-BETA, cGKI-alpha, PRKG1B, PRKGR1B, cGK1, cGKI, PRKGR1A	http://www.genecards.org/cgi-bin/carddisp.pl?gene=PRKG1
PRNP	Prion Protein	PRP, PRIP, p27-30, CD230, KURU, PrPc, CJD, GSS, AltPrP, PrP27-30, PrP33-35C, ASCR	http://www.genecards.org/cgi-bin/carddisp.pl?gene=PRNP
PRR9	Proline Rich 9		http://www.genecards.org/cgi-bin/carddisp.pl?gene=PRR9
PSAP	Prosaposin	SAP1, prosaposin, GLBA	http://www.genecards.org/cgi-bin/carddisp.pl?gene=PSAP
PSMA1	Proteasome Subunit Alpha 1	HC2, HEL-S-275, NU, PROS-30, PROS30, PSC2	http://www.genecards.org/cgi-bin/carddisp.pl?gene=PSMA1
PSMA5	Proteasome Subunit Alpha 5	zeta, PSC5	http://www.genecards.org/cgi-bin/carddisp.pl?gene=PSMA5
PSMB10	Proteasome Subunit Beta 10	beta2i, MECL1, LMP10	http://www.genecards.org/cgi-bin/carddisp.pl?gene=PSMB10
PSMB8	Proteasome Subunit Beta 8	RING10, Y2, ALDD, D6S216, D6S216E, JMP, NKJO, LMP7, PSMB5i	http://www.genecards.org/cgi-bin/carddisp.pl?gene=PSMB8
PSMC2	Proteasome 26S Subunit, ATPase 2	2, ATPase, MSS1, S7, Nbla10058	http://www.genecards.org/cgi-bin/carddisp.pl?gene=PSMC2
PSMD4	Proteasome 26S Subunit, Non-ATPase 4	ASF, AF-1, S5A, angiocidin, pUB-R5, AF, MCB1, Rpn10	http://www.genecards.org/cgi-bin/carddisp.pl?gene=PSMD4
PSME1	Proteasome Activator Subunit 1	HEL-S-129m, PA28A, REGalpha, IFI5111, PA28alpha, REG-alpha	http://www.genecards.org/cgi-bin/carddisp.pl?gene=PSME1
PSME2	Proteasome Activator Subunit 2	PA28B, REGbeta, PA28beta, REG-beta	http://www.genecards.org/cgi-bin/carddisp.pl?gene=PSME2
PSPH	Phosphoserine Phosphatase	PSP, PSPHD, PSPase	http://www.genecards.org/cgi-bin/carddisp.pl?gene=PSPH
PTBP1	Polypyrimidine Tract Binding Protein 1	HNRNP-I, HNRNPI, PTB-1, PTB-T, PTB2, PTB3, PTB4, PTB, HNRPI, pPTB	http://www.genecards.org/cgi-bin/carddisp.pl?gene=PTBP1
PTER	Phosphotriesterase Related	HPHRP, RPR-1	http://www.genecards.org/cgi-bin/carddisp.pl?gene=PTER
PTGS2	Prostaglandin-Endoperoxide Synthase 2	COX2, PGG/HS, GRIPGHS, PHS-2, hCox-2, COX-2, PGHS-2, Cyclooxygenase-2	http://www.genecards.org/cgi-bin/carddisp.pl?gene=PTGS2
PTMA	Prothymosin, Alpha	TMSA	http://www.genecards.org/cgi-bin/carddisp.pl?gene=PTMA
PTMS	Parathymosin	parathymosin, ParaT	http://www.genecards.org/cgi-bin/carddisp.pl?gene=PTMS
PTPN12	Protein Tyrosine Phosphatase, Non-Receptor Type 12	PTP-PEST, PTPG1	http://www.genecards.org/cgi-bin/carddisp.pl?gene=PTPN12
PTPRS	Protein Tyrosine Phosphatase, Receptor Type S	PTPSIGMA, R-PTP-S, R-PTP-sigma	http://www.genecards.org/cgi-bin/carddisp.pl?gene=PTPRS
PTRF	Polymerase I And Transcript Release Factor	CAVIN, CAVIN1, CGL4, cavin-1, FKSG13	http://www.genecards.org/cgi-bin/carddisp.pl?gene=PTRF
PVR	Poliovirus Receptor	CD155, HVED, NECL5, Necl-5, TAGE4, PVS	http://www.genecards.org/cgi-bin/carddisp.pl?gene=PVR
PYCR1	Pyrroline-5-Carboxylate Reductase 1	ARCL2B, ARCL3B, P5C, P5CR, PIG45, PP222, PRO3, PYCR	http://www.genecards.org/cgi-bin/carddisp.pl?gene=PYCR1
RAB13	RAB13, Member RAS Oncogene Family	GIG4	http://www.genecards.org/cgi-bin/carddisp.pl?gene=RAB13
RAB23	RAB23, Member RAS Oncogene Family	HSPC137	http://www.genecards.org/cgi-bin/carddisp.pl?gene=RAB23
RABEP2	Rabaptin, RAB GTPase Binding Effector Protein 2	FRA, Rabaptin-5beta, RABPT5B	http://www.genecards.org/cgi-bin/carddisp.pl?gene=RABEP2
RAC2	Ras-Related C3 Botulinum Toxin Substrate 2 (Rho Family, Small GTP Binding Protein Rac2)	EN-7, Gx, HSPC022, p21-Rac2	http://www.genecards.org/cgi-bin/carddisp.pl?gene=RAC2
RANBP3	RAN Binding Protein 3	RanBP3	http://www.genecards.org/cgi-bin/carddisp.pl?gene=RANBP3
RAPH1	Ras Association (RalGDS/AF-6) And Pleckstrin Homology Domains 1	LPD, RalGDS/AF-6, lamellipodin, ALS2CR18, ALS2CR9, PREL-2, PREL2, RMO1, KIAA1681	http://www.genecards.org/cgi-bin/carddisp.pl?gene=RAPH1
RBBP6	Retinoblastoma Binding Protein 6	PACT, MY038, P2P-R, SNAMA, RBQ-1, P2PR, RBQ1	http://www.genecards.org/cgi-bin/carddisp.pl?gene=RBBP6
RBCK1	RANBP2-Type And C3HC4-Type Zinc Finger Containing 1	XAP3, XAP4, HOIL1, PBMEI, PGBM1, RBCK2, ZRANB4, C20orf18, HOIL-1, RNF54, UBCE7IP3	http://www.genecards.org/cgi-bin/carddisp.pl?gene=RBCK1
RBM22	RNA Binding Motif Protein 22	Cwc2, fSAP47, ZC3H16	http://www.genecards.org/cgi-bin/carddisp.pl?gene=RBM22
RBM47	RNA Binding Motif Protein 47	NET18	http://www.genecards.org/cgi-bin/carddisp.pl?gene=RBM47
RBM8A	RNA Binding Motif Protein 8A	BOV-1A, BOV-1B, BOV-1C, C1DELq21.1, DEL1q21.1, MDS014, RBM8B, TAR, Y14, ZNRP, ZRNP1, RBM8, BOV-1	http://www.genecards.org/cgi-bin/carddisp.pl?gene=RBM8A
RBMS2	RNA Binding Motif Single Stranded Interacting Protein 2	SCR3	http://www.genecards.org/cgi-bin/carddisp.pl?gene=RBMS2
RBMX	RNA Binding Motif Protein, X-Linked	HNRNPG, MRXS11, RBMXRT, RNMX, hnRNP-G, HNRPG, RBMXP1	http://www.genecards.org/cgi-bin/carddisp.pl?gene=RBMX
RCN1	Reticulocalbin 1	HEL-S-84, PIG20, RCAL, RCN	http://www.genecards.org/cgi-bin/carddisp.pl?gene=RCN1
RELB	RELB Proto-Oncogene, NF-KB Subunit	I-REL, IREL, REL-B	http://www.genecards.org/cgi-bin/carddisp.pl?gene=RELB
REXO4	REX4 Homolog, 3'-5' Exonuclease	REX4, XPMC2, XPMC2H, PMC2, hPMC2	http://www.genecards.org/cgi-bin/carddisp.pl?gene=REXO4
RGPD3	RANBP2-Like And GRIP Domain Containing 3	RGP3	http://www.genecards.org/cgi-bin/carddisp.pl?gene=RGPD3
RHBDD1	Rhomboid Domain Containing 1	RRP4, RHBDL4	http://www.genecards.org/cgi-bin/carddisp.pl?gene=RHBDD1
RHOB	Ras Homolog Family Member B	H6, MST081, MSTP081, RHOH6, ARH6, ARHB	http://www.genecards.org/cgi-bin/carddisp.pl?gene=RHOB
RIPK2	Receptor Interacting Serine/Threonine Kinase 2	RIP2, CARD3, CCK, GIG30, CARDIAK, RICK, RIP-2	http://www.genecards.org/cgi-bin/carddisp.pl?gene=RIPK2
RND3	Rho Family GTPase 3	Rho8, RhoE, memB, ARHE, Rnd3	http://www.genecards.org/cgi-bin/carddisp.pl?gene=RND3
RNF113A	Ring Finger Protein 113A	ZNF183, Cwc24, TTD5, RNF113	http://www.genecards.org/cgi-bin/carddisp.pl?gene=RNF113A
RNF181	Ring Finger Protein 181	HSPC238	http://www.genecards.org/cgi-bin/carddisp.pl?gene=RNF181
RNF213	Ring Finger Protein 213	KIAA1618, NET57, mysterin, MYMY2, C17orf27, ALO17, MYSTR, KIAA1554	http://www.genecards.org/cgi-bin/carddisp.pl?gene=RNF213
RPL19	Ribosomal Protein L19	L19, cytosolic	http://www.genecards.org/cgi-bin/carddisp.pl?gene=RPL19
RPL26	Ribosomal Protein L26	DBA11, L26	http://www.genecards.org/cgi-bin/carddisp.pl?gene=RPL26
RPL29	Ribosomal Protein L29	HIP, HUMRPL29, L29, RPL29_3_370, RPL29P10	http://www.genecards.org/cgi-bin/carddisp.pl?gene=RPL29
RPLP2	Ribosomal Protein Lateral Stalk Subunit P2	p2, RPP2, LP2, D11S2243E	http://www.genecards.org/cgi-bin/carddisp.pl?gene=RPLP2
RPP25	Ribonuclease P/MRP Subunit P25		http://www.genecards.org/cgi-bin/carddisp.pl?gene=RPP25
RPS12	Ribosomal Protein S12	S12	http://www.genecards.org/cgi-bin/carddisp.pl?gene=RPS12
RPS19	Ribosomal Protein S19	S19, DBA1, DBA	http://www.genecards.org/cgi-bin/carddisp.pl?gene=RPS19
RPS21	Ribosomal Protein S21	HLDF, S21	http://www.genecards.org/cgi-bin/carddisp.pl?gene=RPS21
RPS6KA3	Ribosomal Protein S6 Kinase A3	CLS, RSK, HU-3, S6K-alpha3, p90-RSK2, MRX19, ISPK-1, MAPKAPK-1b, MAPKAPK1B, RSK-2, RSK2, S6K-alpha-3, pp90RSK2, ISPK1, p90RSK3	http://www.genecards.org/cgi-bin/carddisp.pl?gene=RPS6KA3
RPS6KB1	Ribosomal Protein S6 Kinase B1	PS6K, S6K, p70(S6K)-alpha, p70-S6K, p70-alpha, STK14A, S6K-beta-1, S6K1, P70S6K1	http://www.genecards.org/cgi-bin/carddisp.pl?gene=RPS6KB1
RRBP1	Ribosome Binding Protein 1	hES, ES130, RRP, ES/130, KIAA1398	http://www.genecards.org/cgi-bin/carddisp.pl?gene=RRBP1
RRP1	Ribosomal RNA Processing 1	D21S2056E, NNP-1, NOP52, RRP1A, NNP1	http://www.genecards.org/cgi-bin/carddisp.pl?gene=RRP1
RRP12	Ribosomal RNA Processing 12 Homolog	KIAA0690	http://www.genecards.org/cgi-bin/carddisp.pl?gene=RRP12
RRS1	Ribosome Biogenesis Regulator Homolog	KIAA0112, RRR	http://www.genecards.org/cgi-bin/carddisp.pl?gene=RRS1
RSL24D1	Ribosomal L24 Domain Containing 1	L30, HRP-L30-iso, RLP24, RPL24, TVAS3, C15orf15, RPL24L	http://www.genecards.org/cgi-bin/carddisp.pl?gene=RSL24D1
RTN4	Reticulon 4	NSP, ASY, NI220/250, NOGO-A, NOGOC, NSP-CL, Nbla00271, Nbla10545, Nogo-B, Nogo-C, RTN-X, RTN4-A, RTN4-B1, RTN4-B2, RTN4-C, foocen, NOGO, KIAA0886, Reticulon-5	http://www.genecards.org/cgi-bin/carddisp.pl?gene=RTN4
S100A11	S100 Calcium Binding Protein A11	HEL-S-43, calgizzarin, MLN70, S100C	http://www.genecards.org/cgi-bin/carddisp.pl?gene=S100A11
S100A6	S100 Calcium Binding Protein A6	2A9, 5B10, CABP, calcyclin, CACY, PRA	http://www.genecards.org/cgi-bin/carddisp.pl?gene=S100A6
S100P	S100 Calcium Binding Protein P	S100E, MIG9	http://www.genecards.org/cgi-bin/carddisp.pl?gene=S100P
SAMD9	Sterile Alpha Motif Domain Containing 9	NFTC, OEF2, C7orf5, DRIF1, OEF1, KIAA2004	http://www.genecards.org/cgi-bin/carddisp.pl?gene=SAMD9
SAMD9L	Sterile Alpha Motif Domain Containing 9 Like	UEF1, C7orf6, DRIF2, KIAA2005, UEF	http://www.genecards.org/cgi-bin/carddisp.pl?gene=SAMD9L
SART3	Squamous Cell Carcinoma Antigen Recognized By T-Cells 3	p100, p110, DSAP1, p110(nrb), SART-3, TIP110, KIAA0156, hSART-3, RP11-13G14	http://www.genecards.org/cgi-bin/carddisp.pl?gene=SART3
SCFD1	Sec1 Family Domain Containing 1	RA410, SLY1, SLY1P, C14orf163, STXBP1L2, KIAA0917	http://www.genecards.org/cgi-bin/carddisp.pl?gene=SCFD1
SCYL2	SCY1 Like Pseudokinase 2	CVAK104, KIAA1360	http://www.genecards.org/cgi-bin/carddisp.pl?gene=SCYL2
SDC4	Syndecan 4	amphiglycan, SYND4	http://www.genecards.org/cgi-bin/carddisp.pl?gene=SDC4
SEC16A	SEC16 Homolog A, Endoplasmic Reticulum Export Factor	p250, KIAA0310, SEC16L, SEC16	http://www.genecards.org/cgi-bin/carddisp.pl?gene=SEC16A
SEC24D	SEC24 Homolog D, COPII Coat Complex Component	CLCRP2, KIAA0755	http://www.genecards.org/cgi-bin/carddisp.pl?gene=SEC24D
SEC61B	Sec61 Translocon Beta Subunit		http://www.genecards.org/cgi-bin/carddisp.pl?gene=SEC61B
SEC61G	Sec61 Translocon Gamma Subunit	SSS1	http://www.genecards.org/cgi-bin/carddisp.pl?gene=SEC61G
SEMA4C	Semaphorin 4C	M-SEMA-F, SEMACL1, SEMAF, SEMAI, KIAA1739	http://www.genecards.org/cgi-bin/carddisp.pl?gene=SEMA4C
SEMA5A	Semaphorin 5A	SEMAF, semF, semaphorin-F	http://www.genecards.org/cgi-bin/carddisp.pl?gene=SEMA5A
SENP1	SUMO1/Sentrin Specific Peptidase 1	SuPr-2	http://www.genecards.org/cgi-bin/carddisp.pl?gene=SENP1
SERINC1	Serine Incorporator 1	TMS-2, TMS2, TDE2, TDE1L, KIAA1253	http://www.genecards.org/cgi-bin/carddisp.pl?gene=SERINC1
SERPINB2	Serpin Family B Member 2	HsT1201, PAI, PAI2, PLANH2, PAI-2	http://www.genecards.org/cgi-bin/carddisp.pl?gene=SERPINB2
SERPINB8	Serpin Family B Member 8	PI8, CAP2, PI-8, CAP-2	http://www.genecards.org/cgi-bin/carddisp.pl?gene=SERPINB8
SESN2	Sestrin 2	SEST2, HI95, Ses2	http://www.genecards.org/cgi-bin/carddisp.pl?gene=SESN2
SETX	Senataxin	senataxin, AOA2, bA479K20.2, ALS4, SCAR1, KIAA0625	http://www.genecards.org/cgi-bin/carddisp.pl?gene=SETX
SGTB	Small Glutamine Rich Tetratricopeptide Repeat Containing Beta	SGT2, beta-SGT	http://www.genecards.org/cgi-bin/carddisp.pl?gene=SGTB
SH3BGRL3	SH3 Domain Binding Glutamate Rich Protein Like 3	HEL-S-297, TIP-B1, SH3BP-1	http://www.genecards.org/cgi-bin/carddisp.pl?gene=SH3BGRL3
SH3GLB1	SH3 Domain Containing GRB2 Like Endophilin B1	CGI-61, PPP1R70, dJ612B15.2, Bif-1, KIAA0491	http://www.genecards.org/cgi-bin/carddisp.pl?gene=SH3GLB1
SH3KBP1	SH3 Domain Containing Kinase Binding Protein 1	GIG10, HSB1, MIG18, CD2BP3, CIN85, HSB-1	http://www.genecards.org/cgi-bin/carddisp.pl?gene=SH3KBP1
SHC1	SHC (Src Homology 2 Domain Containing) Transforming Protein 1	SHC, SHCA	http://www.genecards.org/cgi-bin/carddisp.pl?gene=SHC1
SIL1	SIL1 Nucleotide Exchange Factor	ULG5, BAP, MSS	http://www.genecards.org/cgi-bin/carddisp.pl?gene=SIL1
SLC12A7	Solute Carrier Family 12 Member 7	KCC4	http://www.genecards.org/cgi-bin/carddisp.pl?gene=SLC12A7
SLC16A6	Solute Carrier Family 16 Member 6	MCT7, MCT6	http://www.genecards.org/cgi-bin/carddisp.pl?gene=SLC16A6
SLC1A4	Solute Carrier Family 1 Member 4	SPATCCM, ASCT-1, ASCT1, SATT	http://www.genecards.org/cgi-bin/carddisp.pl?gene=SLC1A4
SLC1A5	Solute Carrier Family 1 Member 5	AAAT, ATBO, M7VS1, R16, M7V1, RDRC, ASCT2, ATB(0), RDR	http://www.genecards.org/cgi-bin/carddisp.pl?gene=SLC1A5
SLC20A2	Solute Carrier Family 20 Member 2	RAM1, IBGC1, IBGC3, PIT-2, Ram-1, MLVAR, GLVR-2, PIT2, hPit2, GLVR2	http://www.genecards.org/cgi-bin/carddisp.pl?gene=SLC20A2
SLC27A4	Solute Carrier Family 27 Member 4	IPS, ACSVL4, FATP4, FATP-4	http://www.genecards.org/cgi-bin/carddisp.pl?gene=SLC27A4
SLC2A3	Solute Carrier Family 2 Member 3	GLUT3, GLUT-3	http://www.genecards.org/cgi-bin/carddisp.pl?gene=SLC2A3
SLC39A11	Solute Carrier Family 39 Member 11	ZIP-11, C17orf26, ZIP11	http://www.genecards.org/cgi-bin/carddisp.pl?gene=SLC39A11
SLC39A14	Solute Carrier Family 39 Member 14	NET34, cig19, LZT-Hs4, ZIP-14, ZIP14, KIAA0062	http://www.genecards.org/cgi-bin/carddisp.pl?gene=SLC39A14
SLFN5	Schlafen Family Member 5		http://www.genecards.org/cgi-bin/carddisp.pl?gene=SLFN5
SLITRK4	SLIT And NTRK Like Family Member 4		http://www.genecards.org/cgi-bin/carddisp.pl?gene=SLITRK4
SLK	STE20 Like Kinase	STK2, LOSK, bA16H23.1, se20-9, hSLK, KIAA0204	http://www.genecards.org/cgi-bin/carddisp.pl?gene=SLK
SLTM	SAFB Like Transcription Modulator	MET	http://www.genecards.org/cgi-bin/carddisp.pl?gene=SLTM
SMC5	Structural Maintenance Of Chromosomes 5	SMC5L1, KIAA0594, hSMC5, SMC-5	http://www.genecards.org/cgi-bin/carddisp.pl?gene=SMC5
SMG1	SMG1 Phosphatidylinositol 3-Kinase-Related Kinase	LIP, ATX, 61E3.4, KIAA0421, SMG-1, hSMG-1	http://www.genecards.org/cgi-bin/carddisp.pl?gene=SMG1
SMG7	SMG7 Nonsense Mediated MRNA Decay Factor	SGA56M, C1orf16, EST1C, KIAA0250, hSMG-7	http://www.genecards.org/cgi-bin/carddisp.pl?gene=SMG7
SMTN	Smoothelin	smoothelin, SMSMO	http://www.genecards.org/cgi-bin/carddisp.pl?gene=SMTN
SNRNP27	Small Nuclear Ribonucleoprotein U4/U6.U5 Subunit 27	U4/U6.U5-27K, 27K, RY1	http://www.genecards.org/cgi-bin/carddisp.pl?gene=SNRNP27
SNTB1	Syntrophin Beta 1	A1B, SNT2, 59-DAP, syntrophin-2, SNT2B1, BSYN2, DAPA1B, TIP-43	http://www.genecards.org/cgi-bin/carddisp.pl?gene=SNTB1
SNU13	SNU13 Homolog, Small Nuclear Ribonucleoprotein (U4/U6.U5)	15.5K, FA1, FA-1, NHPX, SNRNP15-5, SPAG12, SSFA1, NHP2L1, OTK27, hSNU13	http://www.genecards.org/cgi-bin/carddisp.pl?gene=SNU13
SNX21	Sorting Nexin Family Member 21	PP3993, dJ337O18.4, C20orf161, SNX-L, SNXL	http://www.genecards.org/cgi-bin/carddisp.pl?gene=SNX21
SOD2	Superoxide Dismutase 2, Mitochondrial	IPOB, IPO-B, MNSOD, MVCD6, Mn-SOD	http://www.genecards.org/cgi-bin/carddisp.pl?gene=SOD2
SORBS2	Sorbin And SH3 Domain Containing 2	PRO0618, ARGBP2, KIAA0777, Sorbin	http://www.genecards.org/cgi-bin/carddisp.pl?gene=SORBS2
SOX5	SRY-Box 5	L-SOX5, L-SOX5B, L-SOX5F, LAMSHF	http://www.genecards.org/cgi-bin/carddisp.pl?gene=SOX5
SP100	SP100 Nuclear Antigen	lysp100b	http://www.genecards.org/cgi-bin/carddisp.pl?gene=SP100
SP110	SP110 Nuclear Body Protein	IPR1, VODI, IFI41, IFI75	http://www.genecards.org/cgi-bin/carddisp.pl?gene=SP110
SPAG1	Sperm Associated Antigen 1	CILD28, CT140, HEL-S-268, SP75, TPIS, HSD-3.8	http://www.genecards.org/cgi-bin/carddisp.pl?gene=SPAG1
SPATS2L	Spermatogenesis Associated Serine Rich 2 Like	DNAPTP6, SGNP	http://www.genecards.org/cgi-bin/carddisp.pl?gene=SPATS2L
SPECC1L	Sperm Antigen With Calponin Homology And Coiled-Coil Domains 1-Like	GBBB2, SPECC1-like, OBLFC1, CYTSA, KIAA0376	http://www.genecards.org/cgi-bin/carddisp.pl?gene=SPECC1L
SPRR2D	Small Proline Rich Protein 2D	SPR-2D, SPR-II	http://www.genecards.org/cgi-bin/carddisp.pl?gene=SPRR2D
SQRDL	Sulfide Quinone Reductase-Like (Yeast)	CGI-44, PRO1975, SQOR	http://www.genecards.org/cgi-bin/carddisp.pl?gene=SQRDL
SQSTM1	Sequestosome 1	P60, P62, ORCA, ZIP3, A170, FTDALS3, p62B, PDB3, OSIL, EBIAP	http://www.genecards.org/cgi-bin/carddisp.pl?gene=SQSTM1
SRGAP2	SLIT-ROBO Rho GTPase Activating Protein 2	SRGAP3, FNBP2, ARHGAP34, SRGAP2A, KIAA0456, srGAP2	http://www.genecards.org/cgi-bin/carddisp.pl?gene=SRGAP2
SRP54	Signal Recognition Particle 54kDa		http://www.genecards.org/cgi-bin/carddisp.pl?gene=SRP54
SRSF1	Serine/Arginine-Rich Splicing Factor 1	ASF, SFRS1, SF2, ASF-1, SF2p33, SRp30a	http://www.genecards.org/cgi-bin/carddisp.pl?gene=SRSF1
SRSF4	Serine/Arginine-Rich Splicing Factor 4	SRP75, SFRS4, SRP001LB	http://www.genecards.org/cgi-bin/carddisp.pl?gene=SRSF4
SRXN1	Sulfiredoxin 1	Npn3, SRX1, C20orf139, SRX	http://www.genecards.org/cgi-bin/carddisp.pl?gene=SRXN1
SSSCA1	Sjogren Syndrome/Scleroderma Autoantigen 1	p27	http://www.genecards.org/cgi-bin/carddisp.pl?gene=SSSCA1
STAM2	Signal Transducing Adaptor Molecule 2	HBP, STAM2A, STAM2B, STAM-2	http://www.genecards.org/cgi-bin/carddisp.pl?gene=STAM2
STAT1	Signal Transducer And Activator Of Transcription 1	CANDF7, IMD31A, IMD31B, IMD31C, ISGF-3, STAT91	http://www.genecards.org/cgi-bin/carddisp.pl?gene=STAT1
STIM2	Stromal Interaction Molecule 2	KIAA1482	http://www.genecards.org/cgi-bin/carddisp.pl?gene=STIM2
STK24	Serine/Threonine Kinase 24	STK3, HEL-S-95, MST3B, STE20, MST3, MST-3	http://www.genecards.org/cgi-bin/carddisp.pl?gene=STK24
STK38	Serine/Threonine Kinase 38	NDR1, NDR	http://www.genecards.org/cgi-bin/carddisp.pl?gene=STK38
STX4	Syntaxin 4	p35-2, STX4A	http://www.genecards.org/cgi-bin/carddisp.pl?gene=STX4
STX5	Syntaxin 5	SED5, STX5A	http://www.genecards.org/cgi-bin/carddisp.pl?gene=STX5
SUCLA2	Succinate-CoA Ligase ADP-Forming Beta Subunit	A-BETA, MTDPS5, SCS-betaA	http://www.genecards.org/cgi-bin/carddisp.pl?gene=SUCLA2
SUMO1	Small Ubiquitin-Like Modifier 1	PIC1, DAP1, OFC10, SENP2, SMT3, sentrin, UBL1, GMP1, SMT3C, SMT3H3, SUMO-1	http://www.genecards.org/cgi-bin/carddisp.pl?gene=SUMO1
SUMO3	Small Ubiquitin-Like Modifier 3	Smt3A, SMT3B, SUMO-2, SUMO-3, SMT3H1	http://www.genecards.org/cgi-bin/carddisp.pl?gene=SUMO3
SUPV3L1	Suv3 Like RNA Helicase	SUV3	http://www.genecards.org/cgi-bin/carddisp.pl?gene=SUPV3L1
SURF6	Surfeit 6	RRP14, SURF-6	http://www.genecards.org/cgi-bin/carddisp.pl?gene=SURF6
SVIL	Supervillin	supervillin, archvillin, p205/p250	http://www.genecards.org/cgi-bin/carddisp.pl?gene=SVIL
SYNE1	Spectrin Repeat Containing Nuclear Envelope Protein 1	8B, ARCA1, CPG2, EDMD4, Nesp1, SCAR8, dJ45H2.2, enaptin, C6orf98, MYNE1, KIAA0796, KIAA1262, KIAA1756, Myne-1, Syne-1	http://www.genecards.org/cgi-bin/carddisp.pl?gene=SYNE1
TACC3	Transforming Acidic Coiled-Coil Containing Protein 3	ERIC-1, ERIC1	http://www.genecards.org/cgi-bin/carddisp.pl?gene=TACC3
TAF4	TATA-Box Binding Protein Associated Factor 4	TAF2C, TAF4A, TAF(II)130, TAF(II)135, TAFII-130, TAFII-135, TAFII130, TAFII135, TAF2C1	http://www.genecards.org/cgi-bin/carddisp.pl?gene=TAF4
TAF6	TATA-Box Binding Protein Associated Factor 6	MGC:8964, TAFII85, TAF2E, TAF(II)70, TAF(II)80, TAFII-70, TAFII-80, TAFII70, TAFII80	http://www.genecards.org/cgi-bin/carddisp.pl?gene=TAF6
TAF9	TATA-Box Binding Protein Associated Factor 9	MGC:5067, TAFIID32, TAF2G, STAF31/32, TAFII-31, TAFII-32, TAFII31, TAFII32	http://www.genecards.org/cgi-bin/carddisp.pl?gene=TAF9
TANK	TRAF Family Member Associated NFKB Activator	TRAF2, I-TRAF, ITRAF	http://www.genecards.org/cgi-bin/carddisp.pl?gene=TANK
TAOK1	TAO Kinase 1	KFC-B, MAP3K16, MARKK, PSK-2, PSK2, hKFC-B, TAO1, hTAOK1, KIAA1361	http://www.genecards.org/cgi-bin/carddisp.pl?gene=TAOK1
TAP1	Transporter 1, ATP-Binding Cassette, Sub-Family B (MDR/TAP)	APT1, PSF1, Y3, ABC17, D6S114E, TAP1*0102N, TAP1N, ABCB2, PSF-1, RING4	http://www.genecards.org/cgi-bin/carddisp.pl?gene=TAP1
TAP2	Transporter 2, ATP-Binding Cassette, Sub-Family B (MDR/TAP)	PSF2, APT2, Y1, ABC18, D6S217E, ABCB3, PSF-2, RING11	http://www.genecards.org/cgi-bin/carddisp.pl?gene=TAP2
TAPBP	TAP Binding Protein (Tapasin)	NGS-17, NGS17, TAPA, TPN, TPSN	http://www.genecards.org/cgi-bin/carddisp.pl?gene=TAPBP
TAX1BP1	Tax1 Binding Protein 1	CALCOCO3, TXBP151, T6BP	http://www.genecards.org/cgi-bin/carddisp.pl?gene=TAX1BP1
TAX1BP3	Tax1 Binding Protein 3	TIP-1, TIP1	http://www.genecards.org/cgi-bin/carddisp.pl?gene=TAX1BP3
TBC1D24	TBC1 Domain Family Member 24	DFNA65, DOORS, EIEE16, FIME, TLDC6, DFNB86, KIAA1171	http://www.genecards.org/cgi-bin/carddisp.pl?gene=TBC1D24
TBCB	Tubulin Folding Cofactor B	CKAPI, CKAP1, CG22	http://www.genecards.org/cgi-bin/carddisp.pl?gene=TBCB
TCEA1	Transcription Elongation Factor A1	SII, TF2S, TCEA, GTF2S, TFIIS	http://www.genecards.org/cgi-bin/carddisp.pl?gene=TCEA1
TCEAL3	Transcription Elongation Factor A Like 3	WEX8	http://www.genecards.org/cgi-bin/carddisp.pl?gene=TCEAL3
TCOF1	Treacle Ribosome Biogenesis Factor 1	MFD1, TCS, TCS1, treacle	http://www.genecards.org/cgi-bin/carddisp.pl?gene=TCOF1
TES	Testin LIM Domain Protein	TESS-2, TESS	http://www.genecards.org/cgi-bin/carddisp.pl?gene=TES
TFPI2	Tissue Factor Pathway Inhibitor 2	REF1, PP5, TFPI-2	http://www.genecards.org/cgi-bin/carddisp.pl?gene=TFPI2
TGOLN2	Trans-Golgi Network Protein 2	48, TGN38, TTGN2, TGN46, TGN48, TGN51	http://www.genecards.org/cgi-bin/carddisp.pl?gene=TGOLN2
THG1L	TRNA-Histidine Guanylyltransferase 1 Like	IHG-1, hTHG1, ICF45	http://www.genecards.org/cgi-bin/carddisp.pl?gene=THG1L
THUMPD1	THUMP Domain Containing 1	TAN1	http://www.genecards.org/cgi-bin/carddisp.pl?gene=THUMPD1
TIMP1	TIMP Metallopeptidase Inhibitor 1	EPO, HCI, TIMP, EPA, TIMP-1, CLGI	http://www.genecards.org/cgi-bin/carddisp.pl?gene=TIMP1
TJAP1	Tight Junction Associated Protein 1	TJP4, PILT	http://www.genecards.org/cgi-bin/carddisp.pl?gene=TJAP1
TJP1	Tight Junction Protein 1	ZO-1, ZO1	http://www.genecards.org/cgi-bin/carddisp.pl?gene=TJP1
TLN1	Talin 1	ILWEQ, TLN, KIAA1027	http://www.genecards.org/cgi-bin/carddisp.pl?gene=TLN1
TMED8	Transmembrane P24 Trafficking Protein Family Member 8	FAM15B	http://www.genecards.org/cgi-bin/carddisp.pl?gene=TMED8
TMEM115	Transmembrane Protein 115	PP6, PL6	http://www.genecards.org/cgi-bin/carddisp.pl?gene=TMEM115
TMEM120A	Transmembrane Protein 120A	TMPIT, NET29	http://www.genecards.org/cgi-bin/carddisp.pl?gene=TMEM120A
TMEM173	Transmembrane Protein 173	ERIS, MPYS, NET23, SAVI, MITA, STING, hMITA, hSTING	http://www.genecards.org/cgi-bin/carddisp.pl?gene=TMEM173
TMEM184C	Transmembrane Protein 184C	TMEM34	http://www.genecards.org/cgi-bin/carddisp.pl?gene=TMEM184C
TMEM263	Transmembrane Protein 263	C12orf23	http://www.genecards.org/cgi-bin/carddisp.pl?gene=TMEM263
TMEM55B	Transmembrane Protein 55B	C14orf9	http://www.genecards.org/cgi-bin/carddisp.pl?gene=TMEM55B
TMEM57	Transmembrane Protein 57	MACOILIN	http://www.genecards.org/cgi-bin/carddisp.pl?gene=TMEM57
TMEM87B	Transmembrane Protein 87B		http://www.genecards.org/cgi-bin/carddisp.pl?gene=TMEM87B
TMF1	TATA Element Modulatory Factor 1	ARA160, TMF	http://www.genecards.org/cgi-bin/carddisp.pl?gene=TMF1
TMOD1	Tropomodulin 1	ETMOD, e-tropomodulin, D9S57E, TMOD, E-Tmod	http://www.genecards.org/cgi-bin/carddisp.pl?gene=TMOD1
TMPO	Thymopoietin	LAP2, CMD1T, TP, thymopoietin, PRO0868, LEMD4	http://www.genecards.org/cgi-bin/carddisp.pl?gene=TMPO
TMTC3	Transmembrane And Tetratricopeptide Repeat Containing 3	SMILE	http://www.genecards.org/cgi-bin/carddisp.pl?gene=TMTC3
TNC	Tenascin C	TN, GP, 150-225, cytotactin, neuronectin, DFNA56, HXB, GMEM, JI, TN-C, Hexabrachion, Tenascin-C	http://www.genecards.org/cgi-bin/carddisp.pl?gene=TNC
TNKS1BP1	Tankyrase 1 Binding Protein 1	TAB182, KIAA1741	http://www.genecards.org/cgi-bin/carddisp.pl?gene=TNKS1BP1
TOMM22	Translocase Of Outer Mitochondrial Membrane 22	TOM22, 1C9-2, MST065, MSTP065, hTom22	http://www.genecards.org/cgi-bin/carddisp.pl?gene=TOMM22
TOX4	TOX High Mobility Group Box Family Member 4	KIAA0737, LCP1, MIG7, C14orf92	http://www.genecards.org/cgi-bin/carddisp.pl?gene=TOX4
TPD52L2	Tumor Protein D52 Like 2	D54, TPD54, hD54	http://www.genecards.org/cgi-bin/carddisp.pl?gene=TPD52L2
TPM3	Tropomyosin 3	CFTD, NEM1, TRK, CAPM1, HEL-189, HEL-S-82p, OK/SW-cl.5, TM-5, TM3, TM30, TM30nm, TM5, TPMsk3, hscp30, tropomyosin-5, Gamma-tropomyosin, Tropomyosin-3, hTM5	http://www.genecards.org/cgi-bin/carddisp.pl?gene=TPM3
TPM4	Tropomyosin 4	HEL-S-108, tropomyosin-4, TM30p1	http://www.genecards.org/cgi-bin/carddisp.pl?gene=TPM4
TRAM1	Translocation Associated Membrane Protein 1	TRAMP, TRAM, PNAS8	http://www.genecards.org/cgi-bin/carddisp.pl?gene=TRAM1
TRIM21	Tripartite Motif Containing 21	SSA, Ro/SSA, ro(SS-A), SSA1, RNF81, RO52, SS-A	http://www.genecards.org/cgi-bin/carddisp.pl?gene=TRIM21
TRIM22	Tripartite Motif Containing 22	GPSTAF50, staf-50, RNF94, STAF50	http://www.genecards.org/cgi-bin/carddisp.pl?gene=TRIM22
TRIM25	Tripartite Motif Containing 25	Z147, ZNF147, EFP, RNF147	http://www.genecards.org/cgi-bin/carddisp.pl?gene=TRIM25
TRIM27	Tripartite Motif Containing 27	RFP, RNF76	http://www.genecards.org/cgi-bin/carddisp.pl?gene=TRIM27
TRIM38	Tripartite Motif Containing 38	RNF15, RORET	http://www.genecards.org/cgi-bin/carddisp.pl?gene=TRIM38
TRMT6	TRNA Methyltransferase 6	CGI-09, Gcd10p, KIAA1153, TRM6, GCD10	http://www.genecards.org/cgi-bin/carddisp.pl?gene=TRMT6
TRRAP	Transformation/Transcription Domain Associated Protein	TR-AP, TRA1, PAF350/400, PAF400, STAF40	http://www.genecards.org/cgi-bin/carddisp.pl?gene=TRRAP
TSC22D1	TSC22 Domain Family Member 1	Ptg-2, TGFB1I4, TSC22, KIAA1994	http://www.genecards.org/cgi-bin/carddisp.pl?gene=TSC22D1
TSPAN31	Tetraspanin 31	SAS, tspan-31	http://www.genecards.org/cgi-bin/carddisp.pl?gene=TSPAN31
TSPYL1	TSPY-Like 1	TSPY-like, TSPYL	http://www.genecards.org/cgi-bin/carddisp.pl?gene=TSPYL1
TTC28	Tetratricopeptide Repeat Domain 28	TPRBK, KIAA1043	http://www.genecards.org/cgi-bin/carddisp.pl?gene=TTC28
TTLL10	Tubulin Tyrosine Ligase Like 10	TTLL5	http://www.genecards.org/cgi-bin/carddisp.pl?gene=TTLL10
TXNDC9	Thioredoxin Domain Containing 9	PHLP3, APACD	http://www.genecards.org/cgi-bin/carddisp.pl?gene=TXNDC9
TYMP	Thymidine Phosphorylase	tdRPase, MNGIE, gliostatin, PD-ECGF, hPD-ECGF, MTDPS1, PDECGF, MEDPS1, ECGF, TP, ECGF1	http://www.genecards.org/cgi-bin/carddisp.pl?gene=TYMP
UBASH3B	Ubiquitin Associated And SH3 Domain Containing B	STS1, TULA-2, KIAA1959, p70, TULA2, STS-1	http://www.genecards.org/cgi-bin/carddisp.pl?gene=UBASH3B
UBQLN1	Ubiquilin 1	DSK2, UBQN, XDRP1, DA41, PLIC-1, hPLIC-1, PLIC1	http://www.genecards.org/cgi-bin/carddisp.pl?gene=UBQLN1
UBQLN2	Ubiquilin 2	DSK2, ALS15, CHAP1, HRIHFB2157, N4BP4, PLIC2, PLIC-2, hPLIC-2	http://www.genecards.org/cgi-bin/carddisp.pl?gene=UBQLN2
UBXN1	UBX Domain Protein 1	UBXD10, 2B28, SAKS1	http://www.genecards.org/cgi-bin/carddisp.pl?gene=UBXN1
UBXN4	UBX Domain Protein 4	erasin, UBXD2, UBXDC1, KIAA0242	http://www.genecards.org/cgi-bin/carddisp.pl?gene=UBXN4
UFM1	Ubiquitin-Fold Modifier 1	BM-002, C13orf20	http://www.genecards.org/cgi-bin/carddisp.pl?gene=UFM1
UIMC1	Ubiquitin Interaction Motif Containing 1	X2HRIP110, RAP80, RXRIP110	http://www.genecards.org/cgi-bin/carddisp.pl?gene=UIMC1
UMAD1	UBAP1-MVB12-Associated (UMA) Domain Containing 1	RPA3-AS1, RPA3OS	http://www.genecards.org/cgi-bin/carddisp.pl?gene=UMAD1
USP14	Ubiquitin Specific Peptidase 14	TGT	http://www.genecards.org/cgi-bin/carddisp.pl?gene=USP14
VAMP5	Vesicle Associated Membrane Protein 5	myobrevin, VAMP-5	http://www.genecards.org/cgi-bin/carddisp.pl?gene=VAMP5
VASP	Vasodilator-Stimulated Phosphoprotein		http://www.genecards.org/cgi-bin/carddisp.pl?gene=VASP
VCPIP1	Valosin Containing Protein (P97)/P47 Complex Interacting Protein 1	DUBA3, VCIP135, KIAA1850	http://www.genecards.org/cgi-bin/carddisp.pl?gene=VCPIP1
VIM	Vimentin	vimentin, CTRCT30, HEL113	http://www.genecards.org/cgi-bin/carddisp.pl?gene=VIM
VIMP	VCP Interacting Membrane Selenoprotein	AD-015, ADO15, SBBI8, SEPS1, SELS	http://www.genecards.org/cgi-bin/carddisp.pl?gene=VIMP
VPS41	VPS41, HOPS Complex Subunit	S53, HVPS41, HVSP41, hVps41p	http://www.genecards.org/cgi-bin/carddisp.pl?gene=VPS41
VTI1A	Vesicle Transport Through Interaction With T-SNAREs 1A	MMDS3, MVti1, VTI1RP2, Vti1-rp2	http://www.genecards.org/cgi-bin/carddisp.pl?gene=VTI1A
WARS	Tryptophanyl-TRNA Synthetase	cytoplasmic, WRS, GAMMA-2, trpRS, IFI53, IFP53, hWRS	http://www.genecards.org/cgi-bin/carddisp.pl?gene=WARS
WDR33	WD Repeat Domain 33	NET14, WDC146	http://www.genecards.org/cgi-bin/carddisp.pl?gene=WDR33
WDR37	WD Repeat Domain 37	KIAA0982	http://www.genecards.org/cgi-bin/carddisp.pl?gene=WDR37
WIPF1	WAS/WASL Interacting Protein Family Member 1	PRPL-2, WAS2, WASPIP, WIP	http://www.genecards.org/cgi-bin/carddisp.pl?gene=WIPF1
WWTR1	WW Domain Containing Transcription Regulator 1	TAZ	http://www.genecards.org/cgi-bin/carddisp.pl?gene=WWTR1
XRCC4	X-Ray Repair Complementing Defective Repair In Chinese Hamster Cells 4	SSMED	http://www.genecards.org/cgi-bin/carddisp.pl?gene=XRCC4
YARS	Tyrosyl-TRNA Synthetase	CMTDIC, TYRRS, YRS, YTS, cytoplasmic	http://www.genecards.org/cgi-bin/carddisp.pl?gene=YARS
YBX1	Y-Box Binding Protein 1	CBF-A, BP-8, CSDA2, CSDB, MDR-NF1, NSEP-1, NSEP1, DBPB, EFI-A, YB-1, YB1	http://www.genecards.org/cgi-bin/carddisp.pl?gene=YBX1
YIF1A	Yip1 Interacting Factor Homolog A, Membrane Trafficking Protein	FinGER7, YIF1P, YIF1, 54TM, 54TMp, HYIF1P	http://www.genecards.org/cgi-bin/carddisp.pl?gene=YIF1A
YIPF2	Yip1 Domain Family Member 2	FinGER2	http://www.genecards.org/cgi-bin/carddisp.pl?gene=YIPF2
YIPF5	Yip1 Domain Family Member 5	FinGER5, SB140, SMAP5, SMAP-5, YIP1A	http://www.genecards.org/cgi-bin/carddisp.pl?gene=YIPF5
YKT6	YKT6 V-SNARE Homolog (S. Cerevisiae)	R-SNARE	http://www.genecards.org/cgi-bin/carddisp.pl?gene=YKT6
YME1L1	YME1 Like 1 ATPase	PAMP, FTSH, MEG4, meg-4, YME1L, FTSH1	http://www.genecards.org/cgi-bin/carddisp.pl?gene=YME1L1
ZBTB7A	Zinc Finger And BTB Domain Containing 7A	FBI1, LRF, pokemon, TIP21, ZNF857A, ZBTB7, FBI-1	http://www.genecards.org/cgi-bin/carddisp.pl?gene=ZBTB7A
ZC2HC1A	Zinc Finger C2HC-Type Containing 1A	CGI-62, C8orf70, FAM164A	http://www.genecards.org/cgi-bin/carddisp.pl?gene=ZC2HC1A
ZC3H11A	Zinc Finger CCCH-Type Containing 11A	KIAA0663, ZC3HDC11A	http://www.genecards.org/cgi-bin/carddisp.pl?gene=ZC3H11A
ZC3H6	Zinc Finger CCCH-Type Containing 6	ZC3HDC6, KIAA2035	http://www.genecards.org/cgi-bin/carddisp.pl?gene=ZC3H6
ZCCHC6	Zinc Finger CCHC-Type Containing 6	HS2, TUTase7, PAPD6, TUT7, KIAA1711	http://www.genecards.org/cgi-bin/carddisp.pl?gene=ZCCHC6
ZCCHC8	Zinc Finger CCHC-Type Containing 8		http://www.genecards.org/cgi-bin/carddisp.pl?gene=ZCCHC8
ZFP91	ZFP91 Zinc Finger Protein	DMS-8, DSM-8, FKSG11, ZNF757, PZF, ZFP-91	http://www.genecards.org/cgi-bin/carddisp.pl?gene=ZFP91
ZMAT3	Zinc Finger Matrin-Type 3	WIG-1, PAG608, WIG1	http://www.genecards.org/cgi-bin/carddisp.pl?gene=ZMAT3
ZMPSTE24	Zinc Metallopeptidase STE24	HGPS, PRO1, Ste24p, FACE-1, FACE1, STE24	http://www.genecards.org/cgi-bin/carddisp.pl?gene=ZMPSTE24
ZMYND11	Zinc Finger MYND-Type Containing 11	MRD30, BRAM1, BS69	http://www.genecards.org/cgi-bin/carddisp.pl?gene=ZMYND11
ZNF24	Zinc Finger Protein 24	Zfp191, ZNF191, KOX17, RSG-A, ZSCAN3	http://www.genecards.org/cgi-bin/carddisp.pl?gene=ZNF24
ZNF281	Zinc Finger Protein 281	ZBP-99, ZNP-99, GZP1, ZBP99	http://www.genecards.org/cgi-bin/carddisp.pl?gene=ZNF281
ZNF638	Zinc Finger Protein 638	Zfp638, ZFML, NP220	http://www.genecards.org/cgi-bin/carddisp.pl?gene=ZNF638
ZNF787	Zinc Finger Protein 787	TIP20	http://www.genecards.org/cgi-bin/carddisp.pl?gene=ZNF787
ZNF830	Zinc Finger Protein 830	OMCG1, CCDC16	http://www.genecards.org/cgi-bin/carddisp.pl?gene=ZNF830
ZNFX1	Zinc Finger NFX1-Type Containing 1	KIAA1404	http://www.genecards.org/cgi-bin/carddisp.pl?gene=ZNFX1
ZYX	Zyxin	zyxin, ESP-2, HED-2, zyxin-2	http://www.genecards.org/cgi-bin/carddisp.pl?gene=ZYX

## Sheet: MeDeBO up Pathways
GeneAnalytics - Pathway results
Copyright © LifeMap Sciences, Inc.
	MeDeBO exposed to NK cells Vs Nil (proteins UP)
Statistics:
# Identified genes	658
# Matched genes	346
# Matched entities	58
Matching score statistics:
# High score matches	27
# Med score matches	31
# Low score matches	0
	The entities are assigned to wide functional categories identified by a color code (see also figure 5C):
	Response to immune cells
	Cell death
	Adhesion/Morphology/motility
	Oncogenic pathways
	Proliferation
	Response to stress
	Metabolism
	each entity can belong to 1 or more functional categories (i.e. color codes 1, 2, 3)
Results:
Score	SuperPath Name	color code1	color code2	color code3	# SuperPath Total Genes	# SuperPath Matched Genes	Matched Genes (Symbols)	Evidence URL
36.8166	Interferon Gamma Signaling				208	31	PML, ADAR, HLA-A, HLA-DRA, HLA-DRB1, HLA-DRB5, HLA-B, HLA-E, HLA-F, HLA-C, ICAM1, IFI35, IFIT1, IFIT3, SP100, MX1, IRF9, PSMB8, FLNB, NEDD4, NUPL2, OAS3, GBP2, GBP1, STAT1, SUMO1, TRIM21, TRIM22, TRIM25, TRIM38, CD44	http://pathcards.genecards.org/card/interferon_gamma_signaling
28.1044	Immune Response IFN Alpha/beta Signaling Pathway				92	18	PML, ADAR, HLA-A, HLA-B, HLA-E, HLA-F, HLA-C, IFI35, IFIT1, IFIT3, IL1B, MX1, IRF9, PSMB8, OAS3, GBP2, STAT1, CXCL8	http://pathcards.genecards.org/card/immune_response_ifn_alphabeta_signaling_pathway
27.8714	Influenza A				334	35	EEF1D, ACTB, PML, ADAR, HLA-A, HLA-DRA, HLA-DRB1, HLA-DRB5, HLA-B, HLA-E, HLA-F, HLA-C, HMGN1, HSPA6, ICAM1, IFIT1, MAP2K6, SP100, IL1B, MX1, IRF9, SRSF1, SRSF4, OAS3, STAT1, TAF4, TANK, TAF6, TAP1, TAP2, TRIM25, CD74, CD46, CREBBP, CXCL8	http://pathcards.genecards.org/card/influenza_a
27.1313	Immune System				1631	98	RIPK2, ACTB, GPRIN1, PML, ADAR, EVL, POLR1D, HLA-A, POLR2K, HLA-DRA, HLA-DRB1, HLA-DRB5, RNF213, HLA-B, HLA-E, HLA-F, HLA-C, HNRNPC, PPIG, HSPA5, ICAM1, IFI35, IFIT1, MAP2K6, IFIT3, SP100, IL1B, MX1, IL1RAP, PRKG1, IRF9, IRS2, ITPR1, ITGB3, MYH9, PSMA1, PSMA5, PSMC2, PSMB10, PSMB8, KLC1, KLC2, PSME1, PSME2, PSMD4, MEF2A, SQSTM1, FLNB, FN1, NCOR2, PVR, NEDD4, NFKB2, NUPL2, OAS3, RBCK1, RBBP6, GBP2…	http://pathcards.genecards.org/card/immune_system
25.1623	Epstein-Barr Virus Infection				215	26	POLR1D, HLA-A, POLR2K, HLA-DRA, HLA-DRB1, HLA-DRB5, HLA-B, HLA-E, HLA-F, HLA-C, HSPA6, ICAM1, MAP2K6, PSMC2, PSMD4, PTMA, NCOR2, NEDD4, NFKB2, RELB, TANK, VIM, CD58, CD40, CD44, CREBBP	http://pathcards.genecards.org/card/epstein-barr_virus_infection
24.2627	Antigen Presentation- Folding, Assembly and Peptide Loading of Class I MHC				28	10	HLA-A, HLA-B, HLA-E, HLA-F, HLA-C, HSPA5, SEC24D, TAP1, TAP2, TAPBP	http://pathcards.genecards.org/card/antigen_presentation-_folding_assembly_and_peptide_loading_of_class_i_mhc
22.5842	Vesicle-mediated Transport				500	41	GCC1, GCC2, GOLGB1, GOLIM4, GOLGA2, GORASP1, GOSR1, GOSR2, PLIN3, LRP1, HGS, LMAN1, EXOC6, PRKAB2, KLC1, KLC2, NAA30, RAB13, FTH1, FTL, STAM2, PICALM, SCFD1, SEC16A, SEC24D, AP1S1, STX4, STX5, TGOLN2, TJP1, TMEM115, TMF1, VTI1A, YKT6, ARFGAP3, BLOC1S3, CALM2, CD55, CHMP4A, COG3, CTAGE5	http://pathcards.genecards.org/card/vesicle-mediated_transport
22.4813	Viral MRNA Translation				618	47	KYNU, EEF1D, SMG1, SMG7, MRPL12, MRPL14, MRPL27, EIF1AX, EIF2S2, MRPS10, MRPS18A, EIF3J, GSPT2, EIF4EBP1, EIF6, IDO1, FAM3A, FAU, PSMA1, PSMA5, PSMC2, PSMB10, PSMB8, PSME1, PSME2, PSPH, PSMD4, SQRDL, RPL19, PYCR1, SRP54, RPL26, RPL29, RBM8A, PHGDH, RPLP2, RPS12, RPS19, RPS21, RSL24D1, RPS6KA3, RPS6KB1, SEC61B, SEC61G, TRAM1, BCKDK, CBS	http://pathcards.genecards.org/card/viral_mrna_translation
21.9146	Transport to The Golgi and Subsequent Modification				1181	73	EEF1D, SMC5, GFER, GFPT1, GFPT2, ACTB, EIF1AX, EIF2S2, GOLGB1, GOLGA2, GORASP1, GOSR1, GOSR2, EIF3J, PLAUR, GSPT2, PML, PMM2, EIF4EBP1, EIF5A2, EIF6, HIST1H2AC, LMAN1, HIST2H2AC, HIST1H2BI, LMNA, HDGF, EXOC6, HNRNPC, HSPA5, HSPA9, HSPG2, IGFBP2, SP100, FAU, RPL19, SRP54, RPL26, RPL29, NSMCE2, NUPL2, PGM3, RPLP2, RPS12, RPS19, RPS21, RSL24D1, SENP1, SCFD1, SEMA5A, SEC16A, SEC24D, SEC61B, SEC61G, S…	http://pathcards.genecards.org/card/transport_to_the_golgi_and_subsequent_modification
19.2188	Allograft Rejection				268	26	ABL2, ACTB, HLA-A, HLA-DRA, HLA-DRB1, HLA-DRB5, HLA-B, HLA-E, HLA-F, HLA-C, HSPA5, HSPA6, ICAM1, IL1B, PSME1, PSME2, RAC2, STAT1, TAP1, TAP2, TAPBP, CASP7, CD55, CD40, CD74, CTSS	http://pathcards.genecards.org/card/allograft_rejection
18.3455	Interleukin-3, 5 and GM-CSF Signaling				1382	78	RIPK2, PLAT, GPRIN1, PML, EIF4EBP1, ADAR, HGS, HLA-A, POLR2K, HLA-DRA, HLA-DRB1, HLA-DRB5, HLA-B, HLA-E, HLA-F, HLA-C, ICAM1, IFI35, IFIT1, MAP2K6, IFIT3, SP100, IL1B, MX1, IL1RAP, PRKAB2, IRF9, IRS2, PRNP, ITPR1, ITGB3, PSMA1, PSMA5, PSMC2, PSMB10, PSMB8, PSME1, PSME2, PTBP1, PSMD4, MEF2A, SQSTM1, FLNB, FN1, NEDD4, NGFR, NFKB2, NRP1, NUPL2, OAS3, GBP2, STAM2, GBP1, STAT1, RELB, PHB, RTN4, RPS6KA…	http://pathcards.genecards.org/card/interleukin-3_5_and_gm-csf_signaling
18.1912	Cell Adhesion Molecules (CAMs)				148	18	GLG1, HLA-A, HLA-DRA, HLA-DRB1, HLA-DRB5, HLA-B, HLA-E, HLA-F, HLA-C, ICAM1, JAM3, ALCAM, PVR, SDC4, CADM1, CD58, CD40, CDH2	http://pathcards.genecards.org/card/cell_adhesion_molecules_(cams)
18.0808	Apoptotic Pathways in Synovial Fibroblasts				777	51	SLTM, RHOB, GFER, ACTB, EIF1AX, GLG1, GMFG, EIF2S2, EIF3J, PLAUR, GTF2A1, GTF2H3, PML, RND3, EIF5A2, EIF6, HDGF, LTBP3, PPIG, PPP1R12A, PPP1R9B, MAP2K6, IL1B, ITGA3, ITPR1, ITGB3, MEF2A, NGFR, FOSL1, NRP1, RAC2, OGFR, PARP14, PARP9, RPS6KA3, SEMA5A, RPS6KB1, TAF4, TANK, TAF6, TAF9, TIMP1, TYMP, ARHGEF11, ARHGEF2, ARHGEF12, BAD, CASP4, CASP7, CD44, CREBBP	http://pathcards.genecards.org/card/apoptotic_pathways_in_synovial_fibroblasts
17.972	Semaphorin Interactions				93	14	SLTM, RHOB, PPP1R12A, MYH9, KIF14, MYL6, FLNA, NRP1, RAC2, SEMA5A, TLN1, ARHGEF11, ARHGEF12, CALM2	http://pathcards.genecards.org/card/semaphorin_interactions
17.1372	Normal WtCFTR Traffic / ER-to-Golgi				141	17	GCC2, ACTB, GOSR1, PLIN3, HGS, FLNA, FLNB, OPTN, STAM2, PICALM, SEC24D, SH3GLB1, AP1S1, STX5, VTI1A, YKT6, CHMP4A	http://pathcards.genecards.org/card/normal_wtcftr_traffic__er-to-golgi_
16.4517	Apoptotic Cleavage of Cellular Proteins				178	19	PLEC, H1F0, LMNA, HIST1H1D, PSMA1, PSMA5, PSMC2, PSMB10, PSMB8, PSME1, PSME2, PSMD4, STK24, TANK, APC, TJP1, VIM, BAD, CASP7	http://pathcards.genecards.org/card/apoptotic_cleavage_of_cellular_proteins
16.2185	Phagosome				164	18	ACTB, HGS, HLA-A, HLA-DRA, HLA-DRB1, HLA-DRB5, HLA-B, HLA-E, HLA-F, HLA-C, ITGB3, SEC61B, SEC61G, TAP1, TAP2, ATP6V0A4, CORO1A, CTSS	http://pathcards.genecards.org/card/phagosome
15.8906	Unfolded Protein Response (UPR)				92	13	GFPT1, GOSR2, LMNA, HDGF, HSPA5, SEC61B, SEC61G, SHC1, TLN1, YIF1A, ARFGAP3, ATF6, CXCL8	http://pathcards.genecards.org/card/unfolded_protein_response_(upr)
15.8809	Phospholipase-C Pathway				543	38	SLTM, RHOB, GFER, ACTB, GLG1, GMFG, RND3, HDGF, LMNB2, LTBP3, PPP1R12A, HSPG2, ITGA3, ITPR1, ITGB3, PSMA1, PSMA5, PSMC2, PSMD4, MEF2A, FN1, NGFR, NFAT5, NRP1, RAC2, OGFR, PDCD6IP, RPS6KA3, SEMA5A, RPS6KB1, TIMP1, TNC, TYMP, ARHGEF11, ARHGEF2, ARHGEF12, CALM2, CREBBP	http://pathcards.genecards.org/card/phospholipase-c_pathway
15.0806	Antigen Processing- Ubiquitination and Proteasome Degradation				355	28	PML, HLA-A, RNF213, HLA-B, HLA-E, HLA-F, HLA-C, HSPA5, PSMA1, PSMA5, PSMC2, PSMB10, PSMB8, PSME1, PSME2, PSMD4, NEDD4, RBCK1, RBBP6, SEC24D, SEC61B, SEC61G, TAP1, TAP2, TAPBP, TRIM21, CTSS, DTX3L	http://pathcards.genecards.org/card/antigen_processing-_ubiquitination_and_proteasome_degradation
14.9046	TCR Signaling (REACTOME)				128	15	RIPK2, EVL, HLA-DRA, HLA-DRB1, HLA-DRB5, PSMA1, PSMA5, PSMC2, PSMB10, PSMB8, PSME1, PSME2, PSMD4, NCOR2, VASP	http://pathcards.genecards.org/card/tcr_signaling_(reactome)
14.9046	SMAD Signaling Network				128	15	ACTB, JUNB, PSMA1, PSMA5, JUND, PSMC2, PSMB10, PSMB8, PSMD4, FLNA, FLNB, FLNC, FOSL1, ATF6, CREBBP	http://pathcards.genecards.org/card/smad_signaling_network
14.2192	Developmental Biology				861	51	SLTM, ABL2, RHOB, ACTB, GPRIN1, HELZ2, HIST1H2AC, EVL, HIST2H2AC, HIST1H2BI, POLR2K, MAP2K6, IRS2, PRNP, ITGB3, MYH9, PSMA1, PSMA5, PSMC2, PSMB10, MYL6, PSMB8, PSME1, PSME2, PSMD4, MEF2A, MED25, ALCAM, FN1, NCOR2, SRGAP2, NRP1, RAC2, NUMB, ANGPTL4, PHB, RPS6KA3, SEMA5A, SERPINB8, SHC1, TLN1, VASP, ARHGEF11, ARHGEF12, CALM2, CDH2, CEBPB, CHL1, CNOT9, CREBBP, DRAP1	http://pathcards.genecards.org/card/developmental_biology
14.1965	Actin Nucleation By ARP-WASP Complex				368	28	SLTM, RHOB, ACTB, RND3, HLA-A, HLA-DRA, HLA-DRB1, HLA-DRB5, HLA-B, HLA-E, EXOC6, HLA-F, LMTK2, HLA-C, PPP1R12A, ITGA3, ITGB3, MYH9, MYL6, FN1, RAC2, TLN1, WIPF1, VASP, ARHGEF11, ARHGEF2, ARHGEF12, CDC42BPA	http://pathcards.genecards.org/card/actin_nucleation_by_arp-wasp_complex
14.1173	Infectious Disease				773	47	GTF2A1, GTF2H3, PODXL, HLA-A, POLR2K, HMGA1, HSPG2, MAP2K6, FAU, IRS2, PSMA1, PSMA5, PSMC2, PSMB10, PSMB8, PSME1, PSME2, PSMD4, MIB1, RPL19, NCOR2, NFKB2, RPL26, RPL29, NUPL2, PDCD6IP, STAT1, RPLP2, RPS12, RPS19, RPS21, RSL24D1, SDC4, SEMA5A, SHC1, AP1S1, TAF4, TAF6, TCEA1, TAF9, APC, XRCC4, BAD, CALM2, CDC37, CHMP4A, CREBBP	http://pathcards.genecards.org/card/infectious_disease
13.9324	TNF-alpha/NF-kB Signaling Pathway *				203	19	RIPK2, GLG1, PML, POLR1D, PPIG, MARK2, PSMC2, FKBP5, FLNA, NFKB2, STAT1, RELB, RPS6KB1, SUMO1, TANK, CASP7, CDC37, CREBBP, DNPEP	http://pathcards.genecards.org/card/tnf-alphanf-kb_signaling_pathway
13.7008	Development VEGF Signaling Via VEGFR2 - Generic Cascades				171	17	ACTB, PLAUR, ICAM1, PRKD2, ITPR1, ITGB3, JUNB, JUND, PTGS2, FOSL1, NFKB2, NRP1, RELB, SDC4, SHC1, BAD, CD44	http://pathcards.genecards.org/card/development_vegf_signaling_via_vegfr2_-_generic_cascades
13.1089	BDNF Signaling Pathway				160	16	EIF2S2, GPRIN1, EIF4EBP1, IRS2, MARCKS, MEF2A, SQSTM1, NGFR, STAT1, RPS6KA3, RPS6KB1, SHC1, APC, YBX1, BAD, CDH2	http://pathcards.genecards.org/card/bdnf_signaling_pathway
13.0488	Sertoli-Sertoli Cell Junction Dynamics				427	30	RHOB, ACTB, GOSR1, GOSR2, RND3, EXOC6, MAP2K6, PRKG1, ITGA3, ITGB3, MARK2, JAM3, MYH9, JUNB, JUND, MYL6, FOSL1, RAB23, RAB13, RAC2, PDCD6IP, STX4, STX5, TJAP1, TJP1, VASP, ARHGEF2, ZYX, ATF6, CDH2	http://pathcards.genecards.org/card/sertoli-sertoli_cell_junction_dynamics
12.9285	Toll Comparative Pathway				113	13	HMGA1, MAP2K6, IL1B, IL1RAP, JUNB, JUND, PTGS2, FOSL1, STAT1, ATF6, CALM2, CEBPB, CXCL8	http://pathcards.genecards.org/card/toll_comparative_pathway
12.913	Development_Glucocorticoid Receptor Signaling				44	8	HSPA5, HSPA9, HSPA6, NFKB2, RELB, SUMO1, CEBPB, CREBBP	http://pathcards.genecards.org/card/development_glucocorticoid_receptor_signaling
12.9031	CLEC7A (Dectin-1) Signaling				129	14	IL1B, ITPR1, PSMA1, PSMA5, PSMC2, PSMB10, PSMB8, PSME1, PSME2, PSMD4, NFKB2, RELB, CALM2, CREBBP	http://pathcards.genecards.org/card/clec7a_(dectin-1)_signaling
12.6269	Regulation of Glucokinase By Glucokinase Regulatory Protein *				218	19	POLR2K, LMNA, HMGA1, HK2, HNRNPC, HOOK3, EMD, IFIT1, MX1, FLNB, NEDD4, NUPL2, STAT1, PHAX, SUMO3, SUMO1, SLC2A3, TMPO, TRIM25	http://pathcards.genecards.org/card/regulation_of_glucokinase_by_glucokinase_regulatory_protein
12.4752	FMLP Pathway				355	26	SLTM, ACTB, GPRIN1, PPP1R12A, MAP2K6, ITPR1, PSMA1, PSMA5, PSMC2, PSMB10, MYL6, PSMB8, PSMD4, MEF2A, SQSTM1, NCOR2, NFAT5, NFKB2, RAC2, RELB, TAF4, ARHGEF11, ARHGEF2, ARHGEF12, CALM2, CREBBP	http://pathcards.genecards.org/card/fmlp_pathway
12.1957	Tuberculosis				187	17	RIPK2, HLA-DRA, HLA-DRB1, HLA-DRB5, PPIG, HSPA9, IL1B, STAT1, ARHGEF12, ATP6V0A4, BAD, CALM2, CD74, CEBPB, CORO1A, CREBBP, CTSS	http://pathcards.genecards.org/card/tuberculosis
12.1441	Gene Expression				1750	85	AARS, EEF1D, SMG1, SMG7, ACTB, EIF1AX, EIF2S2, EIF3J, GSPT2, GTF2A1, GTF2H3, PML, EIF4EBP1, SNRNP27, HELZ2, ADAR, EIF6, HIST1H2AC, POLR1D, HIST2H2AC, HIST1H2BI, POLR2K, POP7, LSM1, SNU13, HNRNPC, PPIG, IGF2BP2, PRKAB2, FAU, JUNB, PSMA1, PSMA5, PSMC2, PSMB10, PSMB8, PSME1, PSME2, PTBP1, PSMD4, METTL1, MED25, RPL19, PTRF, NABP2, NCOR2, NDRG1, SRP54, RPL26, NOP2, SRSF1, RPL29, SRSF4, NUPL2, PARS2, R…	http://pathcards.genecards.org/card/gene_expression
12.0211	Immune Response IFN Gamma Signaling Pathway				75	10	ICAM1, MAP2K6, AFAP1, IL1B, IRF9, ITPR1, STAT1, CALM2, CEBPB, CREBBP	http://pathcards.genecards.org/card/immune_response_ifn_gamma_signaling_pathway
11.8307	IL12-mediated Signaling Events				91	11	RIPK2, GZMA, HLA-A, HLA-DRA, HLA-DRB1, MAP2K6, IL1B, NCOR2, NFKB2, STAT1, RELB	http://pathcards.genecards.org/card/il12-mediated_signaling_events
11.5072	Protein Processing in Endoplasmic Reticulum				177	16	LMAN1, HSPA5, HSPA6, RRBP1, SEC24D, SEC61B, SEC61G, SIL1, TANK, TRAM1, UBQLN1, UBQLN2, VIMP, ATF6, ATXN3, CHMP1B	http://pathcards.genecards.org/card/protein_processing_in_endoplasmic_reticulum
11.2343	P70S6K Signaling				418	28	SLTM, RHOB, GFER, GLG1, GMFG, EIF3J, EIF4EBP1, RND3, EIF6, HDGF, LTBP3, PPP1R12A, PPP1R9B, MAP2K6, ITPR1, PTGS2, NGFR, NRP1, RAC2, OGFR, STAT1, RPS6KA3, SEMA5A, RPS6KB1, TIMP1, TYMP, BAD, CREBBP	http://pathcards.genecards.org/card/p70s6k_signaling
11.1115	ERK Signaling				1260	64	SLTM, ABL2, RHOB, GFER, ACTB, GLG1, GMFG, RND3, HDGF, LMNB2, LTBP3, LMTK2, HMGN1, PPIG, PPP1R12A, HSPG2, PPP1R9B, MAP2K6, SOX5, IL1B, PRKAB2, IRS2, ITGA3, ITGB3, MYH9, JUNB, JUND, MYL6, PTGS2, MEF2A, FLNA, FLNB, FLNC, FN1, NGFR, FOSL1, NRP1, RAC2, NUMB, OGFR, STAT1, RPS6KA3, SEMA5A, TANK, APC, TLN1, TIMP1, TNC, TYMP, VIM, WIPF1, ARHGEF11, ARHGEF2, ARHGEF12, ATF6, BAD, CASP7, CD40, CDH19, CDH2, CE…	http://pathcards.genecards.org/card/erk_signaling
11.0833	Activation of The MRNA Upon Binding of The Cap-binding Complex and EIFs, and Subsequent Binding to 43S				67	9	EIF1AX, EIF2S2, EIF3J, EIF4EBP1, EIF6, FAU, RPS12, RPS19, RPS21	http://pathcards.genecards.org/card/activation_of_the_mrna_upon_binding_of_the_cap-binding_complex_and_eifs_and_subsequent_binding_to_43s
10.9322	Regulation of Degradation of DeltaF508 CFTR in CF				68	9	HSPA5, HSPA9, HSPA6, PSMA1, PSMA5, SEC61B, SEC61G, ATXN3, CHMP1B	http://pathcards.genecards.org/card/regulation_of_degradation_of_deltaf508_cftr_in_cf
10.8886	GPCR Pathway				761	43	SLTM, RHOB, GFER, ACTB, GLG1, GMFG, GTF2A1, GTF2H3, RND3, HLA-DRA, HLA-DRB1, HDGF, HLA-DRB5, LTBP3, LMTK2, PPP1R12A, PPP1R9B, MAP2K6, ITGA3, ITPR1, ITGB3, PTGS2, PTPN12, NCOR2, NGFR, NFAT5, NRP1, RAC2, OGFR, STAT1, SEMA5A, TAF4, TAF6, TAF9, TLN1, TIMP1, TYMP, ARFGAP3, ARHGEF11, ARHGEF2, ARHGEF12, CALM2, CREBBP	http://pathcards.genecards.org/card/gpcr_pathway
10.7877	Retrograde Transport at The Trans-Golgi-Network				55	8	GCC1, GCC2, PLIN3, NAA30, TGOLN2, TMF1, VTI1A, COG3	http://pathcards.genecards.org/card/retrograde_transport_at_the_trans-golgi-network
10.5274	Assembly of RNA Polymerase-II Initiation Complex				118	12	RHOB, GTF2A1, GTF2H3, RND3, POLR2K, MEF2A, NCOR2, TAF4, TAF6, TCEA1, TAF9, CREBBP	http://pathcards.genecards.org/card/assembly_of_rna_polymerase-ii_initiation_complex
10.4275	Golgi-to-ER Retrograde Transport				190	16	GCC1, GCC2, GOLIM4, GOSR1, GOSR2, PLIN3, KLC1, KLC2, NAA30, STX5, TGOLN2, TMF1, VTI1A, YKT6, ARFGAP3, COG3	http://pathcards.genecards.org/card/golgi-to-er_retrograde_transport
10.4013	Proteolysis Putative SUMO-1 Pathway				44	7	PML, SP100, NFKB2, RELB, SENP1, SUMO1, CREBBP	http://pathcards.genecards.org/card/proteolysis_putative_sumo-1_pathway
10.3587	Immune Response_MIF-mediated Glucocorticoid Regulation				32	6	ICAM1, PTGS2, NFKB2, RELB, CD74, CXCL8	http://pathcards.genecards.org/card/immune_response_mif-mediated_glucocorticoid_regulation
10.3381	Regulation of PLK1 Activity at G2/M Transition				210	17	PPP1R12A, PSMA1, PSMA5, PSMC2, PSMB10, PSMB8, PSME1, PSME2, PSMD4, OFD1, OPTN, PCM1, PHLDA1, CEP250, CEP131, CEP41, CENPF	http://pathcards.genecards.org/card/regulation_of_plk1_activity_at_g2m_transition
10.156	PAK Pathway				734	41	SLTM, RHOB, GFER, ACTB, GLG1, GLRX, GMFG, RND3, HDGF, LMO7, LTBP3, PPIG, PPP1R12A, IL1B, MYH9, MYL6, FLNA, FLNB, FLNC, PTPN12, PTPRS, NGFR, NRP1, RAC2, OGFR, PDCD6IP, SEMA5A, SLC2A3, TIMP1, TJP1, TYMP, ARFGAP3, ZYX, CASP4, CASP7, CD40, CDH2, CEBPB, CREBBP, CXCL8, DNPEP	http://pathcards.genecards.org/card/pak_pathway
10.0816	Blood-Brain Barrier and Immune Cell Transmigration: Pathways Overview				74	9	ACTB, LRP1, LMNB2, HSPG2, ITGA3, ITGB3, JAM3, FN1, CDH2	http://pathcards.genecards.org/card/blood-brain_barrier_and_immune_cell_transmigration_pathways_overview
9.98745	Initiation of Nuclear Envelope Reformation				13	4	LMNA, EMD, ANKLE2, TMPO	http://pathcards.genecards.org/card/initiation_of_nuclear_envelope_reformation
9.87265	Osteoclast Differentiation				142	13	MAP2K6, IL1B, IRF9, ITGB3, JUNB, JUND, FHL2, SQSTM1, FOSL1, NFKB2, STAT1, RELB, TANK	http://pathcards.genecards.org/card/osteoclast_differentiation
9.86874	Translation Insulin Regulation of Translation				359	24	SLTM, GFPT1, GFPT2, EIF2S2, PLAT, PLAUR, EIF4EBP1, HK2, HOOK3, MAP2K6, PRKAB2, INPP5K, IRS2, JUNB, STAT1, RPS6KA3, SERPINB2, RPS6KB1, SHC1, SLC27A4, BAD, CALM2, CEBPB, CPT1A	http://pathcards.genecards.org/card/translation_insulin_regulation_of_translation
9.85586	Tacrolimus/Cyclosporine Pathway, Pharmacodynamics				47	7	MAFF, MAP2K6, JUNB, JUND, FOSL1, NFKB2, RELB	http://pathcards.genecards.org/card/tacrolimuscyclosporine_pathway_pharmacodynamics
9.83319	Focal Adhesion				297	21	SLTM, RHOB, ACTB, LMNB2, PPP1R12A, MAP2K6, ITGA3, ITGB3, MYL6, PTGS2, FLNA, FLNB, FLNC, FN1, RAC2, SHC1, TLN1, TNC, VASP, ZYX, BAD	http://pathcards.genecards.org/card/focal_adhesion
9.7211	TGF-Beta Pathway				699	39	SLTM, GFER, GMFG, EIF4EBP1, HDGF, LTBP3, LMTK2, MAP1B, MAP2K6, IL1B, IRF9, IRS2, ITGA3, ITGB3, PSMA1, PSMA5, PSMC2, PSMB10, PSMB8, PSMD4, METAP2, NGFR, RAC2, OGFR, STAT1, RPS6KA3, SEMA5A, RPS6KB1, SUMO3, SUMO1, TANK, TIMP1, TYMP, ARHGEF11, ARHGEF2, ARHGEF12, CEBPB, CREBBP, CXCL8	http://pathcards.genecards.org/card/tgf-beta_pathway

## Sheet: MeDeBO up GO BP
GeneAnalytics - Function-based Analysis, GO-Biological Process results
Copyright © LifeMap Sciences, Inc.
	MeDeBO exposed to NK cells Vs Nil (proteins UP)
Statistics:
# Identified genes	658
# Matched genes	301
# Matched entities	45
Matching score statistics:
# High score matches	27
# Med score matches	18
# Low score matches	0
	The entities are assigned to wide functional categories identified by a color code (see also figure 5C):
	Response to immune cells
	Cell death
	Adhesion/Morphology/motility
	Oncogenic pathways
	Proliferation
	Response to stress
	Metabolism
	each entity can belong to 1 or more functional categories (i.e. color codes 1, 2, 3)
Results
Score	Name	color code 1	# Genes	# Matched Genes	Matched Genes (Symbols)	Evidence URL
44.3205	Interferon-gamma-mediated Signaling Pathway		77	22	PML, HLA-A, HLA-DRA, HLA-DRB1, HLA-DRB5, HLA-B, HLA-E, HLA-F, HLA-C, ICAM1, SP100, IRF9, OAS3, GBP2, GBP1, STAT1, SUMO1, TRIM21, TRIM22, TRIM25, TRIM38, CD44	http://amigo.geneontology.org/amigo/term/GO:0060333
37.7999	Viral Process		557	54	GTF2A1, GTF2H3, PML, HLA-A, POLR2K, HLA-DRA, HLA-DRB1, HLA-B, HMGA1, HLA-C, SP100, SP110, FAU, PSMA1, PSMA5, PSMC2, PSMB10, PSMB8, KLC1, PSME1, PSME2, PSMD4, RPL19, PVR, RPL26, RPL29, NUPL2, RBCK1, PDCD6IP, STAT1, RPLP2, RPS12, RPS19, RPS21, SHC1, AP1S1, SUMO1, TAF4, TAF6, TCEA1, TAF9, TLN1, TRAM1, TRIM22, TRIM25, VIM, XRCC4, ZMYND11, ZYX, BNIP3, CALCOCO2, CD46, CHMP4A, CREBBP	http://amigo.geneontology.org/amigo/term/GO:0016032
34.4099	Antigen Processing and Presentation of Exogenous Peptide Antigen Via MHC Class I		79	19	HLA-A, HLA-B, HLA-E, HLA-F, HLA-C, PSMA1, PSMA5, PSMC2, PSMB10, PSMB8, PSME1, PSME2, PSMD4, SEC61B, SEC61G, TAP1, TAP2, TAPBP, CTSS	http://amigo.geneontology.org/amigo/term/GO:0042590
32.6694	Antigen Processing and Presentation of Exogenous Peptide Antigen Via MHC Class I, TAP-dependent		75	18	HLA-A, HLA-B, HLA-E, HLA-F, HLA-C, PSMA1, PSMA5, PSMC2, PSMB10, PSMB8, PSME1, PSME2, PSMD4, SEC61B, SEC61G, TAP1, TAP2, TAPBP	http://amigo.geneontology.org/amigo/term/GO:0002479
32.5402	Cytokine-mediated Signaling Pathway		279	34	PML, ADAR, HLA-A, HLA-DRA, HLA-DRB1, HLA-DRB5, HLA-B, HLA-E, HLA-F, HLA-C, ICAM1, IFI35, IFIT1, IFIT3, SP100, IL1B, MX1, IL1RAP, IRF9, PSMB8, FLNB, NEDD4, NUPL2, OAS3, GBP2, GBP1, STAT1, SUMO1, TRIM21, TRIM22, TRIM25, TRIM38, BAD, CD44	http://amigo.geneontology.org/amigo/term/GO:0019221
31.7632	Antigen Processing and Presentation of Peptide Antigen Via MHC Class I		99	20	HLA-A, HLA-B, HLA-E, HLA-F, HLA-C, PSMA1, PSMA5, PSMC2, PSMB10, PSMB8, PSME1, PSME2, PSMD4, SEC24D, SEC61B, SEC61G, TAP1, TAP2, TAPBP, CTSS	http://amigo.geneontology.org/amigo/term/GO:0002474
30.7109	Gene Expression		932	69	AARS, EEF1D, SMG1, SMG7, EIF1AX, EIF2S2, GOLPH3, EIF3J, GSPT2, GTF2A1, GTF2H3, EIF4EBP1, ADAR, POLR1D, POLR2K, POP7, LSM1, SNU13, HNRNPC, IGF2BP2, PRKAB2, FAU, JUNB, PSMA1, PSMA5, PSMC2, PSMB10, PSMB8, PSME1, PSME2, PTBP1, PSMD4, METTL1, MED25, RPL19, PTRF, NCOR2, SRP54, RPL26, SRSF1, RPL29, SRSF4, NUPL2, PARS2, RBMX, RBM8A, PHAX, RPLP2, RPP25, RPS12, RPS19, RPS21, SESN2, SEC61B, SEC61G, TAF4, TA…	http://amigo.geneontology.org/amigo/term/GO:0010467
30.6691	Negative Regulation of Apoptotic Process		529	48	AAMDC, RHBDD1, RIPK2, GOLPH3, PLAUR, ADAR, HMGA2, HMGCR, PPIF, HSPA5, HSPA9, HSPA6, SOD2, IFIT3, PRNP, PSMA1, PSMA5, PSMC2, PSMB10, KIF14, PSMB8, PSME1, FHL2, PSME2, PSMD4, SQSTM1, FLNA, MIEN1, NGFR, ANGPTL4, PHB, RPS6KA3, ANXA1, SERPINB2, SETX, RPS6KB1, SUPV3L1, TAX1BP1, TAF9, APC, TIMP1, TMF1, TSC22D1, ATG5, BAG3, BNIP3, CD44, CD74	http://amigo.geneontology.org/amigo/term/GO:0043066
28.022	Type I Interferon Signaling Pathway		71	16	ADAR, HLA-A, HLA-B, HLA-E, HLA-F, HLA-C, IFI35, IFIT1, IFIT3, SP100, MX1, IRF9, PSMB8, OAS3, GBP2, STAT1	http://amigo.geneontology.org/amigo/term/GO:0060337
26.4896	Cellular Protein Metabolic Process		776	58	EEF1D, SMC5, GFER, GFPT1, GFPT2, ACTB, EIF1AX, EIF2S2, GOLGA2, GORASP1, GOSR2, EIF3J, PLAUR, GSPT2, PML, PMM2, EIF4EBP1, EIF5A2, LMAN1, LMNA, HDGF, EXOC6, HSPA5, HSPA9, HSPG2, IGFBP2, SP100, FAU, RPL19, SRP54, RPL26, RPL29, NSMCE2, NUPL2, PGM3, RPLP2, RPS12, RPS19, RPS21, SENP1, SCFD1, SEC16A, SEC24D, SEC61B, SEC61G, SHC1, SUMO3, SUMO1, STX5, TBCB, TLN1, TOMM22, TRAM1, XRCC4, YIF1A, ATF6, CTAGE5,…	http://amigo.geneontology.org/amigo/term/GO:0044267
20.8287	Apoptotic Process		644	47	SLK, RHBDD1, SLTM, RHOB, RIPK2, PLEC, PLEKHF1, PML, GZMA, GULP1, H1F0, HINT2, LMNA, MAP2K6, IL1B, MX1, PSMA1, PSMA5, PSMC2, PSMB10, PSMB8, PSME1, PSME2, PSMD4, MEF2A, MIEN1, PDCD6IP, STAT1, PHLDA1, RTN4, STK24, RPS6KB1, SH3GLB1, SH3KBP1, TAX1BP1, APC, TJP1, TMEM173, VIM, YARS, ZMAT3, ATG5, BAD, BNIP3, CADM1, CASP4, CASP7	http://amigo.geneontology.org/amigo/term/GO:0006915
20.4231	Antigen Processing and Presentation of Exogenous Peptide Antigen Via MHC Class I, TAP-independent		9	6	HLA-A, HLA-B, HLA-E, HLA-F, HLA-C, CTSS	http://amigo.geneontology.org/amigo/term/GO:0002480
19.9716	Membrane Organization		211	23	ACTB, GOLGA2, GORASP1, GOSR2, HGS, LMAN1, EXOC6, PRKAB2, RAB13, FTH1, FTL, STAM2, SCFD1, SEC16A, SEC24D, AP1S1, STX4, STX5, TJP1, BLOC1S3, CALM2, CHMP4A, CTAGE5	http://amigo.geneontology.org/amigo/term/GO:0061024
19.2969	Antigen Processing and Presentation		62	12	HLA-A, HLA-DRA, HLA-DRB1, HLA-DRB5, HLA-B, HLA-E, HLA-F, HLA-C, PSMB8, RELB, CD74, CTSS	http://amigo.geneontology.org/amigo/term/GO:0019882
19.0274	Translation		270	26	EEF1D, MRPL12, MRPL14, MRPL27, EIF1AX, EIF2S2, MRPS18A, EIF3J, GSPT2, GTF2H3, EIF4EBP1, FAU, RPL19, SRP54, RPL26, RPL29, RPLP2, RPS12, RPS19, RPS21, RSL24D1, RRBP1, SEC61B, SEC61G, TRAM1, WARS	http://amigo.geneontology.org/amigo/term/GO:0006412
17.5364	Response to Cytokine		70	12	PML, SP100, JUNB, JUND, PTGS2, FOSL1, NFKB2, STAT1, RELB, PHB, TIMP1, CORO1A	http://amigo.geneontology.org/amigo/term/GO:0034097
16.94	Nucleus Organization		21	7	GOLM1, LMNA, PDCD6IP, SYNE1, CHMP1B, CHMP4A, CHMP1A	http://amigo.geneontology.org/amigo/term/GO:0006997
16.4505	Programmed Cell Death		162	18	PLEC, H1F0, LMNA, PSMA1, PSMA5, PSMC2, PSMB10, PSMB8, PSME1, PSME2, PSMD4, NGFR, STK24, APC, TJP1, VIM, BAD, CASP7	http://amigo.geneontology.org/amigo/term/GO:0012501
16.1855	Endoplasmic Reticulum Unfolded Protein Response		104	14	AARS, GFPT1, GOSR2, LMNA, HDGF, HSPA5, SEC61B, SEC61G, SHC1, TLN1, VIMP, YIF1A, ATF6, CXCL8	http://amigo.geneontology.org/amigo/term/GO:0030968
15.6591	IRE1-mediated Unfolded Protein Response		55	10	GFPT1, GOSR2, LMNA, HDGF, HSPA5, SEC61B, SEC61G, SHC1, TLN1, YIF1A	http://amigo.geneontology.org/amigo/term/GO:0036498
14.6916	Golgi Ribbon Formation		11	5	GCC2, GOLPH3, GOLGA2, OPTN, VTI1A	http://amigo.geneontology.org/amigo/term/GO:0090161
14.4943	Movement of Cell or Subcellular Component		87	12	ACTB, PLAUR, ADGRE5, PTGS2, ANXA1, TLN1, TPM4, TPM3, VIM, ARHGEF11, CORO1A, CXCL8	http://amigo.geneontology.org/amigo/term/GO:0006928
14.1879	Protection From Natural Killer Cell Mediated Cytotoxicity		6	4	HLA-A, HLA-B, HLA-E, TAP1	http://amigo.geneontology.org/amigo/term/GO:0042270
13.9655	ER to Golgi Vesicle-mediated Transport		105	13	GOLGA2, GORASP1, GOSR1, GOSR2, LMAN1, SCFD1, SEC16A, SEC24D, STX5, VTI1A, YKT6, COG3, CTAGE5	http://amigo.geneontology.org/amigo/term/GO:0006888
13.8547	Stimulatory C-type Lectin Receptor Signaling Pathway		121	14	IL1B, ITPR1, PSMA1, PSMA5, PSMC2, PSMB10, PSMB8, PSME1, PSME2, PSMD4, NFKB2, RELB, CALM2, CREBBP	http://amigo.geneontology.org/amigo/term/GO:0002223
13.3358	Antigen Processing and Presentation of Endogenous Peptide Antigen Via MHC Class I		7	4	HLA-A, TAP1, TAP2, TAPBP	http://amigo.geneontology.org/amigo/term/GO:0019885
13.3143	NIK/NF-kappaB Signaling		67	10	PSMA1, PSMA5, PSMC2, PSMB10, PSMB8, PSME1, PSME2, PSMD4, NFKB2, RELB	http://amigo.geneontology.org/amigo/term/GO:0038061
12.9346	Tumor Necrosis Factor-mediated Signaling Pathway		145	15	PSMA1, PSMA5, PSMC2, PSMB10, PSMB8, PSME1, PSME2, PSMD4, NGFR, NFKB2, RBCK1, STAT1, RELB, TAX1BP1, CD40	http://amigo.geneontology.org/amigo/term/GO:0033209
12.8078	Golgi Organization		70	10	GOLGB1, GOLPH3L, GOLPH3, GORASP1, LMAN1, OPTN, SYNE1, TJAP1, VCPIP1, COG3	http://amigo.geneontology.org/amigo/term/GO:0007030
12.7207	Antigen Processing and Presentation of Endogenous Peptide Antigen Via MHC Class I Via ER Pathway, TAP-independent		3	3	HLA-A, HLA-B, HLA-C	http://amigo.geneontology.org/amigo/term/GO:0002486
12.5339	Cell Migration		201	18	ABL2, GOLPH3, PODXL, ENG, PPP1R9B, SORBS2, ITGB3, JAM3, NRP1, PARP9, PEAK1, SDC4, RPS6KB1, SH3KBP1, APC, CDH2, CDC42BPA, CORO1A	http://amigo.geneontology.org/amigo/term/GO:0016477
12.4724	Intracellular Protein Transport		335	25	RHOB, HGS, IFT27, NGFR, RAB23, RAB13, RAC2, STAM2, SEC24D, SEC61B, SEC61G, SIL1, AP1S1, STX4, STX5, TOMM22, VTI1A, VIMP, VPS41, ARFGAP3, ARFIP1, ARHGEF2, ARL15, CD74, COG3	http://amigo.geneontology.org/amigo/term/GO:0006886
12.3476	Regulation of Apoptotic Process		278	22	SLK, ABL2, RIPK2, PPIF, MAP2K6, PSMA1, PSMA5, PSMC2, PSMB10, PSMB8, PSME1, PSME2, PSMD4, NAE1, OXSR1, STAT1, PHB, RTN4, STK24, TAOK1, BAD, CASP4	http://amigo.geneontology.org/amigo/term/GO:0042981
12.3138	T Cell Receptor Signaling Pathway		151	15	RIPK2, HLA-DRA, HLA-DRB1, HLA-DRB5, PRKD2, PSMA1, PSMA5, PSMC2, PSMB10, PSMB8, PSME1, PSME2, PSMD4, RBCK1, VASP	http://amigo.geneontology.org/amigo/term/GO:0050852
12.2806	Protein Transport		526	34	RHOB, GORASP1, GOSR1, RND3, EIF5A2, EXOC6, HOOK3, SNX21, FAM21A, IFT27, AFTPH, MVP, MYH9, RAB23, RAB13, RABEP2, RAC2, RANBP3, PDCD6IP, PHAX, RRBP1, SCFD1, SEC16A, SEC61G, AP1S1, TMEM115, YKT6, YIF1A, YIPF5, ZMAT3, CEP41, CENPF, CHMP1B, CHMP1A	http://amigo.geneontology.org/amigo/term/GO:0015031
12.213	Nuclear-transcribed MRNA Catabolic Process, Nonsense-mediated Decay		119	13	SMG1, SMG7, GSPT2, FAU, RPL19, RPL26, RPL29, RBM8A, RPLP2, RPS12, RPS19, RPS21, CTIF	http://amigo.geneontology.org/amigo/term/GO:0000184
12.213	Leukocyte Migration		119	13	GLG1, PODXL, ICAM1, IL1B, ITGA3, ITGB3, JAM3, MYH9, FN1, SHC1, CD58, CD44, CD47	http://amigo.geneontology.org/amigo/term/GO:0050900
12.1052	Mitotic Metaphase Plate Congression		36	7	KIF14, PDCD6IP, RRS1, CDCA5, CHMP1B, CHMP4A, CHMP1A	http://amigo.geneontology.org/amigo/term/GO:0007080
12.0726	Cellular Component Disassembly Involved in Execution Phase of Apoptosis		48	8	PLEC, H1F0, LMNA, STK24, APC, TJP1, VIM, CASP7	http://amigo.geneontology.org/amigo/term/GO:0006921
11.8101	Post-translational Protein Modification		366	26	RHBDD1, SMC5, GFPT1, GFPT2, GOLGA2, GORASP1, GOSR2, PLAUR, PML, PMM2, EIF5A2, LMAN1, SP100, NSMCE2, NUPL2, PGM3, SENP1, SCFD1, SEC16A, SEC24D, SUMO3, SUMO1, STX5, XRCC4, ATG5, CTAGE5	http://amigo.geneontology.org/amigo/term/GO:0043687
11.7579	SRP-dependent Cotranslational Protein Targeting to Membrane		107	12	FAU, RPL19, SRP54, RPL26, RPL29, RPLP2, RPS12, RPS19, RPS21, SEC61B, SEC61G, TRAM1	http://amigo.geneontology.org/amigo/term/GO:0006614
11.7174	Retrograde Transport, Endosome to Golgi		63	9	GCC2, GOSR1, GOSR2, FAM21A, AP1S1, STX5, TRIM27, VTI1A, YKT6	http://amigo.geneontology.org/amigo/term/GO:0042147
11.6834	Regulation of Cell Adhesion		50	8	ABL2, PML, LMO7, PPP1R12A, ENG, ICAM1, KIF14, CXCL8	http://amigo.geneontology.org/amigo/term/GO:0030155
11.4957	Regulation of Cellular Amino Acid Metabolic Process		51	8	PSMA1, PSMA5, PSMC2, PSMB10, PSMB8, PSME1, PSME2, PSMD4	http://amigo.geneontology.org/amigo/term/GO:0006521
11.4185	Translational Initiation		143	14	EIF1AX, EIF2S2, EIF3J, EIF4EBP1, EIF6, FAU, RPL19, RPL26, RPL29, RPLP2, RPS12, RPS19, RPS21, DENR	http://amigo.geneontology.org/amigo/term/GO:0006413

## Sheet: MeDeBO down Gene Set
GeneAnalytics - Analysis Report			Prepared for: Juan Luis Fernandez Martinez (jlfm@uniovi.es)
			Date: 12/2/2016
Copyright © LifeMap Sciences, Inc.
	MeDeBO exposed to NK cells Vs Nil (proteins DOWN)
Species	Human
Identified genes (790)
Symbol	Full Name	Aliases	GeneCards URL
AAAS	Aladin WD Repeat Nucleoporin	AAA, aladin, Allgrove, triple-A, adracalin, AAASb, GL003, ADRACALA	http://www.genecards.org/cgi-bin/carddisp.pl?gene=AAAS
AAGAB	Alpha- And Gamma-Adaptin Binding Protein	KPPP1, PPKP1, PPKP1A, p34	http://www.genecards.org/cgi-bin/carddisp.pl?gene=AAGAB
AAR2	AAR2 Splicing Factor Homolog	CGI-23, C20orf4	http://www.genecards.org/cgi-bin/carddisp.pl?gene=AAR2
AASS	Aminoadipate-Semialdehyde Synthase	LKRSDH, LORSDH, LKR/SDH	http://www.genecards.org/cgi-bin/carddisp.pl?gene=AASS
ABCB6	ATP Binding Cassette Subfamily B Member 6 (Langereis Blood Group)	ABC, ABC14, DUH3, LAN, MCOPCB7, PSHK2, umat, MTABC3, PRP	http://www.genecards.org/cgi-bin/carddisp.pl?gene=ABCB6
ABCB7	ATP Binding Cassette Subfamily B Member 7	ASAT, Atm1p, EST140535, ABC7	http://www.genecards.org/cgi-bin/carddisp.pl?gene=ABCB7
ABCC1	ATP Binding Cassette Subfamily C Member 1	ABC29, ABCC, GS-X, MRP, MRP1	http://www.genecards.org/cgi-bin/carddisp.pl?gene=ABCC1
ABHD12	Abhydrolase Domain Containing 12	ABHD12A, BEM46L2, PHARC, dJ965G21.2, C20orf22	http://www.genecards.org/cgi-bin/carddisp.pl?gene=ABHD12
ABRACL	ABRA C-Terminal Like	Costars, HSPC280, PRO2013, C6orf115	http://www.genecards.org/cgi-bin/carddisp.pl?gene=ABRACL
ACACA	Acetyl-CoA Carboxylase Alpha	ACACAD, ACC, ACAC, ACC-alpha, ACC1, ACCA	http://www.genecards.org/cgi-bin/carddisp.pl?gene=ACACA
ACAD10	Acyl-CoA Dehydrogenase Family Member 10	ACAD-10	http://www.genecards.org/cgi-bin/carddisp.pl?gene=ACAD10
ACAT2	Acetyl-CoA Acetyltransferase 2	ACTL	http://www.genecards.org/cgi-bin/carddisp.pl?gene=ACAT2
ACLY	ATP Citrate Lyase	ATPCL, CLATP, ACL	http://www.genecards.org/cgi-bin/carddisp.pl?gene=ACLY
ACO1	Aconitase 1	cytoplasmic, ACONS, HEL60, IREBP, IREBP1, IREB1, Aconitase, IRP1	http://www.genecards.org/cgi-bin/carddisp.pl?gene=ACO1
ACOX1	Acyl-CoA Oxidase 1, Palmitoyl	PALMCOX, ACOX, AOX, SCOX	http://www.genecards.org/cgi-bin/carddisp.pl?gene=ACOX1
ACP5	Acid Phosphatase 5, Tartrate Resistant	HPAP, TRACP5a, TRACP5b, TRAP, TrATPase, TR-AP	http://www.genecards.org/cgi-bin/carddisp.pl?gene=ACP5
ACP6	Acid Phosphatase 6, Lysophosphatidic	ACPL1, LPAP, PACPL1	http://www.genecards.org/cgi-bin/carddisp.pl?gene=ACP6
ACSL1	Acyl-CoA Synthetase Long-Chain Family Member 1	FACL2, ACS1, FACL1, LACS, LACS1, LACS2	http://www.genecards.org/cgi-bin/carddisp.pl?gene=ACSL1
ACSL3	Acyl-CoA Synthetase Long-Chain Family Member 3	PRO2194, FACL3, ACS3, LACS3	http://www.genecards.org/cgi-bin/carddisp.pl?gene=ACSL3
ACSS1	Acyl-CoA Synthetase Short-Chain Family Member 1	ACECS1, AceCS2L, ACAS2L, AceCS2, KIAA1846	http://www.genecards.org/cgi-bin/carddisp.pl?gene=ACSS1
ACSS2	Acyl-CoA Synthetase Short-Chain Family Member 2	ACS, ACECS, ACSA, dJ1161H23.1, ACAS2	http://www.genecards.org/cgi-bin/carddisp.pl?gene=ACSS2
ADD1	Adducin 1	alpha-adducin, ADDA	http://www.genecards.org/cgi-bin/carddisp.pl?gene=ADD1
ADGRG1	Adhesion G Protein-Coupled Receptor G1	BFPP, BPPR, GPR56, TM7LN4, TM7XN1	http://www.genecards.org/cgi-bin/carddisp.pl?gene=ADGRG1
ADI1	Acireductone Dioxygenase 1	APL1, HMFT1638, Ni-ARD, SIPL, mtnD, ARD, Fe-ARD, MTCBP1, MTCBP-1, Sip-L	http://www.genecards.org/cgi-bin/carddisp.pl?gene=ADI1
ADRBK1	Adrenergic, Beta, Receptor Kinase 1	BETA-ARK1, beta-ARK-1, BARK1, GRK2, BARK	http://www.genecards.org/cgi-bin/carddisp.pl?gene=ADRBK1
ADSL	Adenylosuccinate Lyase	ASASE, adenylosuccinase, AMPS, ASL	http://www.genecards.org/cgi-bin/carddisp.pl?gene=ADSL
AEBP1	AE Binding Protein 1	ACLP	http://www.genecards.org/cgi-bin/carddisp.pl?gene=AEBP1
AGAP1	ArfGAP With GTPase Domain, Ankyrin Repeat And PH Domain 1	cnt-g2, CENTG2, AGAP-1, GGAP1, Centaurin-gamma-2, KIAA1099	http://www.genecards.org/cgi-bin/carddisp.pl?gene=AGAP1
AGAP3	ArfGAP With GTPase Domain, Ankyrin Repeat And PH Domain 3	centaurin-gamma-3, cnt-g3, CENTG3, AGAP-3, CRAG, MRIP-1	http://www.genecards.org/cgi-bin/carddisp.pl?gene=AGAP3
AGL	Amylo-Alpha-1, 6-Glucosidase, 4-Alpha-Glucanotransferase	GDE	http://www.genecards.org/cgi-bin/carddisp.pl?gene=AGL
AHCY	Adenosylhomocysteinase	adoHcyase, SAHH, adenosylhomocysteinase	http://www.genecards.org/cgi-bin/carddisp.pl?gene=AHCY
AHCYL1	Adenosylhomocysteinase Like 1	PPP1R78, PRO0233, DCAL, IRBIT, XPVKONA	http://www.genecards.org/cgi-bin/carddisp.pl?gene=AHCYL1
AHCYL2	Adenosylhomocysteinase Like 2	ADOHCYASE3, long-IRBIT, IRBIT2, KIAA0828	http://www.genecards.org/cgi-bin/carddisp.pl?gene=AHCYL2
AHSA1	AHA1, Activator Of Heat Shock 90kDa Protein ATPase Homolog 1 (Yeast)	hAha1, C14orf3, AHA1, p38	http://www.genecards.org/cgi-bin/carddisp.pl?gene=AHSA1
AK3	Adenylate Kinase 3	AKL3L1, FIX, AK3L1, AK6, AKL3L	http://www.genecards.org/cgi-bin/carddisp.pl?gene=AK3
AKAP17A	A-Kinase Anchoring Protein 17A	CCDC133, XE7Y, CXYorf3, SFRS17A, 721P, AKAP-17A, DXYS155E, PRKA17A, XE7	http://www.genecards.org/cgi-bin/carddisp.pl?gene=AKAP17A
AKR1A1	Aldo-Keto Reductase Family 1, Member A1 (Aldehyde Reductase)	ARM, DD3, HEL-S-165mP, HEL-S-6, ALDR1, ALR	http://www.genecards.org/cgi-bin/carddisp.pl?gene=AKR1A1
AKT2	V-Akt Murine Thymoma Viral Oncogene Homolog 2	HIHGHH, PKBB, PKBBETA, PRKBB, RAC-BETA, RAC-PK-beta	http://www.genecards.org/cgi-bin/carddisp.pl?gene=AKT2
ALDH1B1	Aldehyde Dehydrogenase 1 Family Member B1	ALDH5, ALDHX	http://www.genecards.org/cgi-bin/carddisp.pl?gene=ALDH1B1
ALDH6A1	Aldehyde Dehydrogenase 6 Family Member A1	MMSADHA, MMSDH	http://www.genecards.org/cgi-bin/carddisp.pl?gene=ALDH6A1
ALG11	ALG11, Alpha-1,2-Mannosyltransferase	CDG1P, GT8	http://www.genecards.org/cgi-bin/carddisp.pl?gene=ALG11
AMDHD2	Amidohydrolase Domain Containing 2	CGI-14	http://www.genecards.org/cgi-bin/carddisp.pl?gene=AMDHD2
ANAPC5	Anaphase Promoting Complex Subunit 5	APC5	http://www.genecards.org/cgi-bin/carddisp.pl?gene=ANAPC5
ANKRD27	Ankyrin Repeat Domain 27	PP12899, VARP	http://www.genecards.org/cgi-bin/carddisp.pl?gene=ANKRD27
ANXA5	Annexin A5	CBP-I, HEL-S-7, RPRGL3, annexin-5, ANX5, ENX2, PP4, VAC-alpha, PAP-I	http://www.genecards.org/cgi-bin/carddisp.pl?gene=ANXA5
ANXA6	Annexin A6	CBP68, annexin-6, calelectrin, calphobindin-II, chromobindin-20, ANX6, CPB-II, p68, p70	http://www.genecards.org/cgi-bin/carddisp.pl?gene=ANXA6
AP1G1	Adaptor Related Protein Complex 1 Gamma 1 Subunit	gamma1-adaptin, ADTG, CLAPG1	http://www.genecards.org/cgi-bin/carddisp.pl?gene=AP1G1
AP2B1	Adaptor Related Protein Complex 2 Beta 1 Subunit	AP2-BETA, beta-adaptin, beta-2-adaptin, ADTB2, CLAPB1, AP105B	http://www.genecards.org/cgi-bin/carddisp.pl?gene=AP2B1
AP4B1	Adaptor Related Protein Complex 4 Beta 1 Subunit	BETA-4, CPSQ5, beta4-adaptin, SPG47	http://www.genecards.org/cgi-bin/carddisp.pl?gene=AP4B1
APBB1	Amyloid Beta Precursor Protein Binding Family B Member 1	RIR, FE65, MGC:9072	http://www.genecards.org/cgi-bin/carddisp.pl?gene=APBB1
APOBEC3C	Apolipoprotein B MRNA Editing Enzyme Catalytic Subunit 3C	Arp5, APOBEC1L, ARDC2, ARDC4, bK150C2.3, A3C, PBI, APOBEC1-like	http://www.genecards.org/cgi-bin/carddisp.pl?gene=APOBEC3C
APOE	Apolipoprotein E	APO-E, LDLCQ5, LPG, AD2	http://www.genecards.org/cgi-bin/carddisp.pl?gene=APOE
APPL2	Adaptor Protein, Phosphotyrosine Interacting With PH Domain And Leucine Zipper 2	DIP13B, Dip13-beta	http://www.genecards.org/cgi-bin/carddisp.pl?gene=APPL2
ARAP1	ArfGAP With RhoGAP Domain, Ankyrin Repeat And PH Domain 1	centaurin-delta-2, cnt-d2, CENTD2, KIAA0782	http://www.genecards.org/cgi-bin/carddisp.pl?gene=ARAP1
ARF5	ADP Ribosylation Factor 5		http://www.genecards.org/cgi-bin/carddisp.pl?gene=ARF5
ARHGAP1	Rho GTPase Activating Protein 1	RHOGAP, p50rhoGAP, CDC42GAP, RHOGAP1, p50-RhoGAP	http://www.genecards.org/cgi-bin/carddisp.pl?gene=ARHGAP1
ARHGAP17	Rho GTPase Activating Protein 17	MST066, MST110, MSTP038, MSTP066, MSTP110, NADRIN, PP367, PP4534, WBP15, RICH-1, RICH1	http://www.genecards.org/cgi-bin/carddisp.pl?gene=ARHGAP17
ARHGEF10	Rho Guanine Nucleotide Exchange Factor 10	GEF10, SNCV, KIAA0294	http://www.genecards.org/cgi-bin/carddisp.pl?gene=ARHGEF10
ARL2	ADP Ribosylation Factor Like GTPase 2	ARFL2	http://www.genecards.org/cgi-bin/carddisp.pl?gene=ARL2
ARL6IP5	ADP Ribosylation Factor Like GTPase 6 Interacting Protein 5	HSPC127, Yip6b, addicsin, aip-5, hp22, jmx, DERP11, GTRAP3-18, JM5, JWA, PRAF3, PRA2	http://www.genecards.org/cgi-bin/carddisp.pl?gene=ARL6IP5
ARMT1	Acidic Residue Methyltransferase 1	C6orf211	http://www.genecards.org/cgi-bin/carddisp.pl?gene=ARMT1
ARSB	Arylsulfatase B	ASB, MPS6, G4S, N-acetylgalactosamine-4-sulfatase	http://www.genecards.org/cgi-bin/carddisp.pl?gene=ARSB
ASAH1	N-Acylsphingosine Amidohydrolase (Acid Ceramidase) 1	PHP, SMAPME, ASAH, AC, ACDase, PHP32	http://www.genecards.org/cgi-bin/carddisp.pl?gene=ASAH1
ASB9	Ankyrin Repeat And SOCS Box Containing 9	ASB-9	http://www.genecards.org/cgi-bin/carddisp.pl?gene=ASB9
ATG2B	Autophagy Related 2B	C14orf103	http://www.genecards.org/cgi-bin/carddisp.pl?gene=ATG2B
ATG4B	Autophagy Related 4B Cysteine Peptidase	autophagin-1, APG4B, AUTL1, hAPG4B, KIAA0943	http://www.genecards.org/cgi-bin/carddisp.pl?gene=ATG4B
ATM	ATM Serine/Threonine Kinase	AT1, TEL1, ATE, TELO1, ATA, ATC, ATD, ATDC	http://www.genecards.org/cgi-bin/carddisp.pl?gene=ATM
ATP11A	ATPase Phospholipid Transporting 11A	ATPIH, ATPIS, KIAA1021	http://www.genecards.org/cgi-bin/carddisp.pl?gene=ATP11A
ATP5B	ATP Synthase, H+ Transporting, Mitochondrial F1 Complex, Beta Polypeptide	HEL-S-271, ATPSB, ATPMB	http://www.genecards.org/cgi-bin/carddisp.pl?gene=ATP5B
ATP6AP2	ATPase H+ Transporting Accessory Protein 2	M8-9, HT028, ATP6IP2, ATP6M8-9, MRXE, MRXSH, MSTP009, PRR, RENR, XMRE, XPDS, APT6M8-9, ELDF10, N14F, CAPER	http://www.genecards.org/cgi-bin/carddisp.pl?gene=ATP6AP2
ATP6V0A2	ATPase H+ Transporting V0 Subunit A2	Stv1, Vph1, A2, A2V-ATPase, ARCL, ARCL2A, ATP6A2, ATP6N1D, J6B7, RTF, TJ6M, TJ6S, WSS, TJ6	http://www.genecards.org/cgi-bin/carddisp.pl?gene=ATP6V0A2
ATP6V0D2	ATPase H+ Transporting V0 Subunit D2	VMA6, ATP6D2	http://www.genecards.org/cgi-bin/carddisp.pl?gene=ATP6V0D2
ATPAF1	ATP Synthase Mitochondrial F1 Complex Assembly Factor 1	ATP11p, ATP11	http://www.genecards.org/cgi-bin/carddisp.pl?gene=ATPAF1
ATPAF2	ATP Synthase Mitochondrial F1 Complex Assembly Factor 2	LP3663, MC5DN1, ATP12, ATP12p	http://www.genecards.org/cgi-bin/carddisp.pl?gene=ATPAF2
ATR	ATR Serine/Threonine Kinase	FCTCS, MEC1, SCKL, SCKL1, FRP1	http://www.genecards.org/cgi-bin/carddisp.pl?gene=ATR
AVL9	AVL9 Cell Migration Associated	KIAA0241	http://www.genecards.org/cgi-bin/carddisp.pl?gene=AVL9
B4GAT1	Beta-1,4-Glucuronyltransferase 1	B3GNT1, B3GN-T1, BETA3GNTI, MDDGA13, i-beta-1,3-N-acetylglucosaminyltransferase, iGAT, iGNT, B3GNT6	http://www.genecards.org/cgi-bin/carddisp.pl?gene=B4GAT1
BBX	Bobby Sox Homolog (Drosophila)	ARTC1, HSPC339, MDS001, HBP2	http://www.genecards.org/cgi-bin/carddisp.pl?gene=BBX
BCAT2	Branched Chain Amino Acid Transaminase 2	PP18, BCAM, BCT2, BCATM, BCAT(m), ECA40	http://www.genecards.org/cgi-bin/carddisp.pl?gene=BCAT2
BDH1	3-Hydroxybutyrate Dehydrogenase, Type 1	BDH, SDR9C1	http://www.genecards.org/cgi-bin/carddisp.pl?gene=BDH1
BET1L	Bet1 Golgi Vesicular Membrane Trafficking Protein Like	BET1L1, GOLIM3, HSPC197, GOS-15, GS15	http://www.genecards.org/cgi-bin/carddisp.pl?gene=BET1L
BLMH	Bleomycin Hydrolase	BMH, BH	http://www.genecards.org/cgi-bin/carddisp.pl?gene=BLMH
BMS1	BMS1, Ribosome Biogenesis Factor	ACC, BMS1L, KIAA0187	http://www.genecards.org/cgi-bin/carddisp.pl?gene=BMS1
BPGM	Bisphosphoglycerate Mutase	DPGM	http://www.genecards.org/cgi-bin/carddisp.pl?gene=BPGM
BPHL	Biphenyl Hydrolase-Like (Serine Hydrolase)	BPH-RP, VACVASE, valacyclovirase, MCNAA	http://www.genecards.org/cgi-bin/carddisp.pl?gene=BPHL
BRAT1	BRCA1 Associated ATM Activator 1	RMFSL, BAAT1, C7orf27	http://www.genecards.org/cgi-bin/carddisp.pl?gene=BRAT1
BRD1	Bromodomain Containing 1	BR140-like, BRPF1, BRL, BRPF2	http://www.genecards.org/cgi-bin/carddisp.pl?gene=BRD1
BRPF3	Bromodomain And PHD Finger Containing 3	KIAA1286	http://www.genecards.org/cgi-bin/carddisp.pl?gene=BRPF3
BZW2	Basic Leucine Zipper And W2 Domains 2	HSPC028, MST017, MSTP017	http://www.genecards.org/cgi-bin/carddisp.pl?gene=BZW2
C11orf54	Chromosome 11 Open Reading Frame 54	PTD012, PTOD012	http://www.genecards.org/cgi-bin/carddisp.pl?gene=C11orf54
C15orf38-AP3S2	C15orf38-AP3S2 Readthrough		http://www.genecards.org/cgi-bin/carddisp.pl?gene=C15orf38-AP3S2
C16orf13	Chromosome 16 Open Reading Frame 13	JFP2	http://www.genecards.org/cgi-bin/carddisp.pl?gene=C16orf13
C17orf75	Chromosome 17 Open Reading Frame 75	NJMU-R1, SRI2	http://www.genecards.org/cgi-bin/carddisp.pl?gene=C17orf75
C1orf27	Chromosome 1 Open Reading Frame 27	ODR4, odr-4, TTG1, TTG1A, hODR-4	http://www.genecards.org/cgi-bin/carddisp.pl?gene=C1orf27
C2CD5	C2 Calcium-Dependent Domain Containing 5	KIAA0528, CDP138	http://www.genecards.org/cgi-bin/carddisp.pl?gene=C2CD5
C2orf49	Chromosome 2 Open Reading Frame 49	ashwin, asw	http://www.genecards.org/cgi-bin/carddisp.pl?gene=C2orf49
C5orf51	Chromosome 5 Open Reading Frame 51		http://www.genecards.org/cgi-bin/carddisp.pl?gene=C5orf51
CAD	Carbamoyl-Phosphate Synthetase 2, Aspartate Transcarbamylase, And Dihydroorotase	CDG1Z	http://www.genecards.org/cgi-bin/carddisp.pl?gene=CAD
CAMK4	Calcium/Calmodulin-Dependent Protein Kinase IV	CAMK, CaMK-GR, CAMKIV	http://www.genecards.org/cgi-bin/carddisp.pl?gene=CAMK4
CAPG	Capping Actin Protein, Gelsolin Like	HEL-S-66, AFCP, MCP	http://www.genecards.org/cgi-bin/carddisp.pl?gene=CAPG
CARD16	Caspase Recruitment Domain Family Member 16	PSEUDO-ICE, COP, COP1	http://www.genecards.org/cgi-bin/carddisp.pl?gene=CARD16
CARM1	Coactivator Associated Arginine Methyltransferase 1	PRMT4	http://www.genecards.org/cgi-bin/carddisp.pl?gene=CARM1
CASP9	Caspase 9	APAF3, PPP1R56, APAF-3, ICE-LAP6, MCH6, CASP-9	http://www.genecards.org/cgi-bin/carddisp.pl?gene=CASP9
CAT	Catalase	catalase	http://www.genecards.org/cgi-bin/carddisp.pl?gene=CAT
CCDC134	Coiled-Coil Domain Containing 134		http://www.genecards.org/cgi-bin/carddisp.pl?gene=CCDC134
CCDC43	Coiled-Coil Domain Containing 43		http://www.genecards.org/cgi-bin/carddisp.pl?gene=CCDC43
CCM2L	CCM2 Like Scaffolding Protein	dJ310O13.5, C20orf160, CCM2-like	http://www.genecards.org/cgi-bin/carddisp.pl?gene=CCM2L
CD109	CD109 Molecule	CPAMD7, p180, r150	http://www.genecards.org/cgi-bin/carddisp.pl?gene=CD109
CD63	CD63 Molecule	ME491, granulophysin, tetraspanin-30, tspan-30, MLA1, LAMP-3, OMA81H, TSPAN30	http://www.genecards.org/cgi-bin/carddisp.pl?gene=CD63
CDH1	Cadherin 1	E-Cadherin, Arc-1, CD324, ECAD, LCAM, uvomorulin, UVO, CDHE	http://www.genecards.org/cgi-bin/carddisp.pl?gene=CDH1
CDK2	Cyclin-Dependent Kinase 2	p33(CDK2), CDKN2	http://www.genecards.org/cgi-bin/carddisp.pl?gene=CDK2
CDK4	Cyclin-Dependent Kinase 4	CMM3, PSK-J3	http://www.genecards.org/cgi-bin/carddisp.pl?gene=CDK4
CECR5	Cat Eye Syndrome Chromosome Region, Candidate 5		http://www.genecards.org/cgi-bin/carddisp.pl?gene=CECR5
CENPC	Centromere Protein C	MIF2, hcp-4, CENPC1, CENP-C, ICEN7	http://www.genecards.org/cgi-bin/carddisp.pl?gene=CENPC
CFAP20	Cilia And Flagella Associated Protein 20	EVORF, GTL3, fSAP23, C16orf80, BUG22	http://www.genecards.org/cgi-bin/carddisp.pl?gene=CFAP20
CHCHD5	Coiled-Coil-Helix-Coiled-Coil-Helix Domain Containing 5	MIC14, C2orf9	http://www.genecards.org/cgi-bin/carddisp.pl?gene=CHCHD5
CHID1	Chitinase Domain Containing 1	GL008, SICLP, SI-CLP	http://www.genecards.org/cgi-bin/carddisp.pl?gene=CHID1
CHKB	Choline Kinase Beta	CK, EK, MDCMC, CHKL, CHETK, CKB, CKEKB, EKB	http://www.genecards.org/cgi-bin/carddisp.pl?gene=CHKB
CHST11	Carbohydrate (Chondroitin 4) Sulfotransferase 11	C4ST, HSA269537, C4S-1, C4ST-1, C4ST1	http://www.genecards.org/cgi-bin/carddisp.pl?gene=CHST11
CISD1	CDGSH Iron Sulfur Domain 1	MDS029, mitoNEET, C10orf70, ZCD1	http://www.genecards.org/cgi-bin/carddisp.pl?gene=CISD1
CIZ1	CDKN1A Interacting Zinc Finger Protein 1	LSFR1, NP94, ZNF356	http://www.genecards.org/cgi-bin/carddisp.pl?gene=CIZ1
CKS1B	CDC28 Protein Kinase Regulatory Subunit 1B	ckshs1, CKS-1, CKS1, PNAS-143, PNAS-16, PNAS-18	http://www.genecards.org/cgi-bin/carddisp.pl?gene=CKS1B
CLCN7	Chloride Voltage-Gated Channel 7	CLC-7, CLC7, OPTA2, OPTB4, PPP1R63	http://www.genecards.org/cgi-bin/carddisp.pl?gene=CLCN7
CLPTM1L	CLPTM1-Like	CLPTM1-like, CRR9, CRR9p	http://www.genecards.org/cgi-bin/carddisp.pl?gene=CLPTM1L
CLUH	Clustered Mitochondria (CluA/CLU1) Homolog	CLU1, KIAA0664	http://www.genecards.org/cgi-bin/carddisp.pl?gene=CLUH
CLYBL	Citrate Lyase Beta Like	CLB	http://www.genecards.org/cgi-bin/carddisp.pl?gene=CLYBL
CMTR1	Cap Methyltransferase 1	KIAA0082, FTSJD2, hMTr1, ISG95, MTr1	http://www.genecards.org/cgi-bin/carddisp.pl?gene=CMTR1
COG8	Component Of Oligomeric Golgi Complex 8	CDG2H, DOR1	http://www.genecards.org/cgi-bin/carddisp.pl?gene=COG8
COMMD3-BMI1	COMMD3-BMI1 Readthrough		http://www.genecards.org/cgi-bin/carddisp.pl?gene=COMMD3-BMI1
COMMD4	COMM Domain Containing 4		http://www.genecards.org/cgi-bin/carddisp.pl?gene=COMMD4
COMMD9	COMM Domain Containing 9	HSPC166	http://www.genecards.org/cgi-bin/carddisp.pl?gene=COMMD9
COMTD1	Catechol-O-Methyltransferase Domain Containing 1		http://www.genecards.org/cgi-bin/carddisp.pl?gene=COMTD1
CORO1B	Coronin 1B	CORONIN-2	http://www.genecards.org/cgi-bin/carddisp.pl?gene=CORO1B
CORO7	Coronin 7	0610011B16Rik, CRN7, POD1	http://www.genecards.org/cgi-bin/carddisp.pl?gene=CORO7
COX15	COX15 Cytochrome C Oxidase Assembly Homolog	CEMCOX2	http://www.genecards.org/cgi-bin/carddisp.pl?gene=COX15
COX4I1	Cytochrome C Oxidase Subunit 4I1	COX4-1, COXIV, COXIV-1, COX4	http://www.genecards.org/cgi-bin/carddisp.pl?gene=COX4I1
COX6B1	Cytochrome C Oxidase Subunit 6B1	COXG, COXVIb1, COX6B	http://www.genecards.org/cgi-bin/carddisp.pl?gene=COX6B1
COX7A2L	Cytochrome C Oxidase Subunit 7A2 Like	EB1, SIG81, COX7AR, COX7RP	http://www.genecards.org/cgi-bin/carddisp.pl?gene=COX7A2L
CPEB4	Cytoplasmic Polyadenylation Element Binding Protein 4	CPE-BP4, hCPEB-4, KIAA1673	http://www.genecards.org/cgi-bin/carddisp.pl?gene=CPEB4
CPNE3	Copine 3	CPN3, KIAA0636, PRO1071	http://www.genecards.org/cgi-bin/carddisp.pl?gene=CPNE3
CPSF3	Cleavage And Polyadenylation Specific Factor 3	CPSF-73, CPSF73	http://www.genecards.org/cgi-bin/carddisp.pl?gene=CPSF3
CPTP	Ceramide-1-Phosphate Transfer Protein	GLTPD1	http://www.genecards.org/cgi-bin/carddisp.pl?gene=CPTP
CRADD	CASP2 And RIPK1 Domain Containing Adaptor With Death Domain	MRT34, RAIDD	http://www.genecards.org/cgi-bin/carddisp.pl?gene=CRADD
CRCP	CGRP Receptor Component	RCP, RCP9, CGRP-RCP, CGRPRCP, HsC17	http://www.genecards.org/cgi-bin/carddisp.pl?gene=CRCP
CRIPT	CXXC Repeat Containing Interactor Of PDZ3 Domain	HSPC139, SSMDF	http://www.genecards.org/cgi-bin/carddisp.pl?gene=CRIPT
CRTAP	Cartilage Associated Protein	LEPREL3, OI7, P3H5, CASP	http://www.genecards.org/cgi-bin/carddisp.pl?gene=CRTAP
CRYAB	Crystallin Alpha B	CMD1II, CTPP2, CTRCT16, HEL-S-101, MFM2, CRYA2, HSPB5, Alpha(B)-crystallin	http://www.genecards.org/cgi-bin/carddisp.pl?gene=CRYAB
CST3	Cystatin C	ARMD11, HEL-S-2, cystatin-3, gamma-trace, post-gamma-globulin	http://www.genecards.org/cgi-bin/carddisp.pl?gene=CST3
CSTF1	Cleavage Stimulation Factor Subunit 1	CstFp50, CstF-50	http://www.genecards.org/cgi-bin/carddisp.pl?gene=CSTF1
CTBP2	C-Terminal Binding Protein 2	ribeye, CtBP2	http://www.genecards.org/cgi-bin/carddisp.pl?gene=CTBP2
CTHRC1	Collagen Triple Helix Repeat Containing 1		http://www.genecards.org/cgi-bin/carddisp.pl?gene=CTHRC1
CTNNB1	Catenin Beta 1	MRD19, armadillo, CTNNB, Beta-catenin	http://www.genecards.org/cgi-bin/carddisp.pl?gene=CTNNB1
CTNND1	Catenin Delta 1	p120(CTN), p120(CAS), P120CTN, P120CAS, p120, CAS, CTNND, KIAA0384	http://www.genecards.org/cgi-bin/carddisp.pl?gene=CTNND1
CTSA	Cathepsin A	deamidase, carboxypeptidase-L, GLB2, NGBE, GSL, PPGB, PPCA	http://www.genecards.org/cgi-bin/carddisp.pl?gene=CTSA
CTSB	Cathepsin B	APPS, CPSB	http://www.genecards.org/cgi-bin/carddisp.pl?gene=CTSB
CTSH	Cathepsin H	ACC4, ACC5, aleurain, ACC-4, ACC-5, CPSB	http://www.genecards.org/cgi-bin/carddisp.pl?gene=CTSH
CUL4A	Cullin 4A	CUL-4A	http://www.genecards.org/cgi-bin/carddisp.pl?gene=CUL4A
CXADR	Coxsackie Virus And Adenovirus Receptor	CAR, CAR4/6, HCAR, HCVADR	http://www.genecards.org/cgi-bin/carddisp.pl?gene=CXADR
CYCS	Cytochrome C, Somatic	HCS, THC4, CYC	http://www.genecards.org/cgi-bin/carddisp.pl?gene=CYCS
CYP51A1	Cytochrome P450 Family 51 Subfamily A Member 1	CP51, CYPL1, P450-14DM, P450L1, CYP51, CYPLI, LDM	http://www.genecards.org/cgi-bin/carddisp.pl?gene=CYP51A1
DARS2	Aspartyl-TRNA Synthetase 2, Mitochondrial	mitochondrial, LBSL, MT-ASPRS, aspRS	http://www.genecards.org/cgi-bin/carddisp.pl?gene=DARS2
DBI	Diazepam Binding Inhibitor (GABA Receptor Modulator, Acyl-CoA Binding Protein)	ACBP, endozepine, ACBD1, CCK-RP, EP	http://www.genecards.org/cgi-bin/carddisp.pl?gene=DBI
DBT	Dihydrolipoamide Branched Chain Transacylase E2	mitochondrial, E2, E2B, BCATE2, BCKAD-E2, BCKADE2, BCOADC-E2	http://www.genecards.org/cgi-bin/carddisp.pl?gene=DBT
DCK	Deoxycytidine Kinase	dCK	http://www.genecards.org/cgi-bin/carddisp.pl?gene=DCK
DCLK1	Doublecortin Like Kinase 1	CL1, CLICK1, DCLK, DCAMKL1, DCDC3A, KIAA0369	http://www.genecards.org/cgi-bin/carddisp.pl?gene=DCLK1
DCP1B	Decapping MRNA 1B	DCP1	http://www.genecards.org/cgi-bin/carddisp.pl?gene=DCP1B
DCT	Dopachrome Tautomerase	TYRP2, DT, TRP-2, TRP2	http://www.genecards.org/cgi-bin/carddisp.pl?gene=DCT
DCTPP1	DCTP Pyrophosphatase 1	CDA03, RS21C6, XTP3TPA	http://www.genecards.org/cgi-bin/carddisp.pl?gene=DCTPP1
DCUN1D5	Defective In Cullin Neddylation 1 Domain Containing 5	SCCRO5	http://www.genecards.org/cgi-bin/carddisp.pl?gene=DCUN1D5
DCXR	Dicarbonyl/L-Xylulose Reductase	DCR, HCR2, HCRII, KIDCR, P34H, PNTSU, SDR20C1, XR	http://www.genecards.org/cgi-bin/carddisp.pl?gene=DCXR
DDB1	Damage Specific DNA Binding Protein 1	DDBA, UV-DDB1, XPCE, XPE, XAP-1, XAP1, XPE-BF	http://www.genecards.org/cgi-bin/carddisp.pl?gene=DDB1
DDOST	Dolichyl-Diphosphooligosaccharide--Protein Glycosyltransferase Non-Catalytic Subunit	AGER1, CDG1R, OKSWcl45, OST, WBP1, OST48, KIAA0115	http://www.genecards.org/cgi-bin/carddisp.pl?gene=DDOST
DDX28	DEAD-Box Helicase 28	MDDX28	http://www.genecards.org/cgi-bin/carddisp.pl?gene=DDX28
DDX5	DEAD-Box Helicase 5	p68, HUMP68, G17P1, HLR1, HELR	http://www.genecards.org/cgi-bin/carddisp.pl?gene=DDX5
DDX50	DEAD-Box Helicase 50	GU2, GUB, RH-II/GuB, gu-beta, mcdrh	http://www.genecards.org/cgi-bin/carddisp.pl?gene=DDX50
DERA	Deoxyribose-Phosphate Aldolase	CGI-26, DEOC, deoxyriboaldolase, phosphodeoxyriboaldolase	http://www.genecards.org/cgi-bin/carddisp.pl?gene=DERA
DHCR7	7-Dehydrocholesterol Reductase	SLOS, D7SR	http://www.genecards.org/cgi-bin/carddisp.pl?gene=DHCR7
DHFR	Dihydrofolate Reductase	DHFRP1, DYR	http://www.genecards.org/cgi-bin/carddisp.pl?gene=DHFR
DHTKD1	Dehydrogenase E1 And Transketolase Domain Containing 1	KIAA1630, CMT2Q, AMOXAD	http://www.genecards.org/cgi-bin/carddisp.pl?gene=DHTKD1
DHX37	DEAH-Box Helicase 37	DDX37, KIAA1517	http://www.genecards.org/cgi-bin/carddisp.pl?gene=DHX37
DHX8	DEAH-Box Helicase 8	PRP22, PRPF22, DDX8, HRH1	http://www.genecards.org/cgi-bin/carddisp.pl?gene=DHX8
DLAT	Dihydrolipoamide S-Acetyltransferase	DLTA, PBC, PDC-E2, PDCE2	http://www.genecards.org/cgi-bin/carddisp.pl?gene=DLAT
DLGAP5	Discs Large Homolog Associated Protein 5	DLG7, DAP-5, HURP, KIAA0008	http://www.genecards.org/cgi-bin/carddisp.pl?gene=DLGAP5
DMXL1	Dmx Like 1	XL1	http://www.genecards.org/cgi-bin/carddisp.pl?gene=DMXL1
DMXL2	Dmx Like 2	PEPNS, RC3, rabconnectin-3, KIAA0856	http://www.genecards.org/cgi-bin/carddisp.pl?gene=DMXL2
DNAJA4	DnaJ Heat Shock Protein Family (Hsp40) Member A4	MST104, MSTP104, PRO1472	http://www.genecards.org/cgi-bin/carddisp.pl?gene=DNAJA4
DNM2	Dynamin 2	CMT2M, CMTDI1, CMTDIB, DI-CMTB, DYNII, LCCS5, DYN2	http://www.genecards.org/cgi-bin/carddisp.pl?gene=DNM2
DOCK10	Dedicator Of Cytokinesis 10	zizimin3, DRIP2, Nbla10300, ZIZ3, KIAA0694, Zizimin-3	http://www.genecards.org/cgi-bin/carddisp.pl?gene=DOCK10
DPP7	Dipeptidyl Peptidase 7	DPPII, carboxytripeptidase, DPP2, QPP	http://www.genecards.org/cgi-bin/carddisp.pl?gene=DPP7
DPYSL3	Dihydropyrimidinase Like 3	ULIP1, ULIP-1, ULIP, DRP3, LCRMP, CRMP-4, CRMP4, DRP-3	http://www.genecards.org/cgi-bin/carddisp.pl?gene=DPYSL3
DPYSL4	Dihydropyrimidinase Like 4	CRMP-3, CRMP3, DRP-4, ULIP-4, ULIP4	http://www.genecards.org/cgi-bin/carddisp.pl?gene=DPYSL4
DRG2	Developmentally Regulated GTP Binding Protein 2	DRG-2	http://www.genecards.org/cgi-bin/carddisp.pl?gene=DRG2
DSP	Desmoplakin	desmoplakin, DCWHKTA, DP	http://www.genecards.org/cgi-bin/carddisp.pl?gene=DSP
ECD	Ecdysoneless Cell Cycle Regulator	GCR2, HSGT1, SGT1	http://www.genecards.org/cgi-bin/carddisp.pl?gene=ECD
ECE2	Endothelin Converting Enzyme 2	ECE-2, KIAA0604	http://www.genecards.org/cgi-bin/carddisp.pl?gene=ECE2
ECI2	Enoyl-CoA Delta Isomerase 2	DRS1, ACBD2, dJ1013A10.3, PECI, DRS-1, HCA88	http://www.genecards.org/cgi-bin/carddisp.pl?gene=ECI2
ECM1	Extracellular Matrix Protein 1	URBWD	http://www.genecards.org/cgi-bin/carddisp.pl?gene=ECM1
EED	Embryonic Ectoderm Development	HEED, WAIT1, WAIT-1	http://www.genecards.org/cgi-bin/carddisp.pl?gene=EED
EEF1A2	Eukaryotic Translation Elongation Factor 1 Alpha 2	EF1A, EEF1AL, statin-like, statin, statin-S1, STNL, STN, EF-1-alpha-2, eEF1A-2, EIEE33, HS1, MRD38	http://www.genecards.org/cgi-bin/carddisp.pl?gene=EEF1A2
EIF3A	Eukaryotic Translation Initiation Factor 3 Subunit A	p180, P167, TIF32, eIF3-p170, eIF3-theta, p185, EIF3, EIF3S10, eIF-3-theta, KIAA0139, eIF3a	http://www.genecards.org/cgi-bin/carddisp.pl?gene=EIF3A
EIF3F	Eukaryotic Translation Initiation Factor 3 Subunit F	eIF3-epsilon, eIF3-p47, EIF3S5, eIF-3-epsilon, eIF3f	http://www.genecards.org/cgi-bin/carddisp.pl?gene=EIF3F
EIF4A3	Eukaryotic Translation Initiation Factor 4A3	MUK34, NMP265, NUK34, RCPS, eIF4AIII, DDX48, eIF-4A-III, eIF4A-III, KIAA0111	http://www.genecards.org/cgi-bin/carddisp.pl?gene=EIF4A3
ELAC2	ElaC Ribonuclease Z 2	hPc2, COXPD17, ELC2	http://www.genecards.org/cgi-bin/carddisp.pl?gene=ELAC2
ELOF1	Elongation Factor 1 Homolog	ELF1	http://www.genecards.org/cgi-bin/carddisp.pl?gene=ELOF1
ELP2	Elongator Acetyltransferase Complex Subunit 2	StIP, stIP1, STATIP1, SHINC-2	http://www.genecards.org/cgi-bin/carddisp.pl?gene=ELP2
EMC1	ER Membrane Protein Complex Subunit 1	KIAA0090, CAVIPMR	http://www.genecards.org/cgi-bin/carddisp.pl?gene=EMC1
ENPP1	Ectonucleotide Pyrophosphatase/Phosphodiesterase 1	PCA1, ARHR2, COLED, NPP1, PC-1, M6S1, NPPS, PDNP1, PC1	http://www.genecards.org/cgi-bin/carddisp.pl?gene=ENPP1
EPN2	Epsin 2	EHB21, KIAA1065	http://www.genecards.org/cgi-bin/carddisp.pl?gene=EPN2
EPPK1	Epiplakin 1	EPIPL1, EPIPL	http://www.genecards.org/cgi-bin/carddisp.pl?gene=EPPK1
ERC2	ELKS/RAB6-Interacting/CAST Family Member 2	CAST1, ELKSL, SPBC110, Spc110, KIAA0378, CAST	http://www.genecards.org/cgi-bin/carddisp.pl?gene=ERC2
ERGIC1	Endoplasmic Reticulum-Golgi Intermediate Compartment 1	NET24, ERGIC-32, ERGIC32, KIAA1181	http://www.genecards.org/cgi-bin/carddisp.pl?gene=ERGIC1
ETFDH	Electron Transfer Flavoprotein Dehydrogenase	MADD, ETFQO, ETF-QO	http://www.genecards.org/cgi-bin/carddisp.pl?gene=ETFDH
EXOC8	Exocyst Complex Component 8	EXO84, Exo84p, SEC84	http://www.genecards.org/cgi-bin/carddisp.pl?gene=EXOC8
EXOSC5	Exosome Component 5	RRP41B, Rrp46p, hRrp46p, RRP46, p12B, CML28	http://www.genecards.org/cgi-bin/carddisp.pl?gene=EXOSC5
FAM102B	Family With Sequence Similarity 102 Member B	SYM-3B	http://www.genecards.org/cgi-bin/carddisp.pl?gene=FAM102B
FAM103A1	Family With Sequence Similarity 103 Member A1	RAM, HsT19360, C15orf18	http://www.genecards.org/cgi-bin/carddisp.pl?gene=FAM103A1
FAM118A	Family With Sequence Similarity 118 Member A	bK268H5.C22.4, C22orf8	http://www.genecards.org/cgi-bin/carddisp.pl?gene=FAM118A
FAM126A	Family With Sequence Similarity 126 Member A	a, HCC, HLD5, HYCC1, DRCTNNB1A	http://www.genecards.org/cgi-bin/carddisp.pl?gene=FAM126A
FAM162A	Family With Sequence Similarity 162 Member A	C3orf28, E2IG5, HGTD-P	http://www.genecards.org/cgi-bin/carddisp.pl?gene=FAM162A
FAM173A	Family With Sequence Similarity 173 Member A	C16orf24	http://www.genecards.org/cgi-bin/carddisp.pl?gene=FAM173A
FAM213A	Family With Sequence Similarity 213 Member A	PAMM, C10orf58	http://www.genecards.org/cgi-bin/carddisp.pl?gene=FAM213A
FAM84B	Family With Sequence Similarity 84 Member B	BCMP101, NSE2	http://www.genecards.org/cgi-bin/carddisp.pl?gene=FAM84B
FAM91A1	Family With Sequence Similarity 91 Member A1		http://www.genecards.org/cgi-bin/carddisp.pl?gene=FAM91A1
FAR1	Fatty Acyl-CoA Reductase 1	PFCRD, SDR10E1, MLSTD2	http://www.genecards.org/cgi-bin/carddisp.pl?gene=FAR1
FARP2	FERM, ARH/RhoGEF And Pleckstrin Domain Protein 2	KIAA0793, PLEKHC3, FRG, FIR	http://www.genecards.org/cgi-bin/carddisp.pl?gene=FARP2
FASN	Fatty Acid Synthase	OA-519, SDR27X1, FAS	http://www.genecards.org/cgi-bin/carddisp.pl?gene=FASN
FASTKD2	FAST Kinase Domains 2	KIAA0971	http://www.genecards.org/cgi-bin/carddisp.pl?gene=FASTKD2
FDFT1	Farnesyl-Diphosphate Farnesyltransferase 1	ERG9, SQS, SS, DGPT	http://www.genecards.org/cgi-bin/carddisp.pl?gene=FDFT1
FDPS	Farnesyl Diphosphate Synthase	dimethylallyltranstransferase, geranyltranstransferase, FPS, KIAA1293, FPPS, POROK9	http://www.genecards.org/cgi-bin/carddisp.pl?gene=FDPS
FGD4	FYVE, RhoGEF And PH Domain Containing 4	CMT4H, FRABP, ZFYVE6	http://www.genecards.org/cgi-bin/carddisp.pl?gene=FGD4
FIBP	FGF1 Intracellular Binding Protein	FGFIBP, FIBP-1	http://www.genecards.org/cgi-bin/carddisp.pl?gene=FIBP
FIS1	Fission, Mitochondrial 1	CGI-135, H_NH0132A01.6, TTC11, hFis1	http://www.genecards.org/cgi-bin/carddisp.pl?gene=FIS1
FKBP11	FK506 Binding Protein 11	rotamase, FKBP-11, FKBP-19, FKBP19	http://www.genecards.org/cgi-bin/carddisp.pl?gene=FKBP11
FKBP14	FK506 Binding Protein 14	rotamase, EDSKMH, IPBP12, FKBP-22, FKBP22, FKBP-14	http://www.genecards.org/cgi-bin/carddisp.pl?gene=FKBP14
FKBP8	FK506 Binding Protein 8	rotamase, FKBPr38, FKBP-38, FKBP-8, FKBP38, hFKBP38	http://www.genecards.org/cgi-bin/carddisp.pl?gene=FKBP8
FKBP9	FK506 Binding Protein 9	PPIASE, rotamase, FKBP-63, FKBP-9, FKBP60, FKBP63	http://www.genecards.org/cgi-bin/carddisp.pl?gene=FKBP9
FNTA	Farnesyltransferase, CAAX Box, Alpha	FPTA, PGGT1A, PTAR2, GGTase-I-alpha, FTase-alpha	http://www.genecards.org/cgi-bin/carddisp.pl?gene=FNTA
FTO	Fat Mass And Obesity Associated	ALKBH9, BMIQ14, GDFD, KIAA1752	http://www.genecards.org/cgi-bin/carddisp.pl?gene=FTO
FUCA1	Fucosidase, Alpha-L- 1, Tissue	FUCA	http://www.genecards.org/cgi-bin/carddisp.pl?gene=FUCA1
FUK	Fucokinase	Fucokinase, 1110046B12Rik	http://www.genecards.org/cgi-bin/carddisp.pl?gene=FUK
GAB2	GRB2 Associated Binding Protein 2	pp100, KIAA0571	http://www.genecards.org/cgi-bin/carddisp.pl?gene=GAB2
GABARAP	GABA Type A Receptor-Associated Protein	ATG8A, GABARAP-a, MM46, FLC3B	http://www.genecards.org/cgi-bin/carddisp.pl?gene=GABARAP
GALK2	Galactokinase 2	GK2	http://www.genecards.org/cgi-bin/carddisp.pl?gene=GALK2
GALNS	Galactosamine (N-Acetyl)-6-Sulfatase	GALNAC6S, GAS, MPS4A, chondroitinase, chondroitinsulfatase, GalN6S	http://www.genecards.org/cgi-bin/carddisp.pl?gene=GALNS
GAS2L3	Growth Arrest Specific 2 Like 3	G2L3	http://www.genecards.org/cgi-bin/carddisp.pl?gene=GAS2L3
GCAT	Glycine C-Acetyltransferase	KBL	http://www.genecards.org/cgi-bin/carddisp.pl?gene=GCAT
GDF15	Growth Differentiation Factor 15	MIC1, Mic-1, PTGF-beta, GDF-15, NAG-1, NRG-1, PDF, PLAB, PTGFB	http://www.genecards.org/cgi-bin/carddisp.pl?gene=GDF15
GEMIN5	Gem Nuclear Organelle Associated Protein 5	GEMIN-5, Gemin5	http://www.genecards.org/cgi-bin/carddisp.pl?gene=GEMIN5
GGA2	Golgi Associated, Gamma Adaptin Ear Containing, ARF Binding Protein 2	VEAR, KIAA1080	http://www.genecards.org/cgi-bin/carddisp.pl?gene=GGA2
GGCX	Gamma-Glutamyl Carboxylase	GC, VKCFD1	http://www.genecards.org/cgi-bin/carddisp.pl?gene=GGCX
GGH	Gamma-Glutamyl Hydrolase	conjugase, GH	http://www.genecards.org/cgi-bin/carddisp.pl?gene=GGH
GINS4	GINS Complex Subunit 4	SLD5	http://www.genecards.org/cgi-bin/carddisp.pl?gene=GINS4
GLB1	Galactosidase Beta 1	EBP, MPS4B, lactase, ELNR1	http://www.genecards.org/cgi-bin/carddisp.pl?gene=GLB1
GLMP	Glycosylated Lysosomal Membrane Protein	C1orf85, NCU-G1	http://www.genecards.org/cgi-bin/carddisp.pl?gene=GLMP
GM2A	GM2 Ganglioside Activator	GM2-AP, SAP-3	http://www.genecards.org/cgi-bin/carddisp.pl?gene=GM2A
GMDS	GDP-Mannose 4,6-Dehydratase	SDR3E1, GMD	http://www.genecards.org/cgi-bin/carddisp.pl?gene=GMDS
GNA11	G Protein Subunit Alpha 11	FBH, FBH2, FHH2, GNA-11, HYPOC2, GA11, HHC2	http://www.genecards.org/cgi-bin/carddisp.pl?gene=GNA11
GNPDA1	Glucosamine-6-Phosphate Deaminase 1	oscillin, GNP1, GNPDA, GPI, GNPI, HLN, KIAA0060	http://www.genecards.org/cgi-bin/carddisp.pl?gene=GNPDA1
GNPTAB	N-Acetylglucosamine-1-Phosphate Transferase Alpha And Beta Subunits	ICD, GNPTA, KIAA1208	http://www.genecards.org/cgi-bin/carddisp.pl?gene=GNPTAB
GNPTG	N-Acetylglucosamine-1-Phosphate Transferase Gamma Subunit	C16orf27, GNPTAG, RJD9, LP2537	http://www.genecards.org/cgi-bin/carddisp.pl?gene=GNPTG
GNS	Glucosamine (N-Acetyl)-6-Sulfatase	N-acetylglucosamine-6-sulfatase, glucosamine-6-sulfatase, G6S	http://www.genecards.org/cgi-bin/carddisp.pl?gene=GNS
GOLGA4	Golgin A4	CRPF46, GOLG, MU-RMS-40.18, golgin-240, golgin-245, p230, GCP2	http://www.genecards.org/cgi-bin/carddisp.pl?gene=GOLGA4
GPAT4	Glycerol-3-Phosphate Acyltransferase 4	zeta, LPAATZ, TSARG7, AGPAT6, LPAAT-zeta	http://www.genecards.org/cgi-bin/carddisp.pl?gene=GPAT4
GPC1	Glypican 1	glypican	http://www.genecards.org/cgi-bin/carddisp.pl?gene=GPC1
GPC6	Glypican 6	OMIMD1	http://www.genecards.org/cgi-bin/carddisp.pl?gene=GPC6
GPM6B	Glycoprotein M6B	M6B	http://www.genecards.org/cgi-bin/carddisp.pl?gene=GPM6B
GPR161	G Protein-Coupled Receptor 161	RE2	http://www.genecards.org/cgi-bin/carddisp.pl?gene=GPR161
GPR180	G Protein-Coupled Receptor 180	ITR	http://www.genecards.org/cgi-bin/carddisp.pl?gene=GPR180
GPRC5B	G Protein-Coupled Receptor Class C Group 5 Member B	A-69G12.1, RAIG2, RAIG-2	http://www.genecards.org/cgi-bin/carddisp.pl?gene=GPRC5B
GRAMD4	GRAM Domain Containing 4	death-inducing-protein, dA59H18.1, dJ439F8.1, DIP, KIAA0767	http://www.genecards.org/cgi-bin/carddisp.pl?gene=GRAMD4
GSN	Gelsolin	ADF, gelsolin, amyloidosis, brevin, AGEL	http://www.genecards.org/cgi-bin/carddisp.pl?gene=GSN
GSTM2	Glutathione S-Transferase Mu 2 (Muscle)	GSTM, GTHMUS, GST4, GSTM2-2	http://www.genecards.org/cgi-bin/carddisp.pl?gene=GSTM2
GTF3C1	General Transcription Factor IIIC Subunit 1	TFIIIC, TFIIICalpha, TF3C-alpha, TFIIIC220	http://www.genecards.org/cgi-bin/carddisp.pl?gene=GTF3C1
GTPBP10	GTP Binding Protein 10 (Putative)	UG0751c10, ObgH2	http://www.genecards.org/cgi-bin/carddisp.pl?gene=GTPBP10
GUSB	Glucuronidase Beta	BG, MPS7, beta-D-glucuronidase, beta-G1	http://www.genecards.org/cgi-bin/carddisp.pl?gene=GUSB
GYS1	Glycogen Synthase 1	GSY, GYS	http://www.genecards.org/cgi-bin/carddisp.pl?gene=GYS1
H3F3B	H3 Histone, Family 3B (H3.3B)	H3F3, H3.3A, H3.3B	http://www.genecards.org/cgi-bin/carddisp.pl?gene=H3F3B
HACD3	3-Hydroxyacyl-CoA Dehydratase 3	B-IND1, HSPC121, PTPLAD1, BIND1, hB-ind1	http://www.genecards.org/cgi-bin/carddisp.pl?gene=HACD3
HADH	Hydroxyacyl-CoA Dehydrogenase	HCDH, HAD, HADH1, HHF4, MSCHAD, HADHSC, SCHAD	http://www.genecards.org/cgi-bin/carddisp.pl?gene=HADH
HAUS8	HAUS Augmin Like Complex Subunit 8	DGT4, NY-SAR-48, HICE1	http://www.genecards.org/cgi-bin/carddisp.pl?gene=HAUS8
HBS1L	HBS1 Like Translational GTPase	EF-1a, HSPC276, eRF3c, ERFS, HBS1, KIAA1038	http://www.genecards.org/cgi-bin/carddisp.pl?gene=HBS1L
HDAC2	Histone Deacetylase 2	RPD3, YAF1, HD2	http://www.genecards.org/cgi-bin/carddisp.pl?gene=HDAC2
HDHD2	Haloacid Dehalogenase Like Hydrolase Domain Containing 2	3110052N05Rik, HEL-S-301	http://www.genecards.org/cgi-bin/carddisp.pl?gene=HDHD2
HDHD3	Haloacid Dehalogenase Like Hydrolase Domain Containing 3	2810435D12Rik, C9orf158	http://www.genecards.org/cgi-bin/carddisp.pl?gene=HDHD3
HEATR3	HEAT Repeat Containing 3	SYO1	http://www.genecards.org/cgi-bin/carddisp.pl?gene=HEATR3
HECTD3	HECT Domain E3 Ubiquitin Protein Ligase 3		http://www.genecards.org/cgi-bin/carddisp.pl?gene=HECTD3
HERC1	HECT And RLD Domain Containing E3 Ubiquitin Protein Ligase Family Member 1	p532, p619	http://www.genecards.org/cgi-bin/carddisp.pl?gene=HERC1
HERC4	HECT And RLD Domain Containing E3 Ubiquitin Protein Ligase 4	KIAA1593	http://www.genecards.org/cgi-bin/carddisp.pl?gene=HERC4
HEXA	Hexosaminidase Subunit Alpha	TSD	http://www.genecards.org/cgi-bin/carddisp.pl?gene=HEXA
HEXB	Hexosaminidase Subunit Beta	ENC-1AS, HEL-248, HEL-S-111, HCC-7	http://www.genecards.org/cgi-bin/carddisp.pl?gene=HEXB
HIGD2A	HIG1 Hypoxia Inducible Domain Family Member 2A	RCF1b	http://www.genecards.org/cgi-bin/carddisp.pl?gene=HIGD2A
HIP1R	Huntingtin Interacting Protein 1 Related	ILWEQ, HIP3, HIP-12, HIP12, KIAA0655	http://www.genecards.org/cgi-bin/carddisp.pl?gene=HIP1R
HIST1H3A	Histone Cluster 1, H3a	H3FA, H3FB, H3FC, H3FD, H3FF, H3FH, H3FI, H3FJ, H3FK, H3FL, H3/A	http://www.genecards.org/cgi-bin/carddisp.pl?gene=HIST1H3A
HLTF	Helicase-Like Transcription Factor	HLTF1, RNF80, ZBU1, SMARCA3, SNF2L3, HIP116, HIP116A	http://www.genecards.org/cgi-bin/carddisp.pl?gene=HLTF
HM13	Histocompatibility (Minor) 13	IMPAS, MSTP086, PSENL3, SPPL1, H13, hIMP1, IMP1, IMPAS-1, PSL3, SPP, IMP-1	http://www.genecards.org/cgi-bin/carddisp.pl?gene=HM13
HMGCS1	3-Hydroxy-3-Methylglutaryl-CoA Synthase 1	HMGCS	http://www.genecards.org/cgi-bin/carddisp.pl?gene=HMGCS1
HMHA1	Histocompatibility (Minor) HA-1	ARHGAP45, HA-1, HLA-HA1, KIAA0223	http://www.genecards.org/cgi-bin/carddisp.pl?gene=HMHA1
HNRNPA3	Heterogeneous Nuclear Ribonucleoprotein A3	2610510D13Rik, D10S102, FBRNP, HNRPA3	http://www.genecards.org/cgi-bin/carddisp.pl?gene=HNRNPA3
HPDL	4-Hydroxyphenylpyruvate Dioxygenase Like	4-HPPD-L, GLOXD1	http://www.genecards.org/cgi-bin/carddisp.pl?gene=HPDL
HPS3	HPS3, Biogenesis Of Lysosomal Organelles Complex 2 Subunit 1	BLOC2S1, SUTAL	http://www.genecards.org/cgi-bin/carddisp.pl?gene=HPS3
HSD17B11	Hydroxysteroid (17-Beta) Dehydrogenase 11	17-BETA-HSD11, 17-BETA-HSDXI, 17BHSD11, RETSDR2, DHRS8, PAN1B, SDR16C2, 17betaHSD11, 17betaHSDXI	http://www.genecards.org/cgi-bin/carddisp.pl?gene=HSD17B11
HSD17B7	Hydroxysteroid (17-Beta) Dehydrogenase 7	PRAP, SDR37C1	http://www.genecards.org/cgi-bin/carddisp.pl?gene=HSD17B7
HSP90AB2P	Heat Shock Protein 90kDa Alpha Family Class B Member 2, Pseudogene	HSP90BB	http://www.genecards.org/cgi-bin/carddisp.pl?gene=HSP90AB2P
HSPA14	Heat Shock Protein Family A (Hsp70) Member 14	HSP70-4, HSP70L1, HSP60	http://www.genecards.org/cgi-bin/carddisp.pl?gene=HSPA14
HSPA1B	Heat Shock Protein Family A (Hsp70) Member 1B	HSP70-1/HSP70-2, HSP70.1/HSP70.2, HSP70-1B, HSP70-2, HSP70.2	http://www.genecards.org/cgi-bin/carddisp.pl?gene=HSPA1B
HSPA4L	Heat Shock Protein Family A (Hsp70) Member 4 Like	APG1, APG-1, HSPH3, Osp94	http://www.genecards.org/cgi-bin/carddisp.pl?gene=HSPA4L
IARS2	Isoleucyl-TRNA Synthetase 2, Mitochondrial	mitochondrial, ILERS, CAGSSS	http://www.genecards.org/cgi-bin/carddisp.pl?gene=IARS2
IDE	Insulin Degrading Enzyme	insulysin, insulinase	http://www.genecards.org/cgi-bin/carddisp.pl?gene=IDE
IDI1	Isopentenyl-Diphosphate Delta Isomerase 1	IPP1, IPPI1	http://www.genecards.org/cgi-bin/carddisp.pl?gene=IDI1
IGSF3	Immunoglobulin Superfamily Member 3	LCDD, V8, EWI-3, EWI3, IgSF3, KIAA0466	http://www.genecards.org/cgi-bin/carddisp.pl?gene=IGSF3
IGSF8	Immunoglobulin Superfamily Member 8	CD316, CD81P3, EWI-2, EWI2, KCT-4, LIR-D1, PGRL, KCT4, IgSF8	http://www.genecards.org/cgi-bin/carddisp.pl?gene=IGSF8
IKBKB	Inhibitor Of Kappa Light Polypeptide Gene Enhancer In B-Cells, Kinase Beta	IMD15, IKK-B, IKK-beta, IKK2, IKKB, NFKBIKB, IkBKB	http://www.genecards.org/cgi-bin/carddisp.pl?gene=IKBKB
ILF3	Interleukin Enhancer Binding Factor 3	CBTF, MMP4, NF110, NF110b, NF90a, NF90b, NFAR-1, NFAR2, TCP110, DRBF, DRBP76, MPHOSPH4, MPP4, NF-AT-90, NF90, NFAR, TCP80	http://www.genecards.org/cgi-bin/carddisp.pl?gene=ILF3
IMP3	IMP3, U3 Small Nucleolar Ribonucleoprotein	C15orf12, MRPS4, BRMS2	http://www.genecards.org/cgi-bin/carddisp.pl?gene=IMP3
IMPDH1	IMP (Inosine 5'-Monophosphate) Dehydrogenase 1	IMPD, LCA11, sWSS2608, RP10, IMPD1, IMPDH-I	http://www.genecards.org/cgi-bin/carddisp.pl?gene=IMPDH1
ING5	Inhibitor Of Growth Family Member 5	p28ING5	http://www.genecards.org/cgi-bin/carddisp.pl?gene=ING5
INTS3	Integrator Complex Subunit 3	INT3, SOSSA, C1orf60, C1orf193, SOSS-A	http://www.genecards.org/cgi-bin/carddisp.pl?gene=INTS3
IPO11	Importin 11	imp11, RanBP11	http://www.genecards.org/cgi-bin/carddisp.pl?gene=IPO11
IPO5	Importin 5	IMB3, Pse1, imp5, KPNB3, RANBP5	http://www.genecards.org/cgi-bin/carddisp.pl?gene=IPO5
IPO8	Importin 8	imp8, RANBP8	http://www.genecards.org/cgi-bin/carddisp.pl?gene=IPO8
IPO9	Importin 9	ranBP9, Imp9, KIAA1192	http://www.genecards.org/cgi-bin/carddisp.pl?gene=IPO9
IQGAP2	IQ Motif Containing GTPase Activating Protein 2		http://www.genecards.org/cgi-bin/carddisp.pl?gene=IQGAP2
ISOC2	Isochorismatase Domain Containing 2		http://www.genecards.org/cgi-bin/carddisp.pl?gene=ISOC2
ISYNA1	Inositol-3-Phosphate Synthase 1	INOS, IPS, IPS-1, INO1, hINO1, hIPS	http://www.genecards.org/cgi-bin/carddisp.pl?gene=ISYNA1
ITGA7	Integrin Subunit Alpha 7		http://www.genecards.org/cgi-bin/carddisp.pl?gene=ITGA7
ITPR2	Inositol 1,4,5-Trisphosphate Receptor Type 2	ANHD, CFAP48, INSP3R2, IP3R2	http://www.genecards.org/cgi-bin/carddisp.pl?gene=ITPR2
IVNS1ABP	Influenza Virus NS1A Binding Protein	HSPC068, KLHL39, ND1, NS-1, FLARA3, NS1-BP, NS1BP, ARA3, KIAA0850, NS1	http://www.genecards.org/cgi-bin/carddisp.pl?gene=IVNS1ABP
JMJD6	Arginine Demethylase And Lysine Hydroxylase	PTDSR1, PTDSR, KIAA0585, PSR	http://www.genecards.org/cgi-bin/carddisp.pl?gene=JMJD6
KANK1	KN Motif And Ankyrin Repeat Domains 1	ANKRD15, CPSQ2, KANK, KIAA0172	http://www.genecards.org/cgi-bin/carddisp.pl?gene=KANK1
KCNAB2	Potassium Voltage-Gated Channel Subfamily A Regulatory Beta Subunit 2	AKR6A5, HKvbeta2, HKvbeta2.1, HKvbeta2.2, KV-BETA-2, KCNA2B, KCNK2	http://www.genecards.org/cgi-bin/carddisp.pl?gene=KCNAB2
KCTD12	Potassium Channel Tetramerization Domain Containing 12	PFETIN, C13orf2, PFET1, KIAA1778	http://www.genecards.org/cgi-bin/carddisp.pl?gene=KCTD12
KDM1A	Lysine Demethylase 1A	BHC110, CPRF, AOF2, KDM1, LSD1, KIAA0601	http://www.genecards.org/cgi-bin/carddisp.pl?gene=KDM1A
KDM2A	Lysine Demethylase 2A	FBL7, FBL11, LILINA, FBXL11, CXXC8, JHDM1A, KIAA1004	http://www.genecards.org/cgi-bin/carddisp.pl?gene=KDM2A
KDM3B	Lysine Demethylase 3B	5qNCA, NET22, C5orf7, JMJD1B, JHDM2B, KIAA1082	http://www.genecards.org/cgi-bin/carddisp.pl?gene=KDM3B
KIAA0930	KIAA0930	KIAA0930, LSC3, C22orf9	http://www.genecards.org/cgi-bin/carddisp.pl?gene=KIAA0930
KIAA1033	KIAA1033	KIAA1033, MRT43, SWIP	http://www.genecards.org/cgi-bin/carddisp.pl?gene=KIAA1033
KIAA1524	KIAA1524	P90, KIAA1524, CIP2A	http://www.genecards.org/cgi-bin/carddisp.pl?gene=KIAA1524
KIF1B	Kinesin Family Member 1B	CMT2A1, HMSNII, KLP, NBLST1, CMT2, CMT2A, KIAA0591, KIAA1448	http://www.genecards.org/cgi-bin/carddisp.pl?gene=KIF1B
KIF23	Kinesin Family Member 23	CHO1, MKLP-1, KNSL5, MKLP1	http://www.genecards.org/cgi-bin/carddisp.pl?gene=KIF23
KIF2A	Kinesin Heavy Chain Member 2A	HK2, KIF2, CDCBM3, kinesin-2, KNS2	http://www.genecards.org/cgi-bin/carddisp.pl?gene=KIF2A
KIF4B	Kinesin Family Member 4B	chromokinesin-B	http://www.genecards.org/cgi-bin/carddisp.pl?gene=KIF4B
KMT2D	Lysine Methyltransferase 2D	ALR, KMS, MLL2, MLL4, AAD10, CAGL114, KABUK1, TNRC21	http://www.genecards.org/cgi-bin/carddisp.pl?gene=KMT2D
KPNA1	Karyopherin Subunit Alpha 1	IPOA5, SRP1, importin-alpha-S1, NPI-1, RCH2, SRP1-beta	http://www.genecards.org/cgi-bin/carddisp.pl?gene=KPNA1
KPNA3	Karyopherin Subunit Alpha 3	SRP1, QIP2, IPOA4, SRP1gamma, SRP4, hSRP1, importin-alpha-Q2, SRP1-gamma	http://www.genecards.org/cgi-bin/carddisp.pl?gene=KPNA3
KPNA4	Karyopherin Subunit Alpha 4	IPOA3, SRP3, QIP1	http://www.genecards.org/cgi-bin/carddisp.pl?gene=KPNA4
L2HGDH	L-2-Hydroxyglutarate Dehydrogenase	L2HGA, duranin, C14orf160	http://www.genecards.org/cgi-bin/carddisp.pl?gene=L2HGDH
LAGE3	L Antigen Family Member 3	CVG5, DXS9951E, DXS9879E, ESO3, ITBA2	http://www.genecards.org/cgi-bin/carddisp.pl?gene=LAGE3
LAMA1	Laminin Subunit Alpha 1	PTBHS, S-LAM-alpha, LAMA	http://www.genecards.org/cgi-bin/carddisp.pl?gene=LAMA1
LAMA4	Laminin Subunit Alpha 4	CMD1JJ, LAMA3, LAMA4*-1	http://www.genecards.org/cgi-bin/carddisp.pl?gene=LAMA4
LAMTOR3	Late Endosomal/Lysosomal Adaptor, MAPK And MTOR Activator 3	MAPBP, MP1, PRO0633, Ragulator3, MAP2K1IP1, MAPKSP1	http://www.genecards.org/cgi-bin/carddisp.pl?gene=LAMTOR3
LDAH	Lipid Droplet Associated Hydrolase	C2orf43, hLDAH	http://www.genecards.org/cgi-bin/carddisp.pl?gene=LDAH
LDHA	Lactate Dehydrogenase A	GSD11, HEL-S-133P, LDHM, PIG19, LDH-A, LDH-M	http://www.genecards.org/cgi-bin/carddisp.pl?gene=LDHA
LDHB	Lactate Dehydrogenase B	LDHBD, TRG-5, LDH-B, LDH-H, HEL-S-281	http://www.genecards.org/cgi-bin/carddisp.pl?gene=LDHB
LDLRAP1	Low Density Lipoprotein Receptor Adaptor Protein 1	ARH1, ARH2, FHCB1, FHCB2, ARH	http://www.genecards.org/cgi-bin/carddisp.pl?gene=LDLRAP1
LENG8	Leukocyte Receptor Cluster (LRC) Member 8	pp13842, KIAA1932	http://www.genecards.org/cgi-bin/carddisp.pl?gene=LENG8
LGALS3	Lectin, Galactoside Binding Soluble 3	CBP35, GAL3, GALIG, L31, LGALS2, GALBP, MAC2, Gal-3, L-31	http://www.genecards.org/cgi-bin/carddisp.pl?gene=LGALS3
LGALS3BP	Lectin, Galactoside Binding Soluble 3 Binding Protein	90K, BTBD17B, CyCAP, MAC-2-BP, TANGO10B, gp90, M2BP, MAC2BP	http://www.genecards.org/cgi-bin/carddisp.pl?gene=LGALS3BP
LHPP	Phospholysine Phosphohistidine Inorganic Pyrophosphate Phosphatase	HDHD2B, hLHPP	http://www.genecards.org/cgi-bin/carddisp.pl?gene=LHPP
LIG1	DNA Ligase 1		http://www.genecards.org/cgi-bin/carddisp.pl?gene=LIG1
LIPA	Lipase A, Lysosomal Acid Type	CESD, LAL	http://www.genecards.org/cgi-bin/carddisp.pl?gene=LIPA
LONP2	Lon Peptidase 2, Peroxisomal	LONP, LONPL	http://www.genecards.org/cgi-bin/carddisp.pl?gene=LONP2
LOXL4	Lysyl Oxidase Like 4	LOXC	http://www.genecards.org/cgi-bin/carddisp.pl?gene=LOXL4
LPCAT1	Lysophosphatidylcholine Acyltransferase 1	AGPAT10, AGPAT9, lpcat, lysoPAFAT, AYTL2, LPCAT-1, PFAAP3	http://www.genecards.org/cgi-bin/carddisp.pl?gene=LPCAT1
LPGAT1	Lysophosphatidylglycerol Acyltransferase 1	FAM34A1, NET8, FAM34A, KIAA0205	http://www.genecards.org/cgi-bin/carddisp.pl?gene=LPGAT1
LRPPRC	Leucine Rich Pentatricopeptide Repeat Containing	LSFC, LRP130, CLONE-23970, GP130	http://www.genecards.org/cgi-bin/carddisp.pl?gene=LRPPRC
LSM7	LSM7 Homolog, U6 Small Nuclear RNA And MRNA Degradation Associated	YNL147W	http://www.genecards.org/cgi-bin/carddisp.pl?gene=LSM7
LSS	Lanosterol Synthase (2,3-Oxidosqualene-Lanosterol Cyclase)	CTRCT44, OSC, hOSC	http://www.genecards.org/cgi-bin/carddisp.pl?gene=LSS
LTA4H	Leukotriene A4 Hydrolase	LTA4	http://www.genecards.org/cgi-bin/carddisp.pl?gene=LTA4H
MAD2L1	MAD2 Mitotic Arrest Deficient-Like 1 (Yeast)	HSMAD2, MAD2	http://www.genecards.org/cgi-bin/carddisp.pl?gene=MAD2L1
MAGEA3	MAGE Family Member A3	HIP8, HYPD, MAGEA6, MAGE3, CT1.3	http://www.genecards.org/cgi-bin/carddisp.pl?gene=MAGEA3
MAN1B1	Mannosidase Alpha Class 1B Member 1	ERMAN1, ERManI, MANA-ER, MRT15	http://www.genecards.org/cgi-bin/carddisp.pl?gene=MAN1B1
MAN2A1	Mannosidase Alpha Class 2A Member 1	GOLIM7, MANII, MANA2	http://www.genecards.org/cgi-bin/carddisp.pl?gene=MAN2A1
MAN2C1	Mannosidase Alpha Class 2C Member 1	MAN6A8, MANA, MANA1	http://www.genecards.org/cgi-bin/carddisp.pl?gene=MAN2C1
MAP1A	Microtubule Associated Protein 1A	MTAP1A, MAP1L, MAP-1A	http://www.genecards.org/cgi-bin/carddisp.pl?gene=MAP1A
MAP3K2	Mitogen-Activated Protein Kinase Kinase Kinase 2	MAPKKK2, MEKK2, MEKK2B	http://www.genecards.org/cgi-bin/carddisp.pl?gene=MAP3K2
MAP9	Microtubule Associated Protein 9	ASAP	http://www.genecards.org/cgi-bin/carddisp.pl?gene=MAP9
MAPK3	Mitogen-Activated Protein Kinase 3	PRKM3, ERK-1, ERK1, ERT2, p44-ERK1, p44-MAPK, HS44KDAP, HUMKER1A, P44ERK1, P44MAPK	http://www.genecards.org/cgi-bin/carddisp.pl?gene=MAPK3
MAPRE2	Microtubule Associated Protein RP/EB Family Member 2	EB1, CSCSC2, EB2, RP1	http://www.genecards.org/cgi-bin/carddisp.pl?gene=MAPRE2
MAT2A	Methionine Adenosyltransferase 2A	MATII, SAMS2, MAT-II, MATA2, AMS2	http://www.genecards.org/cgi-bin/carddisp.pl?gene=MAT2A
MBD2	Methyl-CpG Binding Domain Protein 2	NY-CO-41, demethylase, DMTase	http://www.genecards.org/cgi-bin/carddisp.pl?gene=MBD2
MBLAC2	Metallo-Beta-Lactamase Domain Containing 2		http://www.genecards.org/cgi-bin/carddisp.pl?gene=MBLAC2
MCC	Mutated In Colorectal Cancers	MCC1	http://www.genecards.org/cgi-bin/carddisp.pl?gene=MCC
MCCC2	Methylcrotonoyl-CoA Carboxylase 2	MCCB	http://www.genecards.org/cgi-bin/carddisp.pl?gene=MCCC2
MCM2	Minichromosome Maintenance Complex Component 2	mitotin, D3S3194, cdc19, CCNL1, CDCL1, BM28, KIAA0030	http://www.genecards.org/cgi-bin/carddisp.pl?gene=MCM2
MCM5	Minichromosome Maintenance Complex Component 5	CDC46, P1-CDC46	http://www.genecards.org/cgi-bin/carddisp.pl?gene=MCM5
MCM7	Minichromosome Maintenance Complex Component 7	P1CDC47, P85MCM, PNAS146, PPP1R104, MCM2, CDC47, P1.1-MCM3	http://www.genecards.org/cgi-bin/carddisp.pl?gene=MCM7
MCMBP	Minichromosome Maintenance Complex Binding Protein	MCM-BP, C10orf119	http://www.genecards.org/cgi-bin/carddisp.pl?gene=MCMBP
MCU	Mitochondrial Calcium Uniporter	C10orf42, CCDC109A	http://www.genecards.org/cgi-bin/carddisp.pl?gene=MCU
MDN1	Midasin AAA ATPase 1	Rea1, KIAA0301	http://www.genecards.org/cgi-bin/carddisp.pl?gene=MDN1
ME2	Malic Enzyme 2	mitochondrial, ODS1, NAD-ME	http://www.genecards.org/cgi-bin/carddisp.pl?gene=ME2
MED16	Mediator Complex Subunit 16	TRAP95, THRAP5, DRIP92	http://www.genecards.org/cgi-bin/carddisp.pl?gene=MED16
MED17	Mediator Complex Subunit 17	CRSP77, CRSP6, ARC77, DRIP80, TRAP80, DRIP77	http://www.genecards.org/cgi-bin/carddisp.pl?gene=MED17
MED19	Mediator Complex Subunit 19	DT2P1G7, MED19AS, LCMR1	http://www.genecards.org/cgi-bin/carddisp.pl?gene=MED19
MED24	Mediator Complex Subunit 24	CRSP100, MED5, CRSP4, THRAP4, ARC100, DRIP100, TRAP100, KIAA0130, hTRAP100	http://www.genecards.org/cgi-bin/carddisp.pl?gene=MED24
METAP1	Methionyl Aminopeptidase 1	MAP1A, MetAP1A, KIAA0094	http://www.genecards.org/cgi-bin/carddisp.pl?gene=METAP1
METAP1D	Methionyl Aminopeptidase Type 1D (Mitochondrial)	Metap1l, MAP1D	http://www.genecards.org/cgi-bin/carddisp.pl?gene=METAP1D
METTL9	Methyltransferase Like 9	CTB-31N19.3, PAP1, CGI-81, DREV, DREV1	http://www.genecards.org/cgi-bin/carddisp.pl?gene=METTL9
MFGE8	Milk Fat Globule-EGF Factor 8 Protein	BA46, EDIL1, HsT19888, OAcGD3S, hP47, medin, SPAG10, HMFG, MFG-E8, MFGM, SED1	http://www.genecards.org/cgi-bin/carddisp.pl?gene=MFGE8
MFN1	Mitofusin 1	hfzo1, hfzo2	http://www.genecards.org/cgi-bin/carddisp.pl?gene=MFN1
MICAL1	Microtubule Associated Monooxygenase, Calponin And LIM Domain Containing 1	MICAL, NICAL, MICAL-1	http://www.genecards.org/cgi-bin/carddisp.pl?gene=MICAL1
MID1	Midline 1	ZNFXY, FXY, RNF59, TRIM18, XPRF, BBBG1, GBBB1, MIDIN, OGS1, OS, OSX	http://www.genecards.org/cgi-bin/carddisp.pl?gene=MID1
MIER1	MIER1 Transcriptional Regulator	ER1, MI-ER1, KIAA1610, hMi-er1	http://www.genecards.org/cgi-bin/carddisp.pl?gene=MIER1
MINA	MYC Induced Nuclear Antigen	MDIG, MINA53, NO52, ROX	http://www.genecards.org/cgi-bin/carddisp.pl?gene=MINA
MIPEP	Mitochondrial Intermediate Peptidase	MIP, HMIP	http://www.genecards.org/cgi-bin/carddisp.pl?gene=MIPEP
MKI67	Marker Of Proliferation Ki-67	KIA, MIB-, MIB-1, PPP1R105	http://www.genecards.org/cgi-bin/carddisp.pl?gene=MKI67
MLANA	Melan-A	melan-A, MART-1, MART1	http://www.genecards.org/cgi-bin/carddisp.pl?gene=MLANA
MLXIP	MLX Interacting Protein	MIR, MONDOA, bHLHe36, KIAA0867	http://www.genecards.org/cgi-bin/carddisp.pl?gene=MLXIP
MMAA	Methylmalonic Aciduria (Cobalamin Deficiency) CblA Type	cblA	http://www.genecards.org/cgi-bin/carddisp.pl?gene=MMAA
MMS19	MMS19 Homolog, Cytosolic Iron-Sulfur Assembly Component	MET18, MMS19L, hMMS19	http://www.genecards.org/cgi-bin/carddisp.pl?gene=MMS19
MNAT1	MNAT1, CDK Activating Kinase Assembly Factor	p35, P36, TFB3, CAP35, MAT1, RNF66	http://www.genecards.org/cgi-bin/carddisp.pl?gene=MNAT1
MON1B	MON1 Homolog B, Secretory Trafficking Associated	SRG1, HSRG1, SAND2, KIAA0872	http://www.genecards.org/cgi-bin/carddisp.pl?gene=MON1B
MON2	MON2 Homolog, Regulator Of Endosome-To-Golgi Trafficking	SF21, KIAA1040	http://www.genecards.org/cgi-bin/carddisp.pl?gene=MON2
MPC2	Mitochondrial Pyruvate Carrier 2	BRP44	http://www.genecards.org/cgi-bin/carddisp.pl?gene=MPC2
MPP1	Membrane Palmitoylated Protein 1	MRG1, AAG12, p55, PEMP, DXS552E, EMP55	http://www.genecards.org/cgi-bin/carddisp.pl?gene=MPP1
MPST	Mercaptopyruvate Sulfurtransferase	MST, TUM1, TST2	http://www.genecards.org/cgi-bin/carddisp.pl?gene=MPST
MPV17	MPV17, Mitochondrial Inner Membrane Protein	glomerulosclerosis, MTDPS6, SYM1	http://www.genecards.org/cgi-bin/carddisp.pl?gene=MPV17
MREG	Melanoregulin	melanoregulin, WDT2, DSU	http://www.genecards.org/cgi-bin/carddisp.pl?gene=MREG
MRPL2	Mitochondrial Ribosomal Protein L2	MRP-L14, CGI-22, RPML14, L2mt, MRP-L2	http://www.genecards.org/cgi-bin/carddisp.pl?gene=MRPL2
MRPL3	Mitochondrial Ribosomal Protein L3	COXPD9, RPML3, L3mt, MRL3, MRP-L3	http://www.genecards.org/cgi-bin/carddisp.pl?gene=MRPL3
MRPL37	Mitochondrial Ribosomal Protein L37	L2mt, MRP-L2, L37mt, MRP-L37, MRPL2, RPML2	http://www.genecards.org/cgi-bin/carddisp.pl?gene=MRPL37
MRPL54	Mitochondrial Ribosomal Protein L54	L54mt, MRP-L54	http://www.genecards.org/cgi-bin/carddisp.pl?gene=MRPL54
MRPS24	Mitochondrial Ribosomal Protein S24	bMRP-47, bMRP47, HSPC335, MRP-S24, S24mt	http://www.genecards.org/cgi-bin/carddisp.pl?gene=MRPS24
MRPS34	Mitochondrial Ribosomal Protein S34	MRPS12, MRP-S34, S34mt, MRP-S12	http://www.genecards.org/cgi-bin/carddisp.pl?gene=MRPS34
MRTO4	MRT4 Homolog, Ribosome Maturation Factor	dJ657E11.4, C1orf33, MRT4	http://www.genecards.org/cgi-bin/carddisp.pl?gene=MRTO4
MSH2	MutS Homolog 2	HNPCC, FCC1, HNPCC1, LCFS2, COCA1, hMSH2	http://www.genecards.org/cgi-bin/carddisp.pl?gene=MSH2
MSH3	MutS Homolog 3	MRP1, DUP, hMSH3, DUC1, DUG	http://www.genecards.org/cgi-bin/carddisp.pl?gene=MSH3
MSH6	MutS Homolog 6	HNPCC5, HSAP, GTBP, GTMBP, p160, hMSH6	http://www.genecards.org/cgi-bin/carddisp.pl?gene=MSH6
MSI2	Musashi RNA Binding Protein 2	MSI2H, musashi-2	http://www.genecards.org/cgi-bin/carddisp.pl?gene=MSI2
MT-ATP6	Mitochondrially Encoded ATP Synthase 6	ATPase6, MTATP6, ATP6	http://www.genecards.org/cgi-bin/carddisp.pl?gene=MT-ATP6
MT-CO1	Mitochondrially Encoded Cytochrome C Oxidase I	COX1, MTCO1, COI, COXI	http://www.genecards.org/cgi-bin/carddisp.pl?gene=MT-CO1
MT-CO2	Mitochondrially Encoded Cytochrome C Oxidase II	COX2, MTCO2, COII, COXII	http://www.genecards.org/cgi-bin/carddisp.pl?gene=MT-CO2
MTA1	Metastasis Associated 1		http://www.genecards.org/cgi-bin/carddisp.pl?gene=MTA1
MTA3	Metastasis Associated 1 Family Member 3	KIAA1266	http://www.genecards.org/cgi-bin/carddisp.pl?gene=MTA3
MTAP	Methylthioadenosine Phosphorylase	MSAP, BDMF, DMSFH, DMSMFH, HEL-249, LGMBF, c86fus, MTAPase	http://www.genecards.org/cgi-bin/carddisp.pl?gene=MTAP
MTCH2	Mitochondrial Carrier 2	2310034D24Rik, HSPC032, SLC25A50, MIMP	http://www.genecards.org/cgi-bin/carddisp.pl?gene=MTCH2
MTFMT	Mitochondrial Methionyl-TRNA Formyltransferase	COXPD15, FMT1, FMT, MtFMT	http://www.genecards.org/cgi-bin/carddisp.pl?gene=MTFMT
MTMR1	Myotubularin Related Protein 1		http://www.genecards.org/cgi-bin/carddisp.pl?gene=MTMR1
MTRF1	Mitochondrial Translational Release Factor 1	MRF-1, MRF1, RF1, MTTRF1, mtRF-1	http://www.genecards.org/cgi-bin/carddisp.pl?gene=MTRF1
MYO10	Myosin X	myosin-X, KIAA0799	http://www.genecards.org/cgi-bin/carddisp.pl?gene=MYO10
MYO1D	Myosin ID	PPP1R108, myr4, KIAA0727	http://www.genecards.org/cgi-bin/carddisp.pl?gene=MYO1D
MYO5A	Myosin VA	myosin, myoxin, GS1, MYO5, MYR12, myosin-12, myosin-Va, MYH12	http://www.genecards.org/cgi-bin/carddisp.pl?gene=MYO5A
MZT1	Mitotic Spindle Organizing Protein 1	C13orf37, MOZART1	http://www.genecards.org/cgi-bin/carddisp.pl?gene=MZT1
N4BP1	NEDD4 Binding Protein 1	KIAA0615	http://www.genecards.org/cgi-bin/carddisp.pl?gene=N4BP1
NAA40	N(Alpha)-Acetyltransferase 40, NatD Catalytic Subunit	PATT1, NAT11	http://www.genecards.org/cgi-bin/carddisp.pl?gene=NAA40
NADSYN1	NAD Synthetase 1		http://www.genecards.org/cgi-bin/carddisp.pl?gene=NADSYN1
NAGLU	N-Acetyl-Alpha-Glucosaminidase	N-acetyl-alpha-glucosaminidase, CMT2V, MPS-IIIB, MPS3B, UFHSD, NAG, UFHSD1	http://www.genecards.org/cgi-bin/carddisp.pl?gene=NAGLU
NANP	N-Acetylneuraminic Acid Phosphatase	C20orf147, HDHD4, Neu5Ac-9-Pase, dJ694B14.3	http://www.genecards.org/cgi-bin/carddisp.pl?gene=NANP
NARS2	Asparaginyl-TRNA Synthetase 2, Mitochondrial (Putative)	ASNRS, SLM5, DFNB94	http://www.genecards.org/cgi-bin/carddisp.pl?gene=NARS2
NAXD	NAD(P)HX Dehydratase	LP3298, CARKD	http://www.genecards.org/cgi-bin/carddisp.pl?gene=NAXD
NCAPG2	Non-SMC Condensin II Complex Subunit G2	MTB, CAPG2, LUZP5, CAP-G2, hCAP-G2	http://www.genecards.org/cgi-bin/carddisp.pl?gene=NCAPG2
NCAPH2	Non-SMC Condensin II Complex Subunit H2	CTA-384D8.36, CAPH2, Kleisin-beta, hCAP-H2	http://www.genecards.org/cgi-bin/carddisp.pl?gene=NCAPH2
NCK2	NCK Adaptor Protein 2	NCKbeta, GRB4, Nck-2	http://www.genecards.org/cgi-bin/carddisp.pl?gene=NCK2
NCKAP5L	NCK Associated Protein 5 Like	KIAA1602, FP1193, Cep169, NCKAP5-like	http://www.genecards.org/cgi-bin/carddisp.pl?gene=NCKAP5L
NDUFA10	NADH:Ubiquinone Oxidoreductase Subunit A10	CI-42KD, CI-42k	http://www.genecards.org/cgi-bin/carddisp.pl?gene=NDUFA10
NDUFA13	NADH:Ubiquinone Oxidoreductase Subunit A13	B16.6, CDA016, CGI-39, CI-B16.6, GRIM-19, GRIM19	http://www.genecards.org/cgi-bin/carddisp.pl?gene=NDUFA13
NDUFA9	NADH:Ubiquinone Oxidoreductase Subunit A9	CC6, CI-39k, CI39k, SDR22E1, NDUFS2L, CI-39kD	http://www.genecards.org/cgi-bin/carddisp.pl?gene=NDUFA9
NDUFAB1	NADH:Ubiquinone Oxidoreductase Subunit AB1	mitochondrial, ACP, FASN2A, SDAP, CI-SDAP	http://www.genecards.org/cgi-bin/carddisp.pl?gene=NDUFAB1
NDUFAF3	NADH:Ubiquinone Oxidoreductase Complex Assembly Factor 3	2P1, E3-3, C3orf60	http://www.genecards.org/cgi-bin/carddisp.pl?gene=NDUFAF3
NDUFAF7	NADH:Ubiquinone Oxidoreductase Complex Assembly Factor 7	MidA, PRO1853, C2orf56	http://www.genecards.org/cgi-bin/carddisp.pl?gene=NDUFAF7
NDUFB1	NADH:Ubiquinone Oxidoreductase Subunit B1	MNLL, CI-MNLL, CI-SGDH	http://www.genecards.org/cgi-bin/carddisp.pl?gene=NDUFB1
NDUFB5	NADH:Ubiquinone Oxidoreductase Subunit B5	CISGDH, SGDH, CI-SGDH	http://www.genecards.org/cgi-bin/carddisp.pl?gene=NDUFB5
NDUFS3	NADH:Ubiquinone Oxidoreductase Core Subunit S3	mitochondrial, CI-30, CI-30kD	http://www.genecards.org/cgi-bin/carddisp.pl?gene=NDUFS3
NDUFS7	NADH:Ubiquinone Oxidoreductase Core Subunit S7	CI-20KD, MY017, PSST, mitochondrial, CI-20	http://www.genecards.org/cgi-bin/carddisp.pl?gene=NDUFS7
NELFCD	Negative Elongation Factor Complex Member C/D	HSPC130, NELF-C, NELF-D, TH1L, NELF-C/D, TH1, NELFD	http://www.genecards.org/cgi-bin/carddisp.pl?gene=NELFCD
NFS1	NFS1 Cysteine Desulfurase	HUSSY-08, IscS, NIFS	http://www.genecards.org/cgi-bin/carddisp.pl?gene=NFS1
NIPSNAP1	Nipsnap Homolog 1 (C. Elegans)	NipSnap1	http://www.genecards.org/cgi-bin/carddisp.pl?gene=NIPSNAP1
NIPSNAP3A	Nipsnap Homolog 3A	HSPC299, TASSC, NIPSNAP4, NipSnap3A	http://www.genecards.org/cgi-bin/carddisp.pl?gene=NIPSNAP3A
NKRF	NFKB Repressing Factor	ITBA4, NRF	http://www.genecards.org/cgi-bin/carddisp.pl?gene=NKRF
NLN	Neurolysin	MEP, neurolysin, EP24.16, MOP, AGTBP, KIAA1226	http://www.genecards.org/cgi-bin/carddisp.pl?gene=NLN
NOL11	Nucleolar Protein 11		http://www.genecards.org/cgi-bin/carddisp.pl?gene=NOL11
NOL7	Nucleolar Protein 7	RARG-1, dJ223E5.2, PQBP3, C6orf90, NOP27	http://www.genecards.org/cgi-bin/carddisp.pl?gene=NOL7
NOL9	Nucleolar Protein 9	Grc3, NET6	http://www.genecards.org/cgi-bin/carddisp.pl?gene=NOL9
NOMO3	Nodal Modulator 3	Nomo	http://www.genecards.org/cgi-bin/carddisp.pl?gene=NOMO3
NPEPL1	Aminopeptidase-Like 1	bA261P9.2, KIAA1974	http://www.genecards.org/cgi-bin/carddisp.pl?gene=NPEPL1
NPEPPS	Aminopeptidase Puromycin Sensitive	MP100, AAP-S, PSA	http://www.genecards.org/cgi-bin/carddisp.pl?gene=NPEPPS
NQO2	NAD(P)H Quinone Dehydrogenase 2	DHQV, DIA6, NMOR2, QR2	http://www.genecards.org/cgi-bin/carddisp.pl?gene=NQO2
NRBP1	Nuclear Receptor Binding Protein 1	MADM, MUDPNP, NRBP, BCON3	http://www.genecards.org/cgi-bin/carddisp.pl?gene=NRBP1
NRF1	Nuclear Respiratory Factor 1	ALPHA-PAL, NRF-1	http://www.genecards.org/cgi-bin/carddisp.pl?gene=NRF1
NSMAF	Neutral Sphingomyelinase Activation Associated Factor	FAN, GRAMD5	http://www.genecards.org/cgi-bin/carddisp.pl?gene=NSMAF
NT5C	5', 3'-Nucleotidase, Cytosolic	PN-II, DNT, HEL74, P5N2, PN-I, cdN, UMPH2, DNT1, dNT-1	http://www.genecards.org/cgi-bin/carddisp.pl?gene=NT5C
NT5DC1	5'-Nucleotidase Domain Containing 1	C6orf200, LP2642, NT5C2L1	http://www.genecards.org/cgi-bin/carddisp.pl?gene=NT5DC1
NT5DC2	5'-Nucleotidase Domain Containing 2		http://www.genecards.org/cgi-bin/carddisp.pl?gene=NT5DC2
NT5DC3	5'-Nucleotidase Domain Containing 3	TU12B1TY, TU12B1-TY, GNN	http://www.genecards.org/cgi-bin/carddisp.pl?gene=NT5DC3
NUDT1	Nudix Hydrolase 1	8-oxo-dGTPase, MTH1	http://www.genecards.org/cgi-bin/carddisp.pl?gene=NUDT1
NUDT14	Nudix Hydrolase 14	UGPP, UGPPase	http://www.genecards.org/cgi-bin/carddisp.pl?gene=NUDT14
NUDT2	Nudix Hydrolase 2	Ap4Aase, APAH1	http://www.genecards.org/cgi-bin/carddisp.pl?gene=NUDT2
NUMBL	NUMB Like, Endocytic Adaptor Protein	CAG3A, TNRC23, NUMBR, NUMBLIKE, NUMB-R, NBL, CTG3a	http://www.genecards.org/cgi-bin/carddisp.pl?gene=NUMBL
NUP160	Nucleoporin 160kDa	KIAA0197, NUP120	http://www.genecards.org/cgi-bin/carddisp.pl?gene=NUP160
NUP93	Nucleoporin 93kDa	NIC96, NPHS12, KIAA0095	http://www.genecards.org/cgi-bin/carddisp.pl?gene=NUP93
NUTF2	Nuclear Transport Factor 2	NTF-2, NTF2, PP15	http://www.genecards.org/cgi-bin/carddisp.pl?gene=NUTF2
NXN	Nucleoredoxin	nucleoredoxin, TRG-4, NRX	http://www.genecards.org/cgi-bin/carddisp.pl?gene=NXN
OAT	Ornithine Aminotransferase	GACR, HOGA, OATASE, OKT	http://www.genecards.org/cgi-bin/carddisp.pl?gene=OAT
OBSL1	Obscurin-Like 1	KIAA0657	http://www.genecards.org/cgi-bin/carddisp.pl?gene=OBSL1
OGDH	Oxoglutarate Dehydrogenase	AKGDH, OGDC-E1, E1k, OGDC	http://www.genecards.org/cgi-bin/carddisp.pl?gene=OGDH
OPA1	OPA1, Mitochondrial Dynamin Like GTPase	mitochondrial, MGM1, MTDPS14, NPG, NTG, largeG, KIAA0567, BERHS	http://www.genecards.org/cgi-bin/carddisp.pl?gene=OPA1
OSBPL1A	Oxysterol Binding Protein Like 1A	OSBPL1, OSBPL1B, ORP-1, ORP1, OSBP8	http://www.genecards.org/cgi-bin/carddisp.pl?gene=OSBPL1A
OSBPL8	Oxysterol Binding Protein Like 8	MST120, MSTP120, ORP8, OSBP10, KIAA1451, ORP-8	http://www.genecards.org/cgi-bin/carddisp.pl?gene=OSBPL8
OXA1L	Oxidase (Cytochrome C) Assembly 1-Like	OXA1, hsa, OXA1Hs	http://www.genecards.org/cgi-bin/carddisp.pl?gene=OXA1L
OXNAD1	Oxidoreductase NAD Binding Domain Containing 1		http://www.genecards.org/cgi-bin/carddisp.pl?gene=OXNAD1
PAICS	Phosphoribosylaminoimidazole Carboxylase; Phosphoribosylaminoimidazolesuccinocarboxamide Synthase	ADE2, AIRC, PAIS, ADE2H1	http://www.genecards.org/cgi-bin/carddisp.pl?gene=PAICS
PAIP2	Poly(A) Binding Protein Interacting Protein 2	PAIP-2, PAIP2A	http://www.genecards.org/cgi-bin/carddisp.pl?gene=PAIP2
PARD3	Par-3 Family Cell Polarity Regulator	PAR-3, PAR3, Baz, PAR3alpha, PARD3A, PPP1R118, SE2-5L16, SE2-5LT1, SE2-5T2, bazooka, ASIP, PAR3-alpha, PARD-3, PAR3A	http://www.genecards.org/cgi-bin/carddisp.pl?gene=PARD3
PARN	Poly(A)-Specific Ribonuclease	DAN, PFBMFT4, DKCB6	http://www.genecards.org/cgi-bin/carddisp.pl?gene=PARN
PARP1	Poly(ADP-Ribose) Polymerase 1	PARP, ADPRT1, pADPRT-1, poly(ADP-ribosyl)transferase, ADPRT, PPOL, ARTD1, PARP-1	http://www.genecards.org/cgi-bin/carddisp.pl?gene=PARP1
PBXIP1	Pre-B-Cell Leukemia Homeobox Interacting Protein 1	HPIP	http://www.genecards.org/cgi-bin/carddisp.pl?gene=PBXIP1
PCBP2	Poly(RC) Binding Protein 2	alpha-CP2, hnRNP-E2, HNRPE2, HNRNPE2	http://www.genecards.org/cgi-bin/carddisp.pl?gene=PCBP2
PCID2	PCI Domain Containing 2	F10	http://www.genecards.org/cgi-bin/carddisp.pl?gene=PCID2
PCYOX1	Prenylcysteine Oxidase 1	PCL1, KIAA0908	http://www.genecards.org/cgi-bin/carddisp.pl?gene=PCYOX1
PDK1	Pyruvate Dehydrogenase Kinase 1	PDHK1	http://www.genecards.org/cgi-bin/carddisp.pl?gene=PDK1
PDK3	Pyruvate Dehydrogenase Kinase 3	CMTX6, PDHK3, GS1-358P8.4	http://www.genecards.org/cgi-bin/carddisp.pl?gene=PDK3
PECR	Peroxisomal Trans-2-Enoyl-CoA Reductase	HSA250303, PVIARL, DCR-RP, SDR29C1, TERP, pVI-ARL, DCRRP, HPDHASE	http://www.genecards.org/cgi-bin/carddisp.pl?gene=PECR
PEX1	Peroxisomal Biogenesis Factor 1	HMLR1, PBD1A, PBD1B, peroxin-1, ZWS, ZWS1	http://www.genecards.org/cgi-bin/carddisp.pl?gene=PEX1
PFKFB2	6-Phosphofructo-2-Kinase/Fructose-2,6-Biphosphatase 2	PFK-2/FBPase-2	http://www.genecards.org/cgi-bin/carddisp.pl?gene=PFKFB2
PFKM	Phosphofructokinase, Muscle	phosphohexokinase, ATP-PFK, 6-phosphofructo-1-kinase, GSD7, PFK-1, PFK1, PFKA, PPP1R122, phosphofructokinase-M, PFKX, PFK-A, PFK-M	http://www.genecards.org/cgi-bin/carddisp.pl?gene=PFKM
PGM1	Phosphoglucomutase 1	CDG1T, GSD14	http://www.genecards.org/cgi-bin/carddisp.pl?gene=PGM1
PGM2	Phosphoglucomutase 2	phosphopentomutase, MSTP006, phosphodeoxyribomutase	http://www.genecards.org/cgi-bin/carddisp.pl?gene=PGM2
PHC3	Polyhomeotic Homolog 3	HPH3, EDR3, PH3	http://www.genecards.org/cgi-bin/carddisp.pl?gene=PHC3
PI4KA	Phosphatidylinositol 4-Kinase Alpha	PI4K-ALPHA, PMGYCHA, pi4K230, PIK4CA, PIK4	http://www.genecards.org/cgi-bin/carddisp.pl?gene=PI4KA
PIGK	Phosphatidylinositol Glycan Anchor Biosynthesis Class K	GPI8, PIG-K, hGPI8	http://www.genecards.org/cgi-bin/carddisp.pl?gene=PIGK
PIGS	Phosphatidylinositol Glycan Anchor Biosynthesis Class S		http://www.genecards.org/cgi-bin/carddisp.pl?gene=PIGS
PIGT	Phosphatidylinositol Glycan Anchor Biosynthesis Class T	PNH2, NDAP, MCAHS3, CGI-06	http://www.genecards.org/cgi-bin/carddisp.pl?gene=PIGT
PIGU	Phosphatidylinositol Glycan Anchor Biosynthesis Class U	GAB1, CDC91L1	http://www.genecards.org/cgi-bin/carddisp.pl?gene=PIGU
PIK3C2A	Phosphatidylinositol-4-Phosphate 3-Kinase Catalytic Subunit Type 2 Alpha	CPK, PI3-K-C2(ALPHA), PI3-K-C2A, PI3K-C2alpha, PI3K-C2-alpha	http://www.genecards.org/cgi-bin/carddisp.pl?gene=PIK3C2A
PIK3CD	Phosphatidylinositol-4,5-Bisphosphate 3-Kinase Catalytic Subunit Delta	P110DELTA, IMD14, p110D, PI3Kdelta, PI3K-delta, APDS, catalytic, PI3K	http://www.genecards.org/cgi-bin/carddisp.pl?gene=PIK3CD
PIR	Pirin	pirin	http://www.genecards.org/cgi-bin/carddisp.pl?gene=PIR
PLCB4	Phospholipase C Beta 4	ARCND2, PLC-beta-4, PI-PLC, 1-phosphatidyl-D-myo-inositol-4,5-bisphosphate, inositoltrisphosphohydrolase	http://www.genecards.org/cgi-bin/carddisp.pl?gene=PLCB4
PLCG1	Phospholipase C Gamma 1	1-phosphatidyl-D-myo-inositol-4,5-bisphosphate, inositoltrisphosphohydrolase, NCKAP3, PLC148, PLCgamma1, PLC1, PLC-148, PLC-II, PLC-gamma-1	http://www.genecards.org/cgi-bin/carddisp.pl?gene=PLCG1
PLOD1	Procollagen-Lysine,2-Oxoglutarate 5-Dioxygenase 1	EDS6, LH, LLH, PLOD, LH1	http://www.genecards.org/cgi-bin/carddisp.pl?gene=PLOD1
PLOD3	Procollagen-Lysine,2-Oxoglutarate 5-Dioxygenase 3	LH3	http://www.genecards.org/cgi-bin/carddisp.pl?gene=PLOD3
PM20D2	Peptidase M20 Domain Containing 2	bA63L7.3, ACY1L2	http://www.genecards.org/cgi-bin/carddisp.pl?gene=PM20D2
PMEL	Premelanosome Protein	P1, p100, ME20, SI, gp100, SIL, SILV, D12S53E, ME20-M, ME20M, PMEL17	http://www.genecards.org/cgi-bin/carddisp.pl?gene=PMEL
PMFBP1	Polyamine Modulated Factor 1 Binding Protein 1		http://www.genecards.org/cgi-bin/carddisp.pl?gene=PMFBP1
PNKP	Polynucleotide Kinase 3'-Phosphatase	PNK, AOA4, EIEE10, MCSZ	http://www.genecards.org/cgi-bin/carddisp.pl?gene=PNKP
POGK	Pogo Transposable Element With KRAB Domain	BASS2, KRBOX2, LST003, KIAA1513	http://www.genecards.org/cgi-bin/carddisp.pl?gene=POGK
POLD1	Polymerase (DNA) Delta 1, Catalytic Subunit	CRCS10, MDPL, POLD, CDC2	http://www.genecards.org/cgi-bin/carddisp.pl?gene=POLD1
POLDIP2	Polymerase (DNA) Delta Interacting Protein 2	p38, PDIP38, POLD4	http://www.genecards.org/cgi-bin/carddisp.pl?gene=POLDIP2
POLE4	Polymerase (DNA) Epsilon 4, Accessory Subunit	p12, YHHQ1	http://www.genecards.org/cgi-bin/carddisp.pl?gene=POLE4
POLR2G	Polymerase (RNA) II Subunit G	hRPB19, hsRPB7, RPB19, RPB7	http://www.genecards.org/cgi-bin/carddisp.pl?gene=POLR2G
POLR2H	Polymerase (RNA) II Subunit H	RPB17, RPABC3, RPB8, hRPB8	http://www.genecards.org/cgi-bin/carddisp.pl?gene=POLR2H
POLR3A	Polymerase (RNA) III Subunit A	RPC155, ADDH, HLD7, RPC1, hRPC155	http://www.genecards.org/cgi-bin/carddisp.pl?gene=POLR3A
POMP	Proteasome Maturation Protein	2510048O06Rik, HSPC014, PNAS-110, proteassemblin, C13orf12, UMP1, hUMP1	http://www.genecards.org/cgi-bin/carddisp.pl?gene=POMP
PPA2	Pyrophosphatase (Inorganic) 2	HSPC124, SID6-306	http://www.genecards.org/cgi-bin/carddisp.pl?gene=PPA2
PPCDC	Phosphopantothenoylcysteine Decarboxylase	MDS018, coaC, PPC-DC	http://www.genecards.org/cgi-bin/carddisp.pl?gene=PPCDC
PPCS	Phosphopantothenoylcysteine Synthetase	COAB	http://www.genecards.org/cgi-bin/carddisp.pl?gene=PPCS
PPFIBP2	PPFIA Binding Protein 2	Cclp1	http://www.genecards.org/cgi-bin/carddisp.pl?gene=PPFIBP2
PPIP5K2	Diphosphoinositol Pentakisphosphate Kinase 2	CFAP160, IP7K2, HISPPD1, VIP2, KIAA0433, hsVIP2	http://www.genecards.org/cgi-bin/carddisp.pl?gene=PPIP5K2
PPM1H	Protein Phosphatase, Mg2+/Mn2+ Dependent 1H	NERPP-2C, ARHCL1, URCC2, KIAA1157	http://www.genecards.org/cgi-bin/carddisp.pl?gene=PPM1H
PPP1R3D	Protein Phosphatase 1 Regulatory Subunit 3D	PPP1R6	http://www.genecards.org/cgi-bin/carddisp.pl?gene=PPP1R3D
PPP2R1B	Protein Phosphatase 2 Regulatory Subunit A, Beta	PP2A-A-beta, PP2A-Abeta, PR65B	http://www.genecards.org/cgi-bin/carddisp.pl?gene=PPP2R1B
PPP4C	Protein Phosphatase 4 Catalytic Subunit	PP4, PPH3, PP-X, PP4C, PPP4, PPX	http://www.genecards.org/cgi-bin/carddisp.pl?gene=PPP4C
PPP6C	Protein Phosphatase 6 Catalytic Subunit	PP6, PP6C, PPP6	http://www.genecards.org/cgi-bin/carddisp.pl?gene=PPP6C
PRAME	Preferentially Expressed Antigen In Melanoma	CT130, MAPE, OIP-4, OIP4	http://www.genecards.org/cgi-bin/carddisp.pl?gene=PRAME
PRC1	Protein Regulator Of Cytokinesis 1	ASE1	http://www.genecards.org/cgi-bin/carddisp.pl?gene=PRC1
PRCP	Prolylcarboxypeptidase	PCP, prolylcarboxypeptidase, HUMPCP	http://www.genecards.org/cgi-bin/carddisp.pl?gene=PRCP
PRDX2	Peroxiredoxin 2	PRP, TPX1, PTX1, torin, HEL-S-2a, PRX2, PRXII, TDPX1, NKEF-B, NKEFB, TSA	http://www.genecards.org/cgi-bin/carddisp.pl?gene=PRDX2
PRDX6	Peroxiredoxin 6	1-Cys, HEL-S-128m, PRX, p29, AOP2, NSGPx, aiPLA2, KIAA0106	http://www.genecards.org/cgi-bin/carddisp.pl?gene=PRDX6
PREPL	Prolyl Endopeptidase-Like	KIAA0436, Prolylendopeptidase-like	http://www.genecards.org/cgi-bin/carddisp.pl?gene=PREPL
PREX1	Phosphatidylinositol-3,4,5-Trisphosphate Dependent Rac Exchange Factor 1	P-REX1, KIAA1415	http://www.genecards.org/cgi-bin/carddisp.pl?gene=PREX1
PRIM1	Primase (DNA) Subunit 1	p49	http://www.genecards.org/cgi-bin/carddisp.pl?gene=PRIM1
PRKACB	Protein Kinase CAMP-Activated Catalytic Subunit Beta	PKACB	http://www.genecards.org/cgi-bin/carddisp.pl?gene=PRKACB
PRKD1	Protein Kinase D1	nPKC-D1, nPKC-mu, PKC-MU, PKCM, PRKCM, PKD, PKD1	http://www.genecards.org/cgi-bin/carddisp.pl?gene=PRKD1
PRMT1	Protein Arginine Methyltransferase 1	HCP1, ANM1, HRMT1L2, IR1B4, HMT2	http://www.genecards.org/cgi-bin/carddisp.pl?gene=PRMT1
PRMT3	Protein Arginine Methyltransferase 3	HRMT1L3	http://www.genecards.org/cgi-bin/carddisp.pl?gene=PRMT3
PRMT5	Protein Arginine Methyltransferase 5	HRMT1L5, SKB1, IBP72, JBP1, SKB1Hs	http://www.genecards.org/cgi-bin/carddisp.pl?gene=PRMT5
PRPF18	Pre-MRNA Processing Factor 18	hPrp18, PRP18	http://www.genecards.org/cgi-bin/carddisp.pl?gene=PRPF18
PRPS2	Phosphoribosyl Pyrophosphate Synthetase 2	PPRibP, PRSII, PRS-II	http://www.genecards.org/cgi-bin/carddisp.pl?gene=PRPS2
PRPSAP2	Phosphoribosyl Pyrophosphate Synthetase Associated Protein 2	PAP41	http://www.genecards.org/cgi-bin/carddisp.pl?gene=PRPSAP2
PRRC2B	Proline Rich Coiled-Coil 2B	KIAA0515, LQFBS-1, BAT2L, BAT2L1	http://www.genecards.org/cgi-bin/carddisp.pl?gene=PRRC2B
PSAP	Prosaposin	SAP1, prosaposin, GLBA	http://www.genecards.org/cgi-bin/carddisp.pl?gene=PSAP
PSEN2	Presenilin 2	PS2, STM-2, STM2, PSNL2, AD5, AD3LP, E5-1, PS-2, AD4, AD3L, CMD1V	http://www.genecards.org/cgi-bin/carddisp.pl?gene=PSEN2
PSMB5	Proteasome Subunit Beta 5	MB1, LMPX, X	http://www.genecards.org/cgi-bin/carddisp.pl?gene=PSMB5
PSMB6	Proteasome Subunit Beta 6	Delta, LMPY, Y	http://www.genecards.org/cgi-bin/carddisp.pl?gene=PSMB6
PSMD8	Proteasome 26S Subunit, Non-ATPase 8	S14, Rpn12, Nin1p, HIP6, HEL-S-91n, P31, HYPF	http://www.genecards.org/cgi-bin/carddisp.pl?gene=PSMD8
PSME4	Proteasome Activator Subunit 4	PA200, KIAA0077	http://www.genecards.org/cgi-bin/carddisp.pl?gene=PSME4
PSMG3	Proteasome Assembly Chaperone 3	C7orf48, PAC-3, PAC3, hPAC3	http://www.genecards.org/cgi-bin/carddisp.pl?gene=PSMG3
PSPC1	Paraspeckle Component 1	PSP1	http://www.genecards.org/cgi-bin/carddisp.pl?gene=PSPC1
PTBP3	Polypyrimidine Tract Binding Protein 3	ROD1	http://www.genecards.org/cgi-bin/carddisp.pl?gene=PTBP3
PTGFRN	Prostaglandin F2 Receptor Inhibitor	CD315, SMAP-6, CD9P-1, EWI-F, FPRP, KIAA1436, CD9P1, EWIF	http://www.genecards.org/cgi-bin/carddisp.pl?gene=PTGFRN
PTP4A2	Protein Tyrosine Phosphatase Type IVA, Member 2	HH13, HH7-2, ptp-IV1a, ptp-IV1b, PTP4A, HU-PP-1, OV-1, PRL-2, PRL2, PTP(CAAXII), PTPCAAX2	http://www.genecards.org/cgi-bin/carddisp.pl?gene=PTP4A2
PTPMT1	Protein Tyrosine Phosphatase, Mitochondrial 1	MOSP, PLIP, DUSP23, PNAS-129	http://www.genecards.org/cgi-bin/carddisp.pl?gene=PTPMT1
PTPN1	Protein Tyrosine Phosphatase, Non-Receptor Type 1	PTP1B, PTP-1B	http://www.genecards.org/cgi-bin/carddisp.pl?gene=PTPN1
PTPN14	Protein Tyrosine Phosphatase, Non-Receptor Type 14	PTP36, PEZ, PTPD2	http://www.genecards.org/cgi-bin/carddisp.pl?gene=PTPN14
PTPRF	Protein Tyrosine Phosphatase, Receptor Type F	BNAH2, LCA-homolog, LAR	http://www.genecards.org/cgi-bin/carddisp.pl?gene=PTPRF
PTRH1	Peptidyl-TRNA Hydrolase 1 Homolog	PTH1, C9orf115, PTH	http://www.genecards.org/cgi-bin/carddisp.pl?gene=PTRH1
PUM3	Pumilio RNA Binding Family Member 3	KIAA0020, HA-8, PEN, PUF6, HLA-HA8, PUF-A, XTP5	http://www.genecards.org/cgi-bin/carddisp.pl?gene=PUM3
PUS7	Pseudouridylate Synthase 7 (Putative)	KIAA1897	http://www.genecards.org/cgi-bin/carddisp.pl?gene=PUS7
PYCARD	PYD And CARD Domain Containing	TMS1, CARD5, ASC, TMS-1, TMS, hASC	http://www.genecards.org/cgi-bin/carddisp.pl?gene=PYCARD
PYGL	Phosphorylase, Glycogen, Liver	GSD6	http://www.genecards.org/cgi-bin/carddisp.pl?gene=PYGL
PYURF	PIGY Upstream Reading Frame	PREY	http://www.genecards.org/cgi-bin/carddisp.pl?gene=PYURF
QDPR	Quinoid Dihydropteridine Reductase	PKU2, DHPR, HDHPR, SDR33C1	http://www.genecards.org/cgi-bin/carddisp.pl?gene=QDPR
QPCT	Glutaminyl-Peptide Cyclotransferase	GCT, EC, QC, sQC	http://www.genecards.org/cgi-bin/carddisp.pl?gene=QPCT
QPRT	Quinolinate Phosphoribosyltransferase	HEL-S-90n, QPRTase, QAPRTase	http://www.genecards.org/cgi-bin/carddisp.pl?gene=QPRT
QRICH1	Glutamine Rich 1		http://www.genecards.org/cgi-bin/carddisp.pl?gene=QRICH1
QTRT2	Queuine TRNA-Ribosyltransferase Accessory Subunit 2	QTRTD1	http://www.genecards.org/cgi-bin/carddisp.pl?gene=QTRT2
RAB1B	RAB1B, Member RAS Oncogene Family		http://www.genecards.org/cgi-bin/carddisp.pl?gene=RAB1B
RAB27A	RAB27A, Member RAS Oncogene Family	RAM, GS2, HsT18676, rab-27, RAB27	http://www.genecards.org/cgi-bin/carddisp.pl?gene=RAB27A
RAB32	RAB32, Member RAS Oncogene Family		http://www.genecards.org/cgi-bin/carddisp.pl?gene=RAB32
RAB38	RAB38, Member RAS Oncogene Family	NY-MEL-1, rrGTPbp	http://www.genecards.org/cgi-bin/carddisp.pl?gene=RAB38
RAB5A	RAB5A, Member RAS Oncogene Family	RAB5	http://www.genecards.org/cgi-bin/carddisp.pl?gene=RAB5A
RAB5C	RAB5C, Member RAS Oncogene Family	RAB, RAB5C, RAB5CL, RABL, L1880, RAB5L	http://www.genecards.org/cgi-bin/carddisp.pl?gene=RAB5C
RAB6A	RAB6A, Member RAS Oncogene Family	RAB6, Rab-6	http://www.genecards.org/cgi-bin/carddisp.pl?gene=RAB6A
RABGGTA	Rab Geranylgeranyltransferase Alpha Subunit	PTAR3	http://www.genecards.org/cgi-bin/carddisp.pl?gene=RABGGTA
RALB	V-Ral Simian Leukemia Viral Oncogene Homolog B		http://www.genecards.org/cgi-bin/carddisp.pl?gene=RALB
RAP1GDS1	Rap1 GTPase-GDP Dissociation Stimulator 1	GDS1, SmgGDS	http://www.genecards.org/cgi-bin/carddisp.pl?gene=RAP1GDS1
RASA3	RAS P21 Protein Activator 3	GAP1IP4BP, GAPIII, GAP1(IP4BP)	http://www.genecards.org/cgi-bin/carddisp.pl?gene=RASA3
RBBP7	Retinoblastoma Binding Protein 7	RbAp46, RBBP-7	http://www.genecards.org/cgi-bin/carddisp.pl?gene=RBBP7
RBBP9	Retinoblastoma Binding Protein 9	BOG, RBBP-10, RBBP-9, RBBP10	http://www.genecards.org/cgi-bin/carddisp.pl?gene=RBBP9
RBFA	Ribosome Binding Factor A (Putative)	C18orf22, HsT169	http://www.genecards.org/cgi-bin/carddisp.pl?gene=RBFA
RCC2	Regulator Of Chromosome Condensation 2	TD-60, KIAA1470, TD60	http://www.genecards.org/cgi-bin/carddisp.pl?gene=RCC2
RCN2	Reticulocalbin 2	55kD), ERC-55, TCBP49, E6BP, ERC55	http://www.genecards.org/cgi-bin/carddisp.pl?gene=RCN2
RDH11	Retinol Dehydrogenase 11 (All-Trans/9-Cis/11-Cis)	CGI82, HCBP12, MDT1, RALR1, RDJCSS, SCALD, ARSDR1, PSDR1, SDR7C1	http://www.genecards.org/cgi-bin/carddisp.pl?gene=RDH11
RELL1	RELT Like 1	tmp_locus_29	http://www.genecards.org/cgi-bin/carddisp.pl?gene=RELL1
RER1	Retention In Endoplasmic Reticulum Sorting Receptor 1		http://www.genecards.org/cgi-bin/carddisp.pl?gene=RER1
RETSAT	Retinol Saturase (All-Trans-Retinol 13,14-Reductase)	PPSIG, RetSat	http://www.genecards.org/cgi-bin/carddisp.pl?gene=RETSAT
RFC3	Replication Factor C Subunit 3	RFC, RFC38	http://www.genecards.org/cgi-bin/carddisp.pl?gene=RFC3
RHEB	Ras Homolog Enriched In Brain	RHEB2	http://www.genecards.org/cgi-bin/carddisp.pl?gene=RHEB
RLBP1	Retinaldehyde Binding Protein 1	CRALBP	http://www.genecards.org/cgi-bin/carddisp.pl?gene=RLBP1
RMDN2	Regulator Of Microtubule Dynamics 2	BLOCK18, PRO34163, PYST9371, RMD2, RMD4, FAM82A, FAM82A1, RMD-2, hRMD-2	http://www.genecards.org/cgi-bin/carddisp.pl?gene=RMDN2
RMND1	Required For Meiotic Nuclear Division 1 Homolog	RMD1, COXPD11, bA351K16, bA351K16.3, C6orf96	http://www.genecards.org/cgi-bin/carddisp.pl?gene=RMND1
RMND5A	Required For Meiotic Nuclear Division 5 Homolog A	CTLH, GID2, GID2A, RMD5, p44CTLH	http://www.genecards.org/cgi-bin/carddisp.pl?gene=RMND5A
RNASEH2B	Ribonuclease H2 Subunit B	AGS2, DLEU8	http://www.genecards.org/cgi-bin/carddisp.pl?gene=RNASEH2B
RNASET2	Ribonuclease T2	bA514O12.3, RNASE6PL	http://www.genecards.org/cgi-bin/carddisp.pl?gene=RNASET2
RNF2	Ring Finger Protein 2	RING2, BAP-1, BAP1, DING, HIPI3, RING1B	http://www.genecards.org/cgi-bin/carddisp.pl?gene=RNF2
RNPEP	Arginyl Aminopeptidase	AP-B, APB	http://www.genecards.org/cgi-bin/carddisp.pl?gene=RNPEP
RPN2	Ribophorin II	RPNII, SWP1, ribophorin-2, RIBIIR, RPN-II	http://www.genecards.org/cgi-bin/carddisp.pl?gene=RPN2
RPS6KA5	Ribosomal Protein S6 Kinase A5	MSPK1, RLPK, MSK1, RSKL, S6K-alpha-5	http://www.genecards.org/cgi-bin/carddisp.pl?gene=RPS6KA5
RREB1	Ras Responsive Element Binding Protein 1	LZ321, FINB, RREB-1, Zep-1, HNT	http://www.genecards.org/cgi-bin/carddisp.pl?gene=RREB1
RRM1	Ribonucleotide Reductase Catalytic Subunit M1	R1, RIR1, RR1	http://www.genecards.org/cgi-bin/carddisp.pl?gene=RRM1
RRM2	Ribonucleotide Reductase Regulatory Subunit M2	R2, RR2M, RR2	http://www.genecards.org/cgi-bin/carddisp.pl?gene=RRM2
RTKN	Rhotekin	rhotekin, RTKN1	http://www.genecards.org/cgi-bin/carddisp.pl?gene=RTKN
RTN3	Reticulon 3	HAP, RTN3-A1, ASYIP, NSPL2, NSPLII	http://www.genecards.org/cgi-bin/carddisp.pl?gene=RTN3
RUBCN	RUN And Cysteine Rich Domain Containing Beclin 1 Interacting Protein	KIAA0226, RUBICON, SCAR15, baron, rundataxin	http://www.genecards.org/cgi-bin/carddisp.pl?gene=RUBCN
RWDD1	RWD Domain Containing 1	CGI-24, PTD013, DFRP2	http://www.genecards.org/cgi-bin/carddisp.pl?gene=RWDD1
RWDD4	RWD Domain Containing 4	FAM28A, RWDD4A	http://www.genecards.org/cgi-bin/carddisp.pl?gene=RWDD4
S100A1	S100 Calcium Binding Protein A1	S100, S100-alpha, S100A	http://www.genecards.org/cgi-bin/carddisp.pl?gene=S100A1
S100B	S100 Calcium Binding Protein B	S100, NEF, S100-B, S100beta	http://www.genecards.org/cgi-bin/carddisp.pl?gene=S100B
SAC3D1	SAC3 Domain Containing 1	HSU79266, SHD1	http://www.genecards.org/cgi-bin/carddisp.pl?gene=SAC3D1
SAMM50	SAMM50 Sorting And Assembly Machinery Component	TOB55, CGI-51, OMP85, YNL026W, SAM50, TRG-3	http://www.genecards.org/cgi-bin/carddisp.pl?gene=SAMM50
SBF1	SET Binding Factor 1	Sbf1, MTMR5, CMT4B3, DENND7A	http://www.genecards.org/cgi-bin/carddisp.pl?gene=SBF1
SCARB2	Scavenger Receptor Class B Member 2	AMRF, EPM4, HLGP85, LIMP-2, SR-BII, CD36L2, LGP85, LIMPII, LIMP2	http://www.genecards.org/cgi-bin/carddisp.pl?gene=SCARB2
SCD	Stearoyl-CoA Desaturase (Delta-9-Desaturase)	FADS5, MSTP008, SCD1, delta(9)-desaturase, SCDOS, hSCD1, delta-9-desaturase	http://www.genecards.org/cgi-bin/carddisp.pl?gene=SCD
SCFD2	Sec1 Family Domain Containing 2	STXBP1L1	http://www.genecards.org/cgi-bin/carddisp.pl?gene=SCFD2
SCOC	Short Coiled-Coil Protein	HRIHFB2072, UNC-69, SCOCO	http://www.genecards.org/cgi-bin/carddisp.pl?gene=SCOC
SCRN2	Secernin 2	Ses2	http://www.genecards.org/cgi-bin/carddisp.pl?gene=SCRN2
SDCBP	Syndecan Binding Protein	ST1, MDA-9, syntenin, syntenin-1, MDA9, SYCL, TACIP18	http://www.genecards.org/cgi-bin/carddisp.pl?gene=SDCBP
SDHA	Succinate Dehydrogenase Complex Flavoprotein Subunit A	FP, CMD1GG, PGL5, SDH1, SDH2, SDHF	http://www.genecards.org/cgi-bin/carddisp.pl?gene=SDHA
SEC11C	SEC11 Homolog C, Signal Peptidase Complex Subunit	SEC11L3, SPC21, SPCS4C	http://www.genecards.org/cgi-bin/carddisp.pl?gene=SEC11C
SEH1L	SEH1 Like Nucleoporin	SEH1A, SEH1B, Seh1, SEC13L	http://www.genecards.org/cgi-bin/carddisp.pl?gene=SEH1L
SEPHS2	Selenophosphate Synthetase 2	SPS2b, SPS2	http://www.genecards.org/cgi-bin/carddisp.pl?gene=SEPHS2
SEPN1	Selenoprotein N, 1	CFTD, RSS, MDRS1, RSMD1, SELN	http://www.genecards.org/cgi-bin/carddisp.pl?gene=SEPN1
SGSH	N-Sulfoglucosamine Sulfohydrolase	HSS, sulfamidase, MPS3A, SFMD, sulphamidase	http://www.genecards.org/cgi-bin/carddisp.pl?gene=SGSH
SH3BP4	SH3 Domain Binding Protein 4	BOG25, TTP, EHB10	http://www.genecards.org/cgi-bin/carddisp.pl?gene=SH3BP4
SIGMAR1	Sigma Non-Opioid Intracellular Receptor 1	ALS16, DSMA2, SR-BP1, sigma1R, OPRS1, SIG-1R, SR-BP, SRBP, hSigmaR1, Sigma1-receptor	http://www.genecards.org/cgi-bin/carddisp.pl?gene=SIGMAR1
SIRT3	Sirtuin 3	SIR2L3, hSIRT3	http://www.genecards.org/cgi-bin/carddisp.pl?gene=SIRT3
SLC24A5	Solute Carrier Family 24 Member 5	OCA6, SHEP4, JSX, NCKX5	http://www.genecards.org/cgi-bin/carddisp.pl?gene=SLC24A5
SLC25A1	Solute Carrier Family 25 Member 1	D2L2AD, SEA, SLC20A3, CTP	http://www.genecards.org/cgi-bin/carddisp.pl?gene=SLC25A1
SLC25A12	Solute Carrier Family 25 Member 12	AGC1, ARALAR, ARALAR1	http://www.genecards.org/cgi-bin/carddisp.pl?gene=SLC25A12
SLC25A13	Solute Carrier Family 25 Member 13	CITRIN, CTLN2, ARALAR2	http://www.genecards.org/cgi-bin/carddisp.pl?gene=SLC25A13
SLC25A3	Solute Carrier Family 25 Member 3	OK/SW-cl.48, PHC, PTP	http://www.genecards.org/cgi-bin/carddisp.pl?gene=SLC25A3
SLC26A2	Solute Carrier Family 26 Member 2	DTD, EDM4, D5S1708, MST153, MSTP157, DTDST	http://www.genecards.org/cgi-bin/carddisp.pl?gene=SLC26A2
SLC27A3	Solute Carrier Family 27 Member 3	ACSVL3, FATP3, VLCS-3, FATP-3	http://www.genecards.org/cgi-bin/carddisp.pl?gene=SLC27A3
SLC2A1	Solute Carrier Family 2 Member 1	DYT17, DYT18, EIG12, GLUT1DS, SDCHCN, CSE, PED, DYT9, HTLVR, GLUT1, GLUT-1, GLUT	http://www.genecards.org/cgi-bin/carddisp.pl?gene=SLC2A1
SLC39A10	Solute Carrier Family 39 Member 10	LZT-Hs2, ZIP-10, KIAA1265, ZIP10	http://www.genecards.org/cgi-bin/carddisp.pl?gene=SLC39A10
SLC39A7	Solute Carrier Family 39 Member 7	RING5, D6S115E, D6S2244E, H2-KE4, KE4, HKE4, ZIP7	http://www.genecards.org/cgi-bin/carddisp.pl?gene=SLC39A7
SMIM8	Small Integral Membrane Protein 8	dJ102H19.2, C6orf162	http://www.genecards.org/cgi-bin/carddisp.pl?gene=SMIM8
SMS	Spermine Synthase	SPS, SRS, MRSR, SPMSY	http://www.genecards.org/cgi-bin/carddisp.pl?gene=SMS
SNRPG	Small Nuclear Ribonucleoprotein Polypeptide G	SMG, Sm-G, snRNP-G, PBSCG	http://www.genecards.org/cgi-bin/carddisp.pl?gene=SNRPG
SNRPN	Small Nuclear Ribonucleoprotein Polypeptide N	SMN, RT-LI, SM-D, SNRNP-N, SNURF-SNRPN, sm-N, HCERN3, PWCR	http://www.genecards.org/cgi-bin/carddisp.pl?gene=SNRPN
SNX25	Sorting Nexin 25	SBBI31, MSTP043	http://www.genecards.org/cgi-bin/carddisp.pl?gene=SNX25
SNX3	Sorting Nexin 3	Grd19, MCOPS8, SDP3	http://www.genecards.org/cgi-bin/carddisp.pl?gene=SNX3
SNX8	Sorting Nexin 8	Mvp1	http://www.genecards.org/cgi-bin/carddisp.pl?gene=SNX8
SOGA1	Suppressor Of Glucose, Autophagy Associated 1	KIAA0889, C20orf117, SOGA	http://www.genecards.org/cgi-bin/carddisp.pl?gene=SOGA1
SORBS1	Sorbin And SH3 Domain Containing 1	CAP, FLAF2, R85FL, SORB1, ponsin, SH3D5, SH3P12, KIAA0894, KIAA1296	http://www.genecards.org/cgi-bin/carddisp.pl?gene=SORBS1
SORD	Sorbitol Dehydrogenase	HEL-S-95n, SORD1	http://www.genecards.org/cgi-bin/carddisp.pl?gene=SORD
SORT1	Sortilin 1	NT3, LDLCQ6, Gp95, NTR3	http://www.genecards.org/cgi-bin/carddisp.pl?gene=SORT1
SPARC	Secreted Protein Acidic And Cysteine Rich	osteonectin, OI17, ON, BM-40	http://www.genecards.org/cgi-bin/carddisp.pl?gene=SPARC
SPATA20	Spermatogenesis Associated 20	HEL-S-98, SSP411, Tisp78	http://www.genecards.org/cgi-bin/carddisp.pl?gene=SPATA20
SPC24	SPC24, NDC80 Kinetochore Complex Component	SPBC24, hSpc24	http://www.genecards.org/cgi-bin/carddisp.pl?gene=SPC24
SPG7	SPG7, Paraplegin Matrix AAA Peptidase Subunit	SPG5C, paraplegin, PGN, CMAR, CAR	http://www.genecards.org/cgi-bin/carddisp.pl?gene=SPG7
SPRYD7	SPRY Domain Containing 7	C13orf1, CLLD6	http://www.genecards.org/cgi-bin/carddisp.pl?gene=SPRYD7
SPTBN2	Spectrin Beta, Non-Erythrocytic 2	GTRAP41, SCAR14, SCA5, KIAA0302	http://www.genecards.org/cgi-bin/carddisp.pl?gene=SPTBN2
SPTLC2	Serine Palmitoyltransferase Long Chain Base Subunit 2	HSN1C, LCB2A, NSAN1C, SPT2, hLCB2a, LCB2, KIAA0526	http://www.genecards.org/cgi-bin/carddisp.pl?gene=SPTLC2
SQLE	Squalene Epoxidase	ERG1, SE	http://www.genecards.org/cgi-bin/carddisp.pl?gene=SQLE
SRR	Serine Racemase	ISO1, ILV1	http://www.genecards.org/cgi-bin/carddisp.pl?gene=SRR
SRSF9	Serine/Arginine-Rich Splicing Factor 9	SRp30c, SFRS9	http://www.genecards.org/cgi-bin/carddisp.pl?gene=SRSF9
STRN4	Striatin 4	ZIN, zinedin	http://www.genecards.org/cgi-bin/carddisp.pl?gene=STRN4
STXBP1	Syntaxin Binding Protein 1	NSEC1, RBSEC1, UNC18, unc-18A, unc18-1, MUNC18-1, N-Sec1, UNC18A, p67	http://www.genecards.org/cgi-bin/carddisp.pl?gene=STXBP1
STXBP6	Syntaxin Binding Protein 6	HSPC156, amisyn	http://www.genecards.org/cgi-bin/carddisp.pl?gene=STXBP6
SUMF2	Sulfatase Modifying Factor 2	pFGE	http://www.genecards.org/cgi-bin/carddisp.pl?gene=SUMF2
SURF1	Surfeit 1	CMT4K, SURF-1	http://www.genecards.org/cgi-bin/carddisp.pl?gene=SURF1
SWAP70	SWAP Switching B-Cell Complex 70kDa Subunit	HSPC321, SWAP-70, KIAA0640	http://www.genecards.org/cgi-bin/carddisp.pl?gene=SWAP70
SYNGR1	Synaptogyrin 1		http://www.genecards.org/cgi-bin/carddisp.pl?gene=SYNGR1
SYPL1	Synaptophysin Like 1	H-SP1, pantophysin, SYPL	http://www.genecards.org/cgi-bin/carddisp.pl?gene=SYPL1
TACC2	Transforming Acidic Coiled-Coil Containing Protein 2	ECTACC, AZU-1, Anti-Zuai-1	http://www.genecards.org/cgi-bin/carddisp.pl?gene=TACC2
TAMM41	TAM41 Mitochondrial Translocator Assembly And Maintenance Homolog	RAM41, C3orf31, TAM41	http://www.genecards.org/cgi-bin/carddisp.pl?gene=TAMM41
TANGO2	Transport And Golgi Organization 2 Homolog	MECRCN, C22orf25	http://www.genecards.org/cgi-bin/carddisp.pl?gene=TANGO2
TBC1D4	TBC1 Domain Family Member 4	KIAA0603, AS160, NIDDM5	http://www.genecards.org/cgi-bin/carddisp.pl?gene=TBC1D4
TBC1D7	TBC1 Domain Family Member 7	MGCPH, PIG51, TBC7	http://www.genecards.org/cgi-bin/carddisp.pl?gene=TBC1D7
TBCEL	Tubulin Folding Cofactor E-Like	EL, E-like, catastrophin, LRRC35	http://www.genecards.org/cgi-bin/carddisp.pl?gene=TBCEL
TBL1XR1	Transducin (Beta)-Like 1 X-Linked Receptor 1	C21, DC42, IRA1, TBLR1	http://www.genecards.org/cgi-bin/carddisp.pl?gene=TBL1XR1
TBRG4	Transforming Growth Factor Beta Regulator 4	FASTKD4, KIAA0948, CPR2, H_TD2522F11.8	http://www.genecards.org/cgi-bin/carddisp.pl?gene=TBRG4
TDRD7	Tudor Domain Containing 7	TRAP, CATC4, PCTAIRE2BP	http://www.genecards.org/cgi-bin/carddisp.pl?gene=TDRD7
TDRKH	Tudor And KH Domain Containing	TDRD2	http://www.genecards.org/cgi-bin/carddisp.pl?gene=TDRKH
TEP1	Telomerase Associated Protein 1	p240, TROVE1, VAULT2, TLP1, TP1	http://www.genecards.org/cgi-bin/carddisp.pl?gene=TEP1
TESK2	Testis-Specific Kinase 2		http://www.genecards.org/cgi-bin/carddisp.pl?gene=TESK2
TFAM	Transcription Factor A, Mitochondrial	MTTFA, TCF6L1, TCF6L3, TCF6, TCF6L2, TCF-6, MTTF1	http://www.genecards.org/cgi-bin/carddisp.pl?gene=TFAM
TFB1M	Transcription Factor B1, Mitochondrial	mitochondrial, CGI-75, CGI75, mtTFB, h-mtTFB1, hTFB1M, mtTFB1, h-mtTFB	http://www.genecards.org/cgi-bin/carddisp.pl?gene=TFB1M
TFCP2	Transcription Factor CP2	LBP1C, LSF1D, TFCP2C, LSF, SEF	http://www.genecards.org/cgi-bin/carddisp.pl?gene=TFCP2
TFIP11	Tuftelin Interacting Protein 11	StIP, STIP-1, NTR1, TIP39, Spp382, bK445C9.6, hNtr1	http://www.genecards.org/cgi-bin/carddisp.pl?gene=TFIP11
TGFBI	Transforming Growth Factor Beta Induced	CSD, CDB1, CDG2, CDGG1, EBMD, betaig-h3, kerato-epithelin, CSD1, CSD2, CSD3, LCD1, BIGH3, RGD-CAP	http://www.genecards.org/cgi-bin/carddisp.pl?gene=TGFBI
THEM6	Thioesterase Superfamily Member 6	DSCD75, C8orf55	http://www.genecards.org/cgi-bin/carddisp.pl?gene=THEM6
THOC3	THO Complex 3	THO3, hTREX45	http://www.genecards.org/cgi-bin/carddisp.pl?gene=THOC3
THTPA	Thiamine Triphosphatase	THTP, THTPASE	http://www.genecards.org/cgi-bin/carddisp.pl?gene=THTPA
THUMPD3	THUMP Domain Containing 3		http://www.genecards.org/cgi-bin/carddisp.pl?gene=THUMPD3
TIAL1	TIA1 Cytotoxic Granule-Associated RNA Binding Protein-Like 1	TCBP, TIAR	http://www.genecards.org/cgi-bin/carddisp.pl?gene=TIAL1
TIMM17A	Translocase Of Inner Mitochondrial Membrane 17 Homolog A (Yeast)	TIM17, TIM17A, MIMT17, TIMM17	http://www.genecards.org/cgi-bin/carddisp.pl?gene=TIMM17A
TIMM21	Translocase Of Inner Mitochondrial Membrane 21	TIM21, C18orf55, HSPC154	http://www.genecards.org/cgi-bin/carddisp.pl?gene=TIMM21
TIMM23	Translocase Of Inner Mitochondrial Membrane 23	TIM23	http://www.genecards.org/cgi-bin/carddisp.pl?gene=TIMM23
TIMM50	Translocase Of Inner Mitochondrial Membrane 50	TIM50L, TIM50	http://www.genecards.org/cgi-bin/carddisp.pl?gene=TIMM50
TM7SF3	Transmembrane 7 Superfamily Member 3		http://www.genecards.org/cgi-bin/carddisp.pl?gene=TM7SF3
TMA7	Translation Machinery Associated 7 Homolog	CCDC72, HSPC016	http://www.genecards.org/cgi-bin/carddisp.pl?gene=TMA7
TMED3	Transmembrane P24 Trafficking Protein 3	P24B, p24g4, C15orf22, p24gamma4, p26	http://www.genecards.org/cgi-bin/carddisp.pl?gene=TMED3
TMEM205	Transmembrane Protein 205	MBC3205, UNQ501	http://www.genecards.org/cgi-bin/carddisp.pl?gene=TMEM205
TMEM237	Transmembrane Protein 237	JBTS14, ALS2CR4	http://www.genecards.org/cgi-bin/carddisp.pl?gene=TMEM237
TMEM256	Transmembrane Protein 256	C17orf61	http://www.genecards.org/cgi-bin/carddisp.pl?gene=TMEM256
TMEM33	Transmembrane Protein 33	1600019D15Rik, SHINC3, DB83	http://www.genecards.org/cgi-bin/carddisp.pl?gene=TMEM33
TMLHE	Trimethyllysine Hydroxylase, Epsilon	AUTSX6, BBOX2, TMLHED, XAP130, TMLD, TMLH	http://www.genecards.org/cgi-bin/carddisp.pl?gene=TMLHE
TNS1	Tensin 1	tensin, MST122, MST127, MSTP091, MSTP122, MSTP127, PPP1R155, MXRA6, TNS, MST091	http://www.genecards.org/cgi-bin/carddisp.pl?gene=TNS1
TOP2A	Topoisomerase (DNA) II Alpha	TP2A, TOP2	http://www.genecards.org/cgi-bin/carddisp.pl?gene=TOP2A
TOP2B	Topoisomerase (DNA) II Beta	TOPIIB, top2beta	http://www.genecards.org/cgi-bin/carddisp.pl?gene=TOP2B
TPD52L1	Tumor Protein D52-Like 1	D53, hD53	http://www.genecards.org/cgi-bin/carddisp.pl?gene=TPD52L1
TRABD	TraB Domain Containing	TTG2, LP6054, PP2447	http://www.genecards.org/cgi-bin/carddisp.pl?gene=TRABD
TRAPPC3	Trafficking Protein Particle Complex 3	BET3	http://www.genecards.org/cgi-bin/carddisp.pl?gene=TRAPPC3
TRIM2	Tripartite Motif Containing 2	CMT2R, RNF86, KIAA0517	http://www.genecards.org/cgi-bin/carddisp.pl?gene=TRIM2
TRIM32	Tripartite Motif Containing 32	BBS11, TATIP, LGMD2H, HT2A	http://www.genecards.org/cgi-bin/carddisp.pl?gene=TRIM32
TRIM63	Tripartite Motif Containing 63	muRF2, RNF28, IRF, MURF1, SMRZ, MuRF-1	http://www.genecards.org/cgi-bin/carddisp.pl?gene=TRIM63
TRPC4AP	Transient Receptor Potential Cation Channel Subfamily C Member 4 Associated Protein	PPP1R158, TRUSS, C20orf188, TRRP4AP	http://www.genecards.org/cgi-bin/carddisp.pl?gene=TRPC4AP
TSEN15	TRNA Splicing Endonuclease Subunit 15	sen15, C1orf19, HsSEN15	http://www.genecards.org/cgi-bin/carddisp.pl?gene=TSEN15
TSPAN14	Tetraspanin 14	TM4SF14, DC-TM4F2, tspan-14	http://www.genecards.org/cgi-bin/carddisp.pl?gene=TSPAN14
TSPAN9	Tetraspanin 9	NET5, PP1057, tspan-9, NET-5	http://www.genecards.org/cgi-bin/carddisp.pl?gene=TSPAN9
TSR2	TSR2, Ribosome Maturation Factor	DBA14, DT1P1A10, WGG1	http://www.genecards.org/cgi-bin/carddisp.pl?gene=TSR2
TTC19	Tetratricopeptide Repeat Domain 19	2010204O13Rik, MC3DN2	http://www.genecards.org/cgi-bin/carddisp.pl?gene=TTC19
TTC37	Tetratricopeptide Repeat Domain 37	thespin, KIAA0372, THES, Ski3	http://www.genecards.org/cgi-bin/carddisp.pl?gene=TTC37
TTC9C	Tetratricopeptide Repeat Domain 9C		http://www.genecards.org/cgi-bin/carddisp.pl?gene=TTC9C
TTI1	TELO2 Interacting Protein 1	KIAA0406, smg-10, SMG10	http://www.genecards.org/cgi-bin/carddisp.pl?gene=TTI1
TTYH3	Tweety Family Member 3	hTTY3, KIAA1691	http://www.genecards.org/cgi-bin/carddisp.pl?gene=TTYH3
TUBA3C	Tubulin Alpha 3c	bA408E5.3, TUBA2	http://www.genecards.org/cgi-bin/carddisp.pl?gene=TUBA3C
TUBA8	Tubulin Alpha 8	TUBAL2	http://www.genecards.org/cgi-bin/carddisp.pl?gene=TUBA8
TUBB	Tubulin Beta Class I	beta1-tubulin, CDCBM6, CSCSC1, M40, OK/SW-cl.56, TUBB1, TUBB5	http://www.genecards.org/cgi-bin/carddisp.pl?gene=TUBB
TUBB4A	Tubulin Beta 4A Class IVa	TUBB5, TUBB4, beta-5, DYT4	http://www.genecards.org/cgi-bin/carddisp.pl?gene=TUBB4A
TUSC3	Tumor Suppressor Candidate 3	M33, D8S1992, N33, MRT22, MRT7, OST3A	http://www.genecards.org/cgi-bin/carddisp.pl?gene=TUSC3
TXNL4A	Thioredoxin Like 4A	TXNL4, DIM1, BMKS, DIB1, SNRNP15, U5-15kD	http://www.genecards.org/cgi-bin/carddisp.pl?gene=TXNL4A
TYR	Tyrosinase	CMM8, tyrosinase, ATN, OCA1, OCA1A, OCAIA, SHEP3, LB24-AB, SK29-AB	http://www.genecards.org/cgi-bin/carddisp.pl?gene=TYR
UBA52	Ubiquitin A-52 Residue Ribosomal Protein Fusion Product 1	ubiquitin-CEP52, HUBCEP52, L40, RPL40, CEP52, UBCEP2	http://www.genecards.org/cgi-bin/carddisp.pl?gene=UBA52
UBE2A	Ubiquitin Conjugating Enzyme E2 A	HHR6A, MRXS30, MRXSN, UBC2, RAD6A, HR6A	http://www.genecards.org/cgi-bin/carddisp.pl?gene=UBE2A
UBE2B	Ubiquitin Conjugating Enzyme E2 B	E2-17kDa, HR6B, RAD6B, UBC2, HHR6B	http://www.genecards.org/cgi-bin/carddisp.pl?gene=UBE2B
UBE2G2	Ubiquitin Conjugating Enzyme E2 G2	UBC7	http://www.genecards.org/cgi-bin/carddisp.pl?gene=UBE2G2
UBE2H	Ubiquitin Conjugating Enzyme E2 H	E2-20K, GID3, UBC8, UBCH, UBCH2	http://www.genecards.org/cgi-bin/carddisp.pl?gene=UBE2H
UBR5	Ubiquitin Protein Ligase E3 Component N-Recognin 5	DD5, EDD1, EDD, HYD, KIAA0896, hHYD	http://www.genecards.org/cgi-bin/carddisp.pl?gene=UBR5
UGGT1	UDP-Glucose Glycoprotein Glucosyltransferase 1	GT, UGT1, HUGT1, UGCGL1, UGGT, UGTR	http://www.genecards.org/cgi-bin/carddisp.pl?gene=UGGT1
UMPS	Uridine Monophosphate Synthetase	OMPdecase, OPRT, OPRTase	http://www.genecards.org/cgi-bin/carddisp.pl?gene=UMPS
UQCR10	Ubiquinol-Cytochrome C Reductase, Complex III Subunit X	HSPC051, HSPC119, HSPC151, UCRC, 7.2kDa, QCR9, UCCR7.2	http://www.genecards.org/cgi-bin/carddisp.pl?gene=UQCR10
USP13	Ubiquitin Specific Peptidase 13 (Isopeptidase T-3)	IsoT-3, ISOT3	http://www.genecards.org/cgi-bin/carddisp.pl?gene=USP13
USP48	Ubiquitin Specific Peptidase 48	RAP1GA1, USP31	http://www.genecards.org/cgi-bin/carddisp.pl?gene=USP48
UTP4	UTP4, Small Subunit Processome Component	UTP4, CIRHIN, NAIC, TEX292, CIRH1A, KIAA1988	http://www.genecards.org/cgi-bin/carddisp.pl?gene=UTP4
VPS13A	Vacuolar Protein Sorting 13 Homolog A	chorein, CHAC, KIAA0986	http://www.genecards.org/cgi-bin/carddisp.pl?gene=VPS13A
VPS13D	Vacuolar Protein Sorting 13 Homolog D	KIAA0453	http://www.genecards.org/cgi-bin/carddisp.pl?gene=VPS13D
VPS18	VPS18, CORVET/HOPS Core Subunit	hVPS18, KIAA1475, PEP3	http://www.genecards.org/cgi-bin/carddisp.pl?gene=VPS18
VWA9	Von Willebrand Factor A Domain Containing 9	C15orf44	http://www.genecards.org/cgi-bin/carddisp.pl?gene=VWA9
WDFY1	WD Repeat And FYVE Domain Containing 1	KIAA1435, ZFYVE17, FENS-1, WDF1	http://www.genecards.org/cgi-bin/carddisp.pl?gene=WDFY1
WDR18	WD Repeat Domain 18	Ipi3, R32184_1	http://www.genecards.org/cgi-bin/carddisp.pl?gene=WDR18
WDR26	WD Repeat Domain 26	MIP2, GID7, CDW2	http://www.genecards.org/cgi-bin/carddisp.pl?gene=WDR26
WDR4	WD Repeat Domain 4	TRM82, TRMT82	http://www.genecards.org/cgi-bin/carddisp.pl?gene=WDR4
WDR7	WD Repeat Domain 7	KIAA0541, TRAG	http://www.genecards.org/cgi-bin/carddisp.pl?gene=WDR7
WDR75	WD Repeat Domain 75	UTP17, NET16	http://www.genecards.org/cgi-bin/carddisp.pl?gene=WDR75
WDR81	WD Repeat Domain 81	CAMRQ2, PPP1R166, SORF-2	http://www.genecards.org/cgi-bin/carddisp.pl?gene=WDR81
WDR82	WD Repeat Domain 82	MST107, MSTP107, PRO2730, PRO34047, SWD2, TMEM113, WDR82A	http://www.genecards.org/cgi-bin/carddisp.pl?gene=WDR82
WDR91	WD Repeat Domain 91	HSPC049, SORF-1	http://www.genecards.org/cgi-bin/carddisp.pl?gene=WDR91
WDSUB1	WD Repeat, Sterile Alpha Motif And U-Box Domain Containing 1	UBOX6, WDSAM1, 2610014F08Rik	http://www.genecards.org/cgi-bin/carddisp.pl?gene=WDSUB1
WRNIP1	Werner Helicase Interacting Protein 1	bA420G6.2, WHIP	http://www.genecards.org/cgi-bin/carddisp.pl?gene=WRNIP1
XAB2	XPA Binding Protein 2	HCNP, NTC90, SYF1, KIAA1177, HCRN	http://www.genecards.org/cgi-bin/carddisp.pl?gene=XAB2
XPNPEP1	X-Prolyl Aminopeptidase (Aminopeptidase P) 1, Soluble	APP1, SAMP, XPNPEP, XPNPEPL, XPNPEPL1	http://www.genecards.org/cgi-bin/carddisp.pl?gene=XPNPEP1
XPNPEP3	X-Prolyl Aminopeptidase 3, Mitochondrial	ICP55, NPHPL1, APP3	http://www.genecards.org/cgi-bin/carddisp.pl?gene=XPNPEP3
YARS2	Tyrosyl-TRNA Synthetase 2	mitochondrial, TYRRS, CGI-04, MLASA2, MT-TYRRS	http://www.genecards.org/cgi-bin/carddisp.pl?gene=YARS2
YES1	YES Proto-Oncogene 1, Src Family Tyrosine Kinase	c-yes, Yes, P61-YES, HsT441	http://www.genecards.org/cgi-bin/carddisp.pl?gene=YES1
YTHDF2	YTH N6-Methyladenosine RNA Binding Protein 2	CAHL, 9430020E02Rik, NY-REN-2, HGRG8	http://www.genecards.org/cgi-bin/carddisp.pl?gene=YTHDF2
ZC4H2	Zinc Finger C4H2-Type Containing	KIAA1166, WRWF, WWS, HCA127	http://www.genecards.org/cgi-bin/carddisp.pl?gene=ZC4H2
ZFYVE1	Zinc Finger FYVE-Type Containing 1	PPP1R172, ZNFN2A1, DFCP1, SR3, TAFF1, KIAA1589	http://www.genecards.org/cgi-bin/carddisp.pl?gene=ZFYVE1
ZMYM3	Zinc Finger MYM-Type Containing 3	XFIM, ZNF198L2, ZNF261, DXS6673E, KIAA0385, MYM	http://www.genecards.org/cgi-bin/carddisp.pl?gene=ZMYM3
ZNF460	Zinc Finger Protein 460	HZF8, ZNF272	http://www.genecards.org/cgi-bin/carddisp.pl?gene=ZNF460

## Sheet: MeDeBO down Pathways
GeneAnalytics - Pathway results					Prepared for: Juan Luis Fernandez Martinez (jlfm@uniovi.es)
					Date: 12/2/2016
Copyright © LifeMap Sciences, Inc.
	MeDeBO exposed to NK cells Vs Nil (proteins DOWN)
Statistics:
# Identified genes	790
# Matched genes	407
# Matched entities	52
Matching score statistics:
# High score matches	26
# Med score matches	26
# Low score matches	0
	The entities are assigned to wide functional categories identified by a color code (see also figure 5C):
	Response to immune cells
	Cell death
	Adhesion/Morphology/motility
	Oncogenic pathways
	Proliferation
	Response to stress
	Metabolism
	each entity can belong to 1 or more functional categories (i.e. color codes 1, 2, 3)
Results
Score	SuperPath Name	Color code 1	Color code 2	# SuperPath Total Genes	# SuperPath Matched Genes	Matched Genes (Symbols)	Evidence URL
106.686	Metabolism			2472	223	AAAS, AASS, ABCB7, ABCC1, L2HGDH, LAMA4, ECI2, MMAA, ACACA, ACAD10, MMS19, GCAT, ACAT2, LDHA, LDHB, ACLY, ACO1, LDLRAP1, MPC2, ACOX1, ACP5, ACSL1, ACSL3, SMS, ACSS1, ACSS2, MPST, GGCX, LHPP, GLB1, GM2A, GMDS, GNPDA1, GNA11, LPCAT1, GNS, GPAT4, LPGAT1, GPC6, GPC1, PLCB4, PLCG1, MRPS34, GSTM2, LRPPRC, GYS1, HADH, GUSB, PMEL, HACD3, ETFDH, POLE4, POLD1, HEXA, HEXB, POLDIP2, MT-ATP6, MT-CO1, MT-CO2, …	http://pathcards.genecards.org/card/metabolism
38.1971	Lysosome			135	28	ACP5, GGA2, GLB1, GM2A, GNPTAB, GNPTG, GNS, GUSB, HEXA, HEXB, LIPA, SORT1, PSAP, NAGLU, FUCA1, GALNS, SCARB2, SGSH, AP1G1, AP4B1, ASAH1, ARSB, ATP6V0A2, ATP6V0D2, CD63, CTSA, CTSB, CTSH	http://pathcards.genecards.org/card/lysosome
36.6603	Respiratory Electron Transport, ATP Synthesis By Chemiosmotic Coupling, and Heat Production By Uncoupling Proteins.			373	47	L2HGDH, LDHA, LDHB, MPC2, LHPP, PLCB4, LRPPRC, HDAC2, ETFDH, MT-ATP6, MT-CO1, MT-CO2, POLR2G, POLR2H, PPA2, PRKACB, NDUFA10, NDUFAF7, NDUFB1, NDUFA9, NDUFA13, NDUFAB1, NDUFB5, NDUFAF3, NDUFS7, NDUFS3, NRF1, OGDH, PDK1, PDK3, SDHA, AP2B1, SURF1, TFAM, UBE2G2, UQCR10, ATP5B, ATP6AP2, ATP6V0A2, ATP6V0D2, CASP9, COX4I1, COX15, COX6B1, COX7A2L, CYCS, DLAT	http://pathcards.genecards.org/card/respiratory_electron_transport_atp_synthesis_by_chemiosmotic_coupling_and_heat_production_by_uncoupling_proteins
33.1951	Glycosaminoglycan Metabolism			318	41	AAAS, GLB1, GNPDA1, GNS, GPC6, GPC1, GYS1, GUSB, PMEL, HEXA, HEXB, MAN2C1, PPP2R1B, SORD, AGL, PRKACB, PRPS2, AKR1A1, KIF2A, NAGLU, PYGL, NUP93, NUP160, PFKM, PGM1, PGM2, PFKFB2, SEH1L, SGSH, SLC25A12, SLC25A13, SLC25A1, SLC2A1, SLC26A2, UBA52, ARSB, B4GAT1, BPGM, CHST11, DCXR, DERA	http://pathcards.genecards.org/card/glycosaminoglycan_metabolism
28.7824	Glucose Metabolism			146	25	LDHA, LDHB, MPC2, ACSS1, ACSS2, GNPDA1, GYS1, PPP2R1B, AGL, PRKACB, AKR1A1, KIF2A, ALDH1B1, PYGL, PFKM, PGM1, PGM2, PFKFB2, SLC25A12, SLC25A13, SLC25A1, SLC2A1, UBA52, BPGM, DLAT	http://pathcards.genecards.org/card/glucose_metabolism
24.5974	Terpenoid Backbone Biosynthesis			44	13	ACAT2, GLB1, LSS, HMGCS1, HSD17B7, IDI1, FDFT1, FDPS, SQLE, FNTA, PCYOX1, CYP51A1, DHCR7	http://pathcards.genecards.org/card/terpenoid_backbone_biosynthesis
24.1274	Alzheimers Disease			252	31	MLXIP, PLCB4, MT-ATP6, MT-CO1, MT-CO2, IDE, IKBKB, FASN, MAPK3, ITPR2, PSEN2, AKT2, NDUFA10, NDUFB1, NDUFA9, NDUFA13, NDUFAB1, NDUFB5, NDUFS7, NDUFS3, PIK3CD, SDHA, APBB1, APOE, UQCR10, ATP5B, CASP9, COX4I1, COX6B1, COX7A2L, CYCS	http://pathcards.genecards.org/card/alzheimers_disease
23.224	Glycosaminoglycan Degradation			19	9	GLB1, GNS, GUSB, HEXA, HEXB, NAGLU, GALNS, SGSH, ARSB	http://pathcards.genecards.org/card/glycosaminoglycan_degradation
19.5036	Fatty Acid Biosynthesis (WikiPathways)			26	9	ACACA, ACLY, ACSL1, ACSL3, ACSS2, HADH, FASN, PECR, SCD	http://pathcards.genecards.org/card/fatty_acid_biosynthesis_(wikipathways)
18.8266	Regulation of TP53 Activity			379	36	RFC3, LAMTOR3, RHEB, MNAT1, GNPDA1, LRPPRC, MSH2, HDAC2, MT-CO1, MT-CO2, POLR2G, POLR2H, PPP2R1B, PRDX2, FASN, ING5, PRMT1, PRMT5, AK3, AKT2, NELFCD, RABGGTA, RBBP7, SURF1, UBA52, ATM, ATR, BRPF3, BRD1, CARM1, COX4I1, CDK2, COX6B1, COX7A2L, CRADD, CYCS	http://pathcards.genecards.org/card/regulation_of_tp53_activity
18.5257	Transport to The Golgi and Subsequent Modification			1181	80	AAAS, EEF1A2, GGA2, GGCX, GLB1, LONP2, GMDS, EIF3A, EIF3F, MRPS34, GSN, H3F3B, HIST1H3A, MTA1, RNF2, EXOSC5, EXOC8, ADD1, MAN2A1, MAN1B1, PPP6C, FKBP14, SPTBN2, FKBP9, MYO5A, MFGE8, NANP, ALG11, RAB1B, RAB27A, NUDT14, AMDHD2, NUP93, NUP160, FUCA1, FUK, PARN, PARP1, PCID2, PHC3, PIGK, PIGS, PIGT, PIGU, RPN2, SAMM50, SEC11C, SEH1L, SLC25A12, SLC25A13, SUMF2, TGFBI, TIMM50, TIMM17A, TIMM21, TMED3, T…	http://pathcards.genecards.org/card/transport_to_the_golgi_and_subsequent_modification
18.2975	Gene Expression			1750	108	AAAS, RFC3, LAGE3, LAMTOR3, RHEB, EED, EEF1A2, MNAT1, GEMIN5, GNPDA1, EIF3A, EIF3F, MRPS34, GTF3C1, EIF4A3, LRPPRC, H3F3B, MSH2, HDAC2, MT-CO1, MT-CO2, ELAC2, HIST1H3A, POLR3A, POLR2G, POLR2H, MTA1, MTA3, SNRPG, LSM7, EXOSC5, PPA2, HNRNPA3, IARS2, PPP2R1B, PRDX2, IMP3, FASN, ING5, INTS3, PRMT1, IPO8, PRMT5, MAPK3, AK3, MBD2, PSMB5, PSMB6, PSMD8, PSME4, AKT2, MED16, MED17, MED24, NARS2, PUS7, NELF…	http://pathcards.genecards.org/card/gene_expression
17.66	DNA Strand Elongation			48	11	RFC3, LIG1, GINS4, RNASEH2B, POLE4, POLD1, POLDIP2, PRIM1, MCM5, MCM2, MCM7	http://pathcards.genecards.org/card/dna_strand_elongation
17.1321	Metabolism of Water-soluble Vitamins and Cofactors			170	21	ABCC1, MMAA, ACACA, ACP5, GGCX, GPC6, GPC1, PPCDC, PPCS, ENPP1, FASN, MCCC2, NAXD, NADSYN1, NFS1, QPRT, RDH11, SLC2A1, THTPA, APOE, DHFR	http://pathcards.genecards.org/card/metabolism_of_water-soluble_vitamins_and_cofactors
17.0354	Telomere C-strand (Lagging Strand) Synthesis			82	14	RFC3, LIG1, PNKP, POLE4, POLD1, POLDIP2, PRIM1, MCM2, MCM7, PARP1, TOP2A, TOP2B, UBA52, CDK2	http://pathcards.genecards.org/card/telomere_c-strand_(lagging_strand)_synthesis
16.7948	Regulation of Cholesterol Biosynthesis By SREBP (SREBF)			107	16	ACACA, ACLY, ACSS1, LSS, HMGCS1, IDI1, FASN, FDFT1, FDPS, SQLE, SCD, TBL1XR1, CARM1, CYP51A1, DBI, DHCR7	http://pathcards.genecards.org/card/regulation_of_cholesterol_biosynthesis_by_srebp_(srebf)
16.3413	Cholesterol Biosynthesis II (via 24,25-dihydrolanosterol)			26	8	GLB1, LIPA, LSS, HSD17B7, FDFT1, SQLE, CYP51A1, DHCR7	http://pathcards.genecards.org/card/cholesterol_biosynthesis_ii_(via_2425-dihydrolanosterol)
16.0146	Pyrimidine Metabolism (KEGG)			238	25	ACP5, POLE4, POLD1, POLDIP2, POLR3A, POLR2G, POLR2H, EXOSC5, ENPP1, ADSL, PRIM1, IMPDH1, PRPS2, AK3, NUDT2, NT5C, PAICS, PGM1, PGM2, RRM1, RRM2, UMPS, CAD, DCK, DCTPP1	http://pathcards.genecards.org/card/pyrimidine_metabolism_(kegg)
15.7418	Fatty Acyl-CoA Biosynthesis			89	14	ACACA, ACLY, ACOX1, ACSL1, ACSL3, LPCAT1, GPAT4, HADH, HACD3, FASN, GALK2, PECR, SCD, SLC25A1	http://pathcards.genecards.org/card/fatty_acyl-coa_biosynthesis
15.5582	Fatty Acid Metabolism			67	12	ECI2, ACACA, ACAT2, ACOX1, ACSL1, ACSL3, HADH, HACD3, FASN, ALDH1B1, PECR, SCD	http://pathcards.genecards.org/card/fatty_acid_metabolism
14.9974	Regulation of Glucokinase By Glucokinase Regulatory Protein			218	23	AAAS, GEMIN5, PLCG1, EIF4A3, POLR2G, POLR2H, RNF2, SNRPG, PRMT5, MAPK3, KIF2A, KPNA4, KPNA1, KPNA3, NUP93, NUP160, PHC3, SEH1L, SLC2A1, TOP2A, TOP2B, UBA52, CPSF3	http://pathcards.genecards.org/card/regulation_of_glucokinase_by_glucokinase_regulatory_protein
14.6677	Regulation of Lipid Metabolism By Peroxisome Proliferator-activated Receptor Alpha (PPARalpha)			268	26	MMAA, ACACA, ACAD10, ACLY, ACOX1, ACSL1, ACSL3, LPCAT1, GPAT4, HADH, HACD3, HMGCS1, FASN, FDFT1, MED16, MED17, MED19, MED24, NRF1, GALK2, SCD, SLC25A1, TBL1XR1, BDH1, CARM1, CDK4	http://pathcards.genecards.org/card/regulation_of_lipid_metabolism_by_peroxisome_proliferator-activated_receptor_alpha_(pparalpha)
14.3099	Sulfur Amino Acid Metabolism			62	11	LDHA, LDHB, SMS, MPST, MTAP, ADI1, AHCY, AHCYL1, AHCYL2, MAT2A, BCAT2	http://pathcards.genecards.org/card/sulfur_amino_acid_metabolism
13.8761	Thyroid Hormone Signaling Pathway			127	16	RHEB, PLCB4, PLCG1, HDAC2, PRKACB, MAPK3, AKT2, MED16, MED17, MED24, PFKFB2, PIK3CD, SLC2A1, TBC1D4, CASP9, CTNNB1	http://pathcards.genecards.org/card/thyroid_hormone_signaling_pathway
13.8049	Purine Metabolism			101	14	LHPP, ADSL, IMPDH1, AK3, NT5C, NUDT1, PAICS, RRM1, RRM2, UMPS, CAD, CAT, DCK, DCTPP1	http://pathcards.genecards.org/card/purine_metabolism
13.346	Nucleotide Metabolism			26	7	POLD1, ADSL, IMPDH1, PRPS2, RRM1, RRM2, DHFR	http://pathcards.genecards.org/card/nucleotide_metabolism
13.2555	Porphyrin and Chlorophyll Metabolism			146	17	GNPDA1, GYS1, GUSB, PMEL, ENPP1, SORD, AGL, IMPDH1, AKR1A1, KIF2A, ALDH1B1, PYGL, PGM1, PGM2, UMPS, COX15, DCXR	http://pathcards.genecards.org/card/porphyrin_and_chlorophyll_metabolism
13.2324	TP53 Regulates Metabolic Genes			92	13	LAMTOR3, RHEB, GNPDA1, LRPPRC, MT-CO1, MT-CO2, PRDX2, AKT2, SURF1, COX4I1, COX6B1, COX7A2L, CYCS	http://pathcards.genecards.org/card/tp53_regulates_metabolic_genes
13.0967	Galactose Metabolism			46	9	GLB1, GYS1, PMEL, KIF2A, PYGL, GALK2, PFKM, PGM1, PGM2	http://pathcards.genecards.org/card/galactose_metabolism
13.08	Propanoate Metabolism			36	8	ACACA, ACAT2, LDHA, LDHB, ACSS1, ACSS2, ALDH6A1, DBT	http://pathcards.genecards.org/card/propanoate_metabolism
13.0586	Amino Sugar and Nucleotide Sugar Metabolism			57	10	GMDS, GNPDA1, HEXA, HEXB, KIF2A, NANP, AMDHD2, FUK, PGM1, PGM2	http://pathcards.genecards.org/card/amino_sugar_and_nucleotide_sugar_metabolism
12.784	RB in Cancer			95	13	RFC3, MSH6, HLTF, PRIM1, MCM7, RBBP7, RRM1, RRM2, TOP2A, CDK4, CDK2, DCK, DHFR	http://pathcards.genecards.org/card/rb_in_cancer
12.6436	Remodeling of Adherens Junctions			137	16	MAPRE2, PSMD8, RAB5A, RAB5C, ANAPC5, TUBB, TUBA3C, UBE2H, TUBA8, TUBB4A, UBE2A, UBE2B, CDH1, CTNNB1, CTNND1, DNM2	http://pathcards.genecards.org/card/remodeling_of_adherens_junctions
12.6182	Cell Cycle, Mitotic			634	45	AAAS, RFC3, MNAT1, LIG1, GINS4, H3F3B, HAUS8, POLD1, POLDIP2, HIST1H3A, MAD2L1, PPP2R1B, PRIM1, MAPK3, SPC24, PSMB5, PSMB6, KIF23, MCM5, MCM2, KIF2A, MCM7, PSMD8, PSME4, NCAPG2, NCAPH2, RAB1B, NUP93, NUP160, ANAPC5, RBBP7, RCC2, RRM2, SEH1L, TOP2A, TUBB, UBA52, TUBB4A, ATM, ATR, CDK4, CENPC, CKS1B, CDK2, DHFR	http://pathcards.genecards.org/card/cell_cycle_mitotic
12.4954	E2F Mediated Regulation of DNA Replication			97	13	RFC3, POLD1, POLDIP2, PPP2R1B, PRIM1, MCM5, MCM2, MCM7, RRM2, UBA52, ATR, CDK2, DHFR	http://pathcards.genecards.org/card/e2f_mediated_regulation_of_dna_replication
12.055	Sphingolipid Metabolism			87	12	GLB1, GM2A, HEXA, HEXB, PRKD1, PSAP, SPTLC2, SUMF2, ASAH1, ARSB, CTSA, CPTP	http://pathcards.genecards.org/card/sphingolipid_metabolism
12.0438	Mitotic G1-G1/S Phases			157	17	MNAT1, PPP2R1B, PRIM1, PSMB5, PSMB6, MCM5, MCM2, MCM7, PSMD8, RRM2, TOP2A, UBA52, ATM, CDK4, CKS1B, CDK2, DHFR	http://pathcards.genecards.org/card/mitotic_g1-g1s_phases
11.8036	Pyruvate Metabolism			52	9	ACACA, ACAT2, LDHA, LDHB, ACSS1, ACSS2, ME2, ALDH1B1, DLAT	http://pathcards.genecards.org/card/pyruvate_metabolism
11.5409	Mismatch Repair			32	7	RFC3, LIG1, MSH2, MSH3, MSH6, POLD1, POLDIP2	http://pathcards.genecards.org/card/mismatch_repair
11.4678	Insulin Signaling			178	18	RHEB, GYS1, ENPP1, SORBS1, MAP3K2, IKBKB, MAPK3, AKT2, PTPN1, PTPRF, PFKM, PIK3C2A, PIGU, PIK3CD, RPS6KA5, SLC2A1, STXBP1, TBC1D4	http://pathcards.genecards.org/card/insulin_signaling
11.413	Pyruvate Metabolism and Citric Acid (TCA) Cycle			54	9	L2HGDH, LDHA, LDHB, MPC2, OGDH, PDK1, PDK3, SDHA, DLAT	http://pathcards.genecards.org/card/pyruvate_metabolism_and_citric_acid_(tca)_cycle
11.413	Lysine Degradation			54	9	AASS, ACAT2, HADH, PLOD1, PLOD3, KMT2D, ALDH1B1, OGDH, TMLHE	http://pathcards.genecards.org/card/lysine_degradation
11.2284	Nucleotide Excision Repair			67	10	RFC3, MNAT1, LIG1, POLE4, POLD1, POLDIP2, PARP1, UBA52, CUL4A, DDB1	http://pathcards.genecards.org/card/nucleotide_excision_repair
11.0648	Defective B3GAT3 Causes JDSSDHD			68	10	GLB1, GPC6, GPC1, GUSB, HEXA, HEXB, NAGLU, SGSH, ARSB, CHST11	http://pathcards.genecards.org/card/defective_b3gat3_causes_jdssdhd
10.8306	Regulation of TP53 Activity Through Acetylation			25	6	HDAC2, ING5, AKT2, RBBP7, BRPF3, BRD1	http://pathcards.genecards.org/card/regulation_of_tp53_activity_through_acetylation
10.7431	Cell Cycle Control of Chromosomal Replication			46	8	POLE4, POLD1, POLDIP2, MCM5, MCM2, MCM7, CDK4, CDK2	http://pathcards.genecards.org/card/cell_cycle_control_of_chromosomal_replication
10.6837	Valine, Leucine and Isoleucine Degradation			58	9	ACAT2, HADH, HMGCS1, MCCC2, ALDH1B1, ALDH6A1, TMLHE, BCAT2, DBT	http://pathcards.genecards.org/card/valine_leucine_and_isoleucine_degradation
10.5387	Gemtuzumab Ozogamicin Pathway, Pharmacokinetics/Pharmacodynamics			26	6	ABCC1, PARP1, ATM, ATR, CASP9, CYCS	http://pathcards.genecards.org/card/gemtuzumab_ozogamicin_pathway_pharmacokineticspharmacodynamics
10.4479	Development A3 Receptor Signaling			113	13	GNA11, PLCB4, PLCG1, ADRBK1, PREX1, IKBKB, PRKACB, MAPK3, PRKD1, ITPR2, AKT2, PIK3CD, CTNNB1	http://pathcards.genecards.org/card/development_a3_receptor_signaling
10.317	Doxorubicin Pathway, Pharmacokinetics			37	7	ABCC1, MSH2, AKR1A1, NDUFS7, NDUFS3, TOP2A, CAT	http://pathcards.genecards.org/card/doxorubicin_pathway_pharmacokinetics
9.96403	Carbon Metabolism			179	17	ACAT2, ACO1, ACSS1, ACSS2, GNPDA1, ADSL, PRPS2, MAT2A, KIF2A, ME2, ALDH6A1, OGDH, PFKM, SDHA, BCAT2, CAT, DLAT	http://pathcards.genecards.org/card/carbon_metabolism
9.88515	Other Glycan Degradation			19	5	GLB1, HEXA, HEXB, MAN2C1, FUCA1	http://pathcards.genecards.org/card/other_glycan_degradation

## Sheet: MeDeBO down GO BP
GeneAnalytics - Function-based Analysis, GO-Biological Process results					Prepared for: Juan Luis Fernandez Martinez (jlfm@uniovi.es)
					Date: 12/2/2016
Copyright © LifeMap Sciences, Inc.
	MeDeBO exposed to NK cells Vs Nil (proteins DOWN)
Statistics:
# Identified genes	790
# Matched genes	398
# Matched entities	30
Matching score statistics:
# High score matches	23
# Med score matches	7
# Low score matches	0
	The entities are assigned to wide functional categories identified by a color code (see also figure 5C):
	Response to immune cells
	Cell death
	Adhesion/Morphology/motility
	Oncogenic pathways
	Proliferation
	Response to stress
	Metabolism
	each entity can belong to 1 or more functional categories (i.e. color codes 1, 2, 3)
Results
Score	Name	Color code 1	Color code 2	# Genes	# Matched Genes	Matched Genes (Symbols)	Evidence URL
96.7694	Small Molecule Metabolic Process			1551	162	AAAS, AASS, ABCB7, ABCC1, L2HGDH, MMAA, ACACA, ACAD10, MMS19, LDHA, LDHB, ACLY, MPC2, ACOX1, ACP5, ACSL1, ACSL3, SMS, ACSS1, ACSS2, GLB1, GM2A, LPCAT1, GNS, GPAT4, LPGAT1, GPC6, GPC1, PLCB4, PLCG1, GSTM2, GYS1, HADH, GUSB, ETFDH, POLD1, HEXA, HEXB, MT-ATP6, MT-CO1, MT-CO2, MTAP, LSS, LTA4H, HMGCS1, PPCDC, PPCS, PPIP5K2, MTMR1, ADI1, HSD17B7, HSD17B11, ENPP1, SORD, IDI1, ADSL, FAR1, AGL, FASN, PRK…	http://amigo.geneontology.org/amigo/term/GO:0044281
43.0604	Metabolic Process			1151	101	ABCB6, ABCB7, ABCC1, ECE2, ABHD12, ECI2, ACACA, ACAD10, GCAT, ACAT2, ACLY, ACO1, ACOX1, ACP5, ACSL1, ACSL3, ACSS1, ACSS2, MPST, GNA11, LPCAT1, GNS, GPAT4, LPGAT1, PLCG1, GSTM2, GTPBP10, PM20D2, HDHD3, HBS1L, HMGCS1, PPCDC, HSD17B7, HSD17B11, ENPP1, MAN1B1, ADSL, PPP4C, FASN, SPATA20, ISOC2, MBLAC2, MCCC2, KIF23, KIF4B, KIF1B, KIF2A, MDN1, MYO10, MED16, SPTLC2, MYO1D, MFN1, METAP1, MYO5A, MID1, AL…	http://amigo.geneontology.org/amigo/term/GO:0008152
38.4227	Oxidation-reduction Process			681	69	AASS, RETSAT, L2HGDH, ACAD10, LDHA, LDHB, ACOX1, LOXL4, HADH, PLOD1, PLOD3, ETFDH, HIGD2A, MT-CO1, HPDL, ADI1, HSD17B7, HSD17B11, SORD, FAM213A, PRDX6, PRDX2, FAR1, FASN, IMPDH1, JMJD6, FDFT1, KCNAB2, KDM1A, KDM2A, KDM3B, AKR1A1, ME2, SQLE, MICAL1, ALDH1B1, MINA, ALDH6A1, NDUFA9, NDUFS7, QDPR, NDUFS3, NQO2, NXN, OGDH, OXNAD1, OXA1L, PCYOX1, RDH11, PECR, PIR, RRM1, SCD, RRM2, SDHA, SURF1, TMLHE, T…	http://amigo.geneontology.org/amigo/term/GO:0055114
37.6511	Cellular Metabolic Process			158	30	L2HGDH, LDHA, LDHB, MPC2, ETFDH, MT-ATP6, MT-CO1, MT-CO2, NDUFA10, NDUFAF7, NDUFB1, NDUFA9, NDUFA13, NDUFAB1, NDUFB5, NDUFAF3, NDUFS7, NDUFS3, OGDH, PDK1, PDK3, SDHA, UQCR10, ATP5B, COX4I1, COX6B1, COX7A2L, CRCP, CYCS, DLAT	http://amigo.geneontology.org/amigo/term/GO:0044237
31.6653	Carbohydrate Metabolic Process			386	45	AAAS, LDHA, LDHB, GLB1, GNPDA1, GNS, GPC6, GPC1, GYS1, GUSB, HEXA, HEXB, MAN2A1, MAN2C1, SORD, AGL, PRKACB, AKR1A1, ALDH1B1, NAGLU, PYGL, AMDHD2, NUP93, NUP160, FUCA1, GALK2, GALNS, PFKM, PGM1, PGM2, PFKFB2, SEH1L, SGSH, SLC25A12, SLC25A13, SLC25A1, SLC2A1, SLC26A2, UBA52, ARSB, B4GAT1, BPGM, CHID1, CHST11, DCXR	http://amigo.geneontology.org/amigo/term/GO:0005975
26.0828	Respiratory Electron Transport Chain			115	21	ETFDH, MT-ATP6, MT-CO1, MT-CO2, NDUFA10, NDUFAF7, NDUFB1, NDUFA9, NDUFA13, NDUFAB1, NDUFB5, NDUFAF3, NDUFS7, NDUFS3, SDHA, UQCR10, ATP5B, COX4I1, COX6B1, COX7A2L, CYCS	http://amigo.geneontology.org/amigo/term/GO:0022904
21.5943	Glucose Metabolic Process			127	20	GYS1, SORD, AGL, PRKACB, AKR1A1, AKT2, PYGL, PDK1, PDK3, PFKM, PGM1, PGM2, PFKFB2, SLC25A12, SLC25A13, SLC25A1, UBA52, BRAT1, DCXR, DLAT	http://amigo.geneontology.org/amigo/term/GO:0006006
21.4553	Gene Expression			932	70	AAAS, LAGE3, LAMTOR3, RHEB, EED, MNAT1, GEMIN5, EIF3A, EIF3F, GTF3C1, EIF4A3, H3F3B, HDAC2, MT-CO1, MT-CO2, ELAC2, HIST1H3A, POLR3A, POLR2G, POLR2H, SNRPG, LSM7, EXOSC5, PPA2, HNRNPA3, IARS2, PRDX2, IPO8, PRMT5, MAPK3, MBD2, PSMB5, PSMB6, PSMD8, PSME4, MED16, MED17, MED24, NARS2, PUS7, NELFCD, NRBP1, NUP93, NUP160, SRSF9, RBBP7, PARN, PARP1, PCBP2, RPN2, SEC11C, SEH1L, TDRKH, TFAM, TXNL4A, TSEN15…	http://amigo.geneontology.org/amigo/term/GO:0010467
18.467	Water-soluble Vitamin Metabolic Process			86	15	ABCC1, MMAA, ACACA, ACP5, PPCDC, PPCS, ENPP1, FASN, MCCC2, NADSYN1, NFS1, QPRT, SLC2A1, THTPA, DHFR	http://amigo.geneontology.org/amigo/term/GO:0006767
17.9499	Cholesterol Biosynthetic Process			38	10	LSS, HMGCS1, HSD17B7, IDI1, FDFT1, FDPS, SQLE, APOE, CYP51A1, DHCR7	http://amigo.geneontology.org/amigo/term/GO:0006695
16.9566	Vitamin Metabolic Process			94	15	ABCC1, MMAA, ACACA, ACP5, PPCDC, PPCS, ENPP1, FASN, MCCC2, NADSYN1, NFS1, QPRT, SLC2A1, THTPA, DHFR	http://amigo.geneontology.org/amigo/term/GO:0006766
16.7982	Vesicle-mediated Transport			201	23	MON1B, MON2, GGA2, GOLGA4, GSN, KIF1B, SPTBN2, MYO5A, RAB27A, OSBPL1A, RTN3, SCFD2, AP1G1, STXBP1, AP2B1, STXBP6, TBC1D4, AP4B1, TRAPPC3, VPS18, ARF5, C15orf38-AP3S2, CPNE3	http://amigo.geneontology.org/amigo/term/GO:0016192
16.6671	Mitotic Cell Cycle			423	37	AAAS, RFC3, MNAT1, LIG1, GINS4, POLD1, RNF2, MAD2L1, PRIM1, SPC24, PSMB5, PSMB6, KIF23, MCM5, MCM2, KIF2A, MCM7, PSMD8, PSME4, NCAPG2, NCAPH2, NUP93, NUP160, ANAPC5, RCC2, RRM1, RRM2, SEH1L, TOP2A, TUBB, UBA52, TUBB4A, CDK4, CENPC, CKS1B, CDK2, DHFR	http://amigo.geneontology.org/amigo/term/GO:0000278
16.3413	Glycosaminoglycan Catabolic Process			26	8	GLB1, GNS, GPC6, GPC1, GUSB, NAGLU, FUCA1, SGSH	http://amigo.geneontology.org/amigo/term/GO:0006027
16.0336	Dephosphorylation			165	20	ACP5, ACP6, PNKP, PPIP5K2, MTMR1, PPP1R3D, PPP4C, PTP4A2, PTPMT1, PTPN1, PTPN14, PTPRF, NANP, NT5DC1, NT5DC2, NT5DC3, NT5C, PFKFB2, THTPA, BPGM	http://amigo.geneontology.org/amigo/term/GO:0016311
15.7539	Protein Dephosphorylation			256	26	ACP5, ACP6, LHPP, PPA2, PPIP5K2, MTMR1, PPM1H, PPP1R3D, PPP6C, PPP4C, PTP4A2, PTPMT1, PTPN1, PTPN14, PTPRF, NANP, NT5DC1, NT5DC2, NT5DC3, NT5C, PFKFB2, SBF1, TIMM50, BPGM, CYCS, DLGAP5	http://amigo.geneontology.org/amigo/term/GO:0006470
15.2296	Aerobic Respiration			29	8	MT-CO1, ADSL, OXA1L, SIRT3, SURF1, CAT, CHCHD5, COX4I1	http://amigo.geneontology.org/amigo/term/GO:0009060
14.9466	Cellular Protein Metabolic Process			776	55	AAAS, L2HGDH, GGA2, GGCX, GLB1, EIF3A, EIF3F, GSN, H3F3B, HEXB, HIST1H3A, RNF2, EXOC8, ADD1, MAN2A1, MAN1B1, PPP6C, PSEN2, FKBP14, MYO5A, MFGE8, NANP, ALG11, RAB27A, NUP93, NUP160, FUCA1, PARP1, PHC3, PIGK, PIGS, PIGT, PIGU, RPN2, SAMM50, SEC11C, SEH1L, SUMF2, TGFBI, TIMM50, TIMM17A, TIMM21, TIMM23, TRAPPC3, TUSC3, UBA52, TUBA3C, UGGT1, TUBB4A, ARSB, ATP6AP2, CST3, CTSA, CTSH, DDOST	http://amigo.geneontology.org/amigo/term/GO:0044267
14.19	Mitochondrion Organization			86	13	MAN2A1, SPG7, NRF1, OPA1, PARP1, SEPN1, SIRT3, TFB1M, TFAM, ATP5B, CLUH, CXADR, CYCS	http://amigo.geneontology.org/amigo/term/GO:0007005
14.1315	Generation of Precursor Metabolites and Energy			52	10	ACOX1, GNPDA1, ENPP1, NRF1, OGDH, SLC25A3, THTPA, ATP5B, COX4I1, DHTKD1	http://amigo.geneontology.org/amigo/term/GO:0006091
14.0963	Endosome to Melanosome Transport			10	5	RAB32, RAB38, ANKRD27, AP1G1, CD63	http://amigo.geneontology.org/amigo/term/GO:0035646
13.9361	DNA Strand Elongation Involved in DNA Replication			33	8	RFC3, LIG1, GINS4, POLD1, PRIM1, MCM5, MCM2, MCM7	http://amigo.geneontology.org/amigo/term/GO:0006271
13.3322	Glycosphingolipid Metabolic Process			45	9	GLB1, GM2A, HEXA, HEXB, PSAP, ASAH1, ARSB, CTSA, CPTP	http://amigo.geneontology.org/amigo/term/GO:0006687
13.08	DNA Damage Response, Detection of DNA Damage			36	8	RFC3, PNKP, POLD1, PARP1, UBA52, UBE2B, CUL4A, DDB1	http://amigo.geneontology.org/amigo/term/GO:0042769
12.8745	Keratan Sulfate Catabolic Process			12	5	GLB1, GNS, HEXA, HEXB, GALNS	http://amigo.geneontology.org/amigo/term/GO:0042340
12.8591	Cellular Lipid Metabolic Process			179	19	MMAA, ACACA, ACAD10, ACLY, ACOX1, ACSL1, ACSL3, LPCAT1, GPAT4, HADH, HMGCS1, FAR1, FASN, FDFT1, SCD, SLC25A1, TBL1XR1, BDH1, CARM1	http://amigo.geneontology.org/amigo/term/GO:0044255
12.695	Pyruvate Metabolic Process			28	7	LDHA, LDHB, MPC2, PDK1, PDK3, PFKFB2, DLAT	http://amigo.geneontology.org/amigo/term/GO:0006090
12.3314	Attachment of GPI Anchor to Protein			7	4	PIGK, PIGS, PIGT, PIGU	http://amigo.geneontology.org/amigo/term/GO:0016255
11.8558	Lipid Biosynthetic Process			14	5	ACLY, ACSL1, ACSS2, GPAT4, FDFT1	http://amigo.geneontology.org/amigo/term/GO:0008610
11.5352	Glycosaminoglycan Metabolic Process			118	14	GLB1, GNS, GPC6, GPC1, GUSB, HEXA, HEXB, NAGLU, GALNS, SGSH, SLC26A2, ARSB, B4GAT1, CHST11	http://amigo.geneontology.org/amigo/term/GO:0030203
