# Supplementary material for: NK-cell Editing Mediates Epithelial-to-Mesenchymal Transition via Phenotypic and Proteomic Changes in Melanoma Cell Lines
Source: Oxford University Press journal article supplement (doi:10.1158/0008-5472.can-17-1891), 2018-05-11
Supplement: 00085472can171891-sup-185333_3_supp_4730414_p849rj.xlsx [file 00085472can171891-sup-185333_3_supp_4730414_p849rj.xlsx]

## Sheet: MeCoP up Gene Set
GeneAnalytics - Analysis Report
Copyright © LifeMap Sciences, Inc.
	MeCoP exposed to NK cells Vs Nil (proteins UP)
Species	Human
Identified genes (104)
Symbol	Full Name	Aliases	GeneCards URL
AGAP3	ArfGAP With GTPase Domain, Ankyrin Repeat And PH Domain 3	centaurin-gamma-3, cnt-g3, CENTG3, AGAP-3, CRAG, MRIP-1	http://www.genecards.org/cgi-bin/carddisp.pl?gene=AGAP3
ALKBH4	AlkB Homolog 4, Lysine Demethylase	ABH4	http://www.genecards.org/cgi-bin/carddisp.pl?gene=ALKBH4
AMOTL1	Angiomotin Like 1	JEAP	http://www.genecards.org/cgi-bin/carddisp.pl?gene=AMOTL1
ARHGEF2	Rho/Rac Guanine Nucleotide Exchange Factor 2	GEF, GEFH1, GEF-H1, LFP40, KIAA0651, P40	http://www.genecards.org/cgi-bin/carddisp.pl?gene=ARHGEF2
B2M	Beta-2-Microglobulin	beta-2-microglobulin, IMD43, beta-2-microglobin	http://www.genecards.org/cgi-bin/carddisp.pl?gene=B2M
BLOC1S5-TXNDC5	BLOC1S5-TXNDC5 Readthrough (NMD Candidate)	MUTED-TXNDC5	http://www.genecards.org/cgi-bin/carddisp.pl?gene=BLOC1S5-TXNDC5
C19orf66	Chromosome 19 Open Reading Frame 66	RyDEN	http://www.genecards.org/cgi-bin/carddisp.pl?gene=C19orf66
CADM1	Cell Adhesion Molecule 1	BL2, Necl-2, RA175, ST17, sTSLC-1, sgIGSF, synCAM1, IGSF4, TSLC1, IGSF4A, NECL2, SYNCAM, TSLC-1	http://www.genecards.org/cgi-bin/carddisp.pl?gene=CADM1
CD74	CD74 Molecule	p33, HLA-DR-gamma, HLADG, II, Ia-GAMMA, DHLAG	http://www.genecards.org/cgi-bin/carddisp.pl?gene=CD74
CDC42EP1	CDC42 Effector Protein 1	MSE55, BORG5, CEP1	http://www.genecards.org/cgi-bin/carddisp.pl?gene=CDC42EP1
CEBPB	CCAAT/Enhancer Binding Protein Beta	LAP, C/EBP-beta, IL6DBP, NF-IL6, TCF5, LIP, TCF-5	http://www.genecards.org/cgi-bin/carddisp.pl?gene=CEBPB
CENPB	Centromere Protein B	CENP-B	http://www.genecards.org/cgi-bin/carddisp.pl?gene=CENPB
CHMP2A	Charged Multivesicular Body Protein 2A	VPS2, VPS2A, vps2-1, BC2, CHMP2, CHMP2a, hVps2-1, BC-2	http://www.genecards.org/cgi-bin/carddisp.pl?gene=CHMP2A
CMPK2	Cytidine/Uridine Monophosphate Kinase 2	NDK, TMPK2, TYKi, UMP-CMPK2	http://www.genecards.org/cgi-bin/carddisp.pl?gene=CMPK2
CRELD1	Cysteine Rich With EGF Like Domains 1	AVSD2, CIRRIN	http://www.genecards.org/cgi-bin/carddisp.pl?gene=CRELD1
CRIP2	Cysteine Rich Protein 2	ESP1, CRIP, CRP2, CRP-2	http://www.genecards.org/cgi-bin/carddisp.pl?gene=CRIP2
CTCF	CCCTC-Binding Factor	MRD21	http://www.genecards.org/cgi-bin/carddisp.pl?gene=CTCF
CTSS	Cathepsin S		http://www.genecards.org/cgi-bin/carddisp.pl?gene=CTSS
DDX58	DEXD/H-Box Helicase 58	RIGI, SGMRT2, RIG-I, RLR-1, RIG-1	http://www.genecards.org/cgi-bin/carddisp.pl?gene=DDX58
FAM111B	Family With Sequence Similarity 111 Member B	CANP, POIKTMP	http://www.genecards.org/cgi-bin/carddisp.pl?gene=FAM111B
FAM168A	Family With Sequence Similarity 168 Member A	TCRP1, KIAA0280	http://www.genecards.org/cgi-bin/carddisp.pl?gene=FAM168A
FAM65A	Family With Sequence Similarity 65 Member A	KIAA1930	http://www.genecards.org/cgi-bin/carddisp.pl?gene=FAM65A
FANCI	Fanconi Anemia Complementation Group I	KIAA1794	http://www.genecards.org/cgi-bin/carddisp.pl?gene=FANCI
FHL2	Four And A Half LIM Domains 2	AAG11, DRAL, FHL-2, SLIM-3, SLIM3	http://www.genecards.org/cgi-bin/carddisp.pl?gene=FHL2
GARS	Glycyl-TRNA Synthetase	HMN5, GlyRS, DSMAV, SMAD1, CMT2D	http://www.genecards.org/cgi-bin/carddisp.pl?gene=GARS
GBP1	Guanylate Binding Protein 1	huGBP-1, GBP-1	http://www.genecards.org/cgi-bin/carddisp.pl?gene=GBP1
GLG1	Golgi Glycoprotein 1	CFR1, MG160, ESL1, CFR-1, MG-160, ESL-1	http://www.genecards.org/cgi-bin/carddisp.pl?gene=GLG1
GSDMD	Gasdermin D	DF5L, FKSG10, GSDMDC1, DFNA5L	http://www.genecards.org/cgi-bin/carddisp.pl?gene=GSDMD
HELZ2	Helicase With Zinc Finger 2	PDIP-1, PDIP1, PRIC285, KIAA1769	http://www.genecards.org/cgi-bin/carddisp.pl?gene=HELZ2
HIGD2A	HIG1 Hypoxia Inducible Domain Family Member 2A	RCF1b	http://www.genecards.org/cgi-bin/carddisp.pl?gene=HIGD2A
HIST1H1B	Histone Cluster 1, H1b	H1, H1.5, H1B, H1s-3, H1F5	http://www.genecards.org/cgi-bin/carddisp.pl?gene=HIST1H1B
HLA-B	Major Histocompatibility Complex, Class I, B	SPDA1, AS, Bw-47, Bw-50, HLAB, BDT, Bw-22, Bw-4, Bw-41, Bw-44, Bw-45, Bw-46, Bw-48, Bw-52, Bw-53, Bw-54, Bw-55, Bw-56, Bw-57, Bw-58, Bw-60	http://www.genecards.org/cgi-bin/carddisp.pl?gene=HLA-B
HLA-C	Major Histocompatibility Complex, Class I, C	HLAC, HLA-JY3, D6S204, PSORS1, HLC-C	http://www.genecards.org/cgi-bin/carddisp.pl?gene=HLA-C
HLA-DRA	Major Histocompatibility Complex, Class II, DR Alpha	MLRW, HLA-DRA1	http://www.genecards.org/cgi-bin/carddisp.pl?gene=HLA-DRA
HLA-DRB1	Major Histocompatibility Complex, Class II, DR Beta 1	DW2.2/DR2.2, DR-1, DR-12, DR-13, DR-14, DR-16, DR-4, DR-5, DR-7, DR-8, DR-9, DR1, DR12, DR13, DR14, DR16, DR4, DR5, DR7, DR8, DR9, DRB1, HLA-DRB, SS1, HLA-DR1B, DRw8, HLA-DRB2, DRw10, DRw11	http://www.genecards.org/cgi-bin/carddisp.pl?gene=HLA-DRB1
HLA-E	Major Histocompatibility Complex, Class I, E	HLAE, HLA-6.2, QA1, MHC, EA1.2, EA2.1	http://www.genecards.org/cgi-bin/carddisp.pl?gene=HLA-E
HMG20B	High Mobility Group 20B	BRAF25, PP7706, SMARCE1r, SOXL, pp8857, BRAF35, HMGX2, HMGXB2	http://www.genecards.org/cgi-bin/carddisp.pl?gene=HMG20B
ICAM1	Intercellular Adhesion Molecule 1	BB2, CD54, P3.58, ICAM-1	http://www.genecards.org/cgi-bin/carddisp.pl?gene=ICAM1
IDO1	Indoleamine 2,3-Dioxygenase 1	IDO, INDO, IDO-1	http://www.genecards.org/cgi-bin/carddisp.pl?gene=IDO1
ITGA3	Integrin Subunit Alpha 3	CD49C, GAP-B3, ILNEB, VCA-2, MSK18, FRP-2, GAPB3, VL3A, VLA3a	http://www.genecards.org/cgi-bin/carddisp.pl?gene=ITGA3
JUNB	Jun B Proto-Oncogene	AP-1	http://www.genecards.org/cgi-bin/carddisp.pl?gene=JUNB
KMT2D	Lysine Methyltransferase 2D	ALR, KMS, MLL2, MLL4, AAD10, CAGL114, KABUK1, TNRC21	http://www.genecards.org/cgi-bin/carddisp.pl?gene=KMT2D
L1CAM	L1 Cell Adhesion Molecule	MASA, CD171, N-CAML1, HSAS, HSAS1, S10, SPG1, MIC5, CAML1, N-CAM-L1, NCAM-L1	http://www.genecards.org/cgi-bin/carddisp.pl?gene=L1CAM
LAMB1	Laminin Subunit Beta 1	CLM, LIS5	http://www.genecards.org/cgi-bin/carddisp.pl?gene=LAMB1
LAP3	Leucine Aminopeptidase 3	LAP, LAP-3, HEL-S-106, PEPS, LAPEP	http://www.genecards.org/cgi-bin/carddisp.pl?gene=LAP3
LCP1	Lymphocyte Cytosolic Protein 1	CP64, HEL-S-37, L-PLASTIN, LPL, LC64P, LCP-1, PLS2	http://www.genecards.org/cgi-bin/carddisp.pl?gene=LCP1
LGMN	Legumain	LGMN1, PRSC1, legumain, AEP	http://www.genecards.org/cgi-bin/carddisp.pl?gene=LGMN
LTB4R	Leukotriene B4 Receptor	LTB4R1, LTBR1, CMKRL1, GPR16, P2RY7, BLT1, BLTR, LTB4-R1, P2Y7, BLT	http://www.genecards.org/cgi-bin/carddisp.pl?gene=LTB4R
MED25	Mediator Complex Subunit 25	P78, BVSYS, CMT2B2, TCBAP0758, ACID1, ARC92, PTOV2	http://www.genecards.org/cgi-bin/carddisp.pl?gene=MED25
MIB1	Mindbomb E3 Ubiquitin Protein Ligase 1	DIP1, LVNC7, MIB, ZZZ6, DIP-1, ZZANK2, KIAA1323	http://www.genecards.org/cgi-bin/carddisp.pl?gene=MIB1
MOB2	MOB Kinase Activator 2	HCCA2	http://www.genecards.org/cgi-bin/carddisp.pl?gene=MOB2
MVP	Major Vault Protein	LRP, VAULT1	http://www.genecards.org/cgi-bin/carddisp.pl?gene=MVP
NAMPT	Nicotinamide Phosphoribosyltransferase	PBEF, visfatin, 1110035O14Rik, VF, PBEF1, NAmPRTase, Nampt	http://www.genecards.org/cgi-bin/carddisp.pl?gene=NAMPT
NEK9	NIMA Related Kinase 9	NERCC, Nek8, KIAA1995, NERCC1	http://www.genecards.org/cgi-bin/carddisp.pl?gene=NEK9
NNMT	Nicotinamide N-Methyltransferase		http://www.genecards.org/cgi-bin/carddisp.pl?gene=NNMT
NOC3L	NOC3 Like DNA Replication Regulator	C10orf117, AD24, FAD24	http://www.genecards.org/cgi-bin/carddisp.pl?gene=NOC3L
NSUN4	NOP2/Sun RNA Methyltransferase Family Member 4	SHTAP	http://www.genecards.org/cgi-bin/carddisp.pl?gene=NSUN4
NTPCR	Nucleoside-Triphosphatase, Cancer-Related	C1orf57, HCR-NTPase, NTPase	http://www.genecards.org/cgi-bin/carddisp.pl?gene=NTPCR
NUDT4	Nudix Hydrolase 4	DIPP2alpha, DIPP2beta, HDCMB47P, DIPP-2, DIPP2, KIAA0487	http://www.genecards.org/cgi-bin/carddisp.pl?gene=NUDT4
OAS3	2'-5'-Oligoadenylate Synthetase 3	p100, p100OAS	http://www.genecards.org/cgi-bin/carddisp.pl?gene=OAS3
PAPSS2	3'-Phosphoadenosine 5'-Phosphosulfate Synthase 2	SK2, BCYM4, ATPSK2	http://www.genecards.org/cgi-bin/carddisp.pl?gene=PAPSS2
PLEKHG4B	Pleckstrin Homology And RhoGEF Domain Containing G4B	CTD-2231H16.1, KIAA1909	http://www.genecards.org/cgi-bin/carddisp.pl?gene=PLEKHG4B
PLSCR1	Phospholipid Scramblase 1	MMTRA1B	http://www.genecards.org/cgi-bin/carddisp.pl?gene=PLSCR1
PLXNB3	Plexin B3	PLEXB3, PLEXR, PLXN6, KIAA1206	http://www.genecards.org/cgi-bin/carddisp.pl?gene=PLXNB3
PPP1R11	Protein Phosphatase 1 Regulatory Inhibitor Subunit 11	CFAP255, HCG-V, IPP3, TCTEX5, inhibitor-3, TCTE5, HCGV	http://www.genecards.org/cgi-bin/carddisp.pl?gene=PPP1R11
PPP1R18	Protein Phosphatase 1 Regulatory Subunit 18	KIAA1949, HKMT1098	http://www.genecards.org/cgi-bin/carddisp.pl?gene=PPP1R18
PRR14L	Proline Rich 14 Like	C22orf30	http://www.genecards.org/cgi-bin/carddisp.pl?gene=PRR14L
PSMB10	Proteasome Subunit Beta 10	beta2i, MECL1, LMP10	http://www.genecards.org/cgi-bin/carddisp.pl?gene=PSMB10
PSME2	Proteasome Activator Subunit 2	PA28B, REGbeta, PA28beta, REG-beta	http://www.genecards.org/cgi-bin/carddisp.pl?gene=PSME2
PTRF	Polymerase I And Transcript Release Factor	CAVIN, CAVIN1, CGL4, cavin-1, FKSG13	http://www.genecards.org/cgi-bin/carddisp.pl?gene=PTRF
RBBP5	Retinoblastoma Binding Protein 5	SWD1, RBBP-5, RBQ3	http://www.genecards.org/cgi-bin/carddisp.pl?gene=RBBP5
RBCK1	RANBP2-Type And C3HC4-Type Zinc Finger Containing 1	XAP3, XAP4, HOIL1, PBMEI, PGBM1, RBCK2, ZRANB4, C20orf18, HOIL-1, RNF54, UBCE7IP3	http://www.genecards.org/cgi-bin/carddisp.pl?gene=RBCK1
RGPD3	RANBP2-Like And GRIP Domain Containing 3	RGP3	http://www.genecards.org/cgi-bin/carddisp.pl?gene=RGPD3
RNF181	Ring Finger Protein 181	HSPC238	http://www.genecards.org/cgi-bin/carddisp.pl?gene=RNF181
RNF7	Ring Finger Protein 7	SAG, ROC2, rbx2, CKBBP1	http://www.genecards.org/cgi-bin/carddisp.pl?gene=RNF7
RRP9	Ribosomal RNA Processing 9, Small Subunit (SSU) Processome Component, Homolog (Yeast)	RNU3IP2, U3-55K, U355K	http://www.genecards.org/cgi-bin/carddisp.pl?gene=RRP9
SCIN	Scinderin	scinderin, adseverin, KIAA1905	http://www.genecards.org/cgi-bin/carddisp.pl?gene=SCIN
SEC14L2	SEC14 Like Lipid Binding 2	TAP, TAP1, C22orf6, SPF, KIAA1186, KIAA1658, hTAP	http://www.genecards.org/cgi-bin/carddisp.pl?gene=SEC14L2
SERPINA3	Serpin Family A Member 3	ACT, alpha-1-antichymotrypsin, GIG24, AACT, GIG25	http://www.genecards.org/cgi-bin/carddisp.pl?gene=SERPINA3
SETD7	SET Domain Containing Lysine Methyltransferase 7	KMT7, SET7, SET7/9, SET9, KIAA1717	http://www.genecards.org/cgi-bin/carddisp.pl?gene=SETD7
SFSWAP	Splicing Factor, Suppressor Of White-Apricot Homolog	SWAP, SFRS8	http://www.genecards.org/cgi-bin/carddisp.pl?gene=SFSWAP
SH3D19	SH3 Domain Containing 19	EBP, EVE1, Kryn, SH3P19	http://www.genecards.org/cgi-bin/carddisp.pl?gene=SH3D19
SLC2A3	Solute Carrier Family 2 Member 3	GLUT3, GLUT-3	http://www.genecards.org/cgi-bin/carddisp.pl?gene=SLC2A3
SOD2	Superoxide Dismutase 2, Mitochondrial	IPOB, IPO-B, MNSOD, MVCD6, Mn-SOD	http://www.genecards.org/cgi-bin/carddisp.pl?gene=SOD2
SUMO4	Small Ubiquitin-Like Modifier 4	dJ281H8.4, IDDM5, SMT3H4, SUMO-4	http://www.genecards.org/cgi-bin/carddisp.pl?gene=SUMO4
SYNE1	Spectrin Repeat Containing Nuclear Envelope Protein 1	8B, ARCA1, CPG2, EDMD4, Nesp1, SCAR8, dJ45H2.2, enaptin, C6orf98, MYNE1, KIAA0796, KIAA1262, KIAA1756, Myne-1, Syne-1	http://www.genecards.org/cgi-bin/carddisp.pl?gene=SYNE1
SYNGR2	Synaptogyrin 2	cellugyrin	http://www.genecards.org/cgi-bin/carddisp.pl?gene=SYNGR2
TAP2	Transporter 2, ATP-Binding Cassette, Sub-Family B (MDR/TAP)	PSF2, APT2, Y1, ABC18, D6S217E, ABCB3, PSF-2, RING11	http://www.genecards.org/cgi-bin/carddisp.pl?gene=TAP2
TGOLN2	Trans-Golgi Network Protein 2	48, TGN38, TTGN2, TGN46, TGN48, TGN51	http://www.genecards.org/cgi-bin/carddisp.pl?gene=TGOLN2
TIMM17B	Translocase Of Inner Mitochondrial Membrane 17 Homolog B (Yeast)	DXS9822, JM3, TIM17B	http://www.genecards.org/cgi-bin/carddisp.pl?gene=TIMM17B
TIMM22	Translocase Of Inner Mitochondrial Membrane 22 Homolog (Yeast)	TEX4, TIM22	http://www.genecards.org/cgi-bin/carddisp.pl?gene=TIMM22
TMEM55B	Transmembrane Protein 55B	C14orf9	http://www.genecards.org/cgi-bin/carddisp.pl?gene=TMEM55B
TRIM21	Tripartite Motif Containing 21	SSA, Ro/SSA, ro(SS-A), SSA1, RNF81, RO52, SS-A	http://www.genecards.org/cgi-bin/carddisp.pl?gene=TRIM21
TRIM22	Tripartite Motif Containing 22	GPSTAF50, staf-50, RNF94, STAF50	http://www.genecards.org/cgi-bin/carddisp.pl?gene=TRIM22
TRIM4	Tripartite Motif Containing 4	RNF87	http://www.genecards.org/cgi-bin/carddisp.pl?gene=TRIM4
TSEN15	TRNA Splicing Endonuclease Subunit 15	sen15, C1orf19, HsSEN15	http://www.genecards.org/cgi-bin/carddisp.pl?gene=TSEN15
TTLL10	Tubulin Tyrosine Ligase Like 10	TTLL5	http://www.genecards.org/cgi-bin/carddisp.pl?gene=TTLL10
UBE2Z	Ubiquitin Conjugating Enzyme E2 Z	HOYS7, USE1	http://www.genecards.org/cgi-bin/carddisp.pl?gene=UBE2Z
VGF	VGF Nerve Growth Factor Inducible	SCG7, SgVII	http://www.genecards.org/cgi-bin/carddisp.pl?gene=VGF
WARS	Tryptophanyl-TRNA Synthetase	cytoplasmic, WRS, GAMMA-2, trpRS, IFI53, IFP53, hWRS	http://www.genecards.org/cgi-bin/carddisp.pl?gene=WARS
WIPF1	WAS/WASL Interacting Protein Family Member 1	PRPL-2, WAS2, WASPIP, WIP	http://www.genecards.org/cgi-bin/carddisp.pl?gene=WIPF1
ZBTB38	Zinc Finger And BTB Domain Containing 38	CIBZ, PPP1R171, ZNF921	http://www.genecards.org/cgi-bin/carddisp.pl?gene=ZBTB38
ZCCHC17	Zinc Finger CCHC-Type Containing 17	HSPC251, PS1D, pNO40	http://www.genecards.org/cgi-bin/carddisp.pl?gene=ZCCHC17
ZYX	Zyxin	zyxin, ESP-2, HED-2, zyxin-2	http://www.genecards.org/cgi-bin/carddisp.pl?gene=ZYX

## Sheet: MeCoP up Pathways
GeneAnalytics - Pathway results
Copyright © LifeMap Sciences, Inc.
	MeCoP exposed to NK cells Vs Nil (proteins UP)
Statistics:
# Identified genes	104
# Matched genes	44
# Matched entities	21
Matching score statistics:
# High score matches	8
# Med score matches	13
# Low score matches	0
	The entities are assigned to wide functional categories identified by a color code (see also figure 5C):
	Response to immune cells
	Cell death
	Adhesion/Morphology/motility
	Oncogenic pathways
	Proliferation
	Response to stress
	Metabolism
	each entity can belong to 1 or more functional categories (i.e. color codes 1, 2, 3)
Results
Score	SuperPath Name	Color code 1	Color code 2	# SuperPath Total Genes	# SuperPath Matched Genes	Matched Genes (Symbols)	Evidence URL
29.708	Interferon Gamma Signaling			208	12	HLA-DRA, HLA-DRB1, HLA-B, HLA-E, HLA-C, ICAM1, OAS3, GBP1, TRIM21, TRIM22, B2M, DDX58	http://pathcards.genecards.org/card/interferon_gamma_signaling
29.0808	Allograft Rejection			268	13	LGMN, HLA-DRA, HLA-DRB1, HLA-B, HLA-E, HLA-C, ICAM1, PSME2, SEC14L2, TAP2, B2M, CD74, CTSS	http://pathcards.genecards.org/card/allograft_rejection
27.4465	Antigen Processing- Ubiquitination and Proteasome Degradation			355	14	HLA-B, HLA-E, HLA-C, RNF7, PSMB10, PSME2, RBCK1, SEC14L2, TAP2, TRIM4, TRIM21, UBE2Z, B2M, CTSS	http://pathcards.genecards.org/card/antigen_processing-_ubiquitination_and_proteasome_degradation
26.554	Antigen Presentation- Folding, Assembly and Peptide Loading of Class I MHC			28	6	HLA-B, HLA-E, HLA-C, SEC14L2, TAP2, B2M	http://pathcards.genecards.org/card/antigen_presentation-_folding_assembly_and_peptide_loading_of_class_i_mhc
23.2977	Cell Adhesion Molecules (CAMs)			148	9	L1CAM, GLG1, HLA-DRA, HLA-DRB1, HLA-B, HLA-E, HLA-C, ICAM1, CADM1	http://pathcards.genecards.org/card/cell_adhesion_molecules_(cams)
19.3405	Influenza A			334	11	HLA-DRA, HLA-DRB1, HLA-B, HLA-E, HLA-C, ICAM1, OAS3, SEC14L2, TAP2, CD74, DDX58	http://pathcards.genecards.org/card/influenza_a
18.5453	Phagosome			164	8	HLA-DRA, HLA-DRB1, HLA-B, HLA-E, HLA-C, SEC14L2, TAP2, CTSS	http://pathcards.genecards.org/card/phagosome
16.7518	Immune System			1631	23	LGMN, HLA-DRA, HLA-DRB1, HLA-B, HLA-E, HLA-C, ICAM1, PSMB10, PSME2, OAS3, RBCK1, GBP1, SEC14L2, TAP2, TRIM4, TRIM21, TRIM22, UBE2Z, WIPF1, B2M, CD74, CTSS, DDX58	http://pathcards.genecards.org/card/immune_system
12.8264	Actin Nucleation By ARP-WASP Complex			368	9	HLA-DRA, HLA-DRB1, HLA-B, HLA-E, HLA-C, ITGA3, WIPF1, ARHGEF2, CDC42EP1	http://pathcards.genecards.org/card/actin_nucleation_by_arp-wasp_complex
12.7841	Epstein-Barr Virus Infection			215	7	HLA-DRA, HLA-DRB1, HLA-B, HLA-E, HLA-C, ICAM1, DDX58	http://pathcards.genecards.org/card/epstein-barr_virus_infection
12.5164	Type II Interferon Signaling (IFNG)			52	4	HLA-B, ICAM1, GBP1, SEC14L2	http://pathcards.genecards.org/card/type_ii_interferon_signaling_(ifng)
12.036	MHC Class II Antigen Presentation			105	5	LGMN, HLA-DRA, HLA-DRB1, CD74, CTSS	http://pathcards.genecards.org/card/mhc_class_ii_antigen_presentation
11.9736	Immune Response Antigen Presentation By MHC Class II			106	5	LGMN, HLA-DRA, HLA-DRB1, CD74, CTSS	http://pathcards.genecards.org/card/immune_response_antigen_presentation_by_mhc_class_ii
10.0595	Natural Killer Cell Receptors: Human Target Cell-NK Cell Ligand-Receptor Interactions			82	4	HLA-B, HLA-E, HLA-C, CADM1	http://pathcards.genecards.org/card/natural_killer_cell_receptors_human_target_cell__nk_cell_ligand-receptor_interactions
9.79959	Immune Response Role of DAP12 Receptors in NK Cells			222	6	HLA-B, HLA-E, HLA-C, ICAM1, JUNB, WIPF1	http://pathcards.genecards.org/card/immune_response_role_of_dap12_receptors_in_nk_cells
9.48043	Immunoregulatory Interactions Between A Lymphoid and A Non-Lymphoid Cell			156	5	HLA-B, HLA-E, HLA-C, ICAM1, B2M	http://pathcards.genecards.org/card/immunoregulatory_interactions_between_a_lymphoid_and_a_non-lymphoid_cell
9.4525	Immune Response IFN Alpha/beta Signaling Pathway			92	4	HLA-B, HLA-E, HLA-C, OAS3	http://pathcards.genecards.org/card/immune_response_ifn_alphabeta_signaling_pathway
9.25595	Activated PKN1 Stimulates Transcription of AR (androgen Receptor) Regulated Genes KLK2 and KLK3			627	10	HLA-DRA, HLA-DRB1, HMG20B, KMT2D, PTRF, RBBP5, SETD7, TRIM21, B2M, CTCF	http://pathcards.genecards.org/card/activated_pkn1_stimulates_transcription_of_ar_(androgen_receptor)_regulated_genes_klk2_and_klk3
9.14716	Developmental Biology			861	12	L1CAM, LAMB1, LCP1, PLXNB3, HELZ2, PSMB10, PSME2, KMT2D, MED25, RBBP5, CEBPB, CTCF	http://pathcards.genecards.org/card/developmental_biology
8.90456	Interleukin-3, 5 and GM-CSF Signaling			1382	16	HLA-DRA, HLA-DRB1, HLA-B, HLA-E, LTB4R, HLA-C, ICAM1, PSMB10, PSME2, OAS3, GBP1, TRIM21, TRIM22, ARHGEF2, B2M, DDX58	http://pathcards.genecards.org/card/interleukin-3_5_and_gm-csf_signaling
8.57078	Cell Surface Interactions at The Vascular Wall			109	4	L1CAM, GLG1, ITGA3, CD74	http://pathcards.genecards.org/card/cell_surface_interactions_at_the_vascular_wall

## Sheet: MeCoP up GO BP
GeneAnalytics - Function-based Analysis, GO-Biological Process results
Copyright © LifeMap Sciences, Inc.
	MeCoP exposed to NK cells Vs Nil (proteins UP)
Statistics:
# Identified genes	104
# Matched genes	32
# Matched entities	30
Matching score statistics:
# High score matches	12
# Med score matches	18
# Low score matches	0
	The entities are assigned to wide functional categories identified by a color code (see also figure 5C):
	Response to immune cells
	Cell death
	Adhesion/Morphology/motility
	Oncogenic pathways
	Proliferation
	Response to stress
	Metabolism
	each entity can belong to 1 or more functional categories (i.e. color codes 1, 2, 3)
Results
Score	Name	Color code 1	Color code 2	# Genes	# Matched Genes	Matched Genes (Symbols)	Evidence URL
41.0418	Interferon-gamma-mediated Signaling Pathway			77	11	HLA-DRA, HLA-DRB1, HLA-B, HLA-E, HLA-C, ICAM1, OAS3, GBP1, TRIM21, TRIM22, B2M	http://amigo.geneontology.org/amigo/term/GO:0060333
29.189	Antigen Processing and Presentation of Exogenous Peptide Antigen Via MHC Class I, TAP-independent			9	5	HLA-B, HLA-E, HLA-C, B2M, CTSS	http://amigo.geneontology.org/amigo/term/GO:0002480
26.453	Antigen Processing and Presentation of Exogenous Peptide Antigen Via MHC Class I			79	8	HLA-B, HLA-E, HLA-C, PSMB10, PSME2, TAP2, B2M, CTSS	http://amigo.geneontology.org/amigo/term/GO:0042590
24.4091	Antigen Processing and Presentation			62	7	HLA-DRA, HLA-DRB1, HLA-B, HLA-E, HLA-C, CD74, CTSS	http://amigo.geneontology.org/amigo/term/GO:0019882
23.9714	Antigen Processing and Presentation of Peptide Antigen Via MHC Class I			99	8	HLA-B, HLA-E, HLA-C, PSMB10, PSME2, TAP2, B2M, CTSS	http://amigo.geneontology.org/amigo/term/GO:0002474
22.5662	Antigen Processing and Presentation of Exogenous Peptide Antigen Via MHC Class I, TAP-dependent			75	7	HLA-B, HLA-E, HLA-C, PSMB10, PSME2, TAP2, B2M	http://amigo.geneontology.org/amigo/term/GO:0002479
21.8564	Cytokine-mediated Signaling Pathway			279	11	HLA-DRA, HLA-DRB1, HLA-B, HLA-E, HLA-C, ICAM1, OAS3, GBP1, TRIM21, TRIM22, B2M	http://amigo.geneontology.org/amigo/term/GO:0019221
19.2761	Immune Response			408	12	HLA-DRA, HLA-DRB1, HLA-B, HLA-E, LTB4R, HLA-C, OAS3, TRIM22, B2M, CD74, CEBPB, CTSS	http://amigo.geneontology.org/amigo/term/GO:0006955
15.9287	Protein Trimerization			9	3	TRIM4, TRIM21, TRIM22	http://amigo.geneontology.org/amigo/term/GO:0070206
14.8068	Viral Process			557	12	HLA-DRA, HLA-DRB1, HLA-B, HLA-C, PSMB10, PSME2, RBCK1, TRIM22, ZYX, B2M, CHMP2A, DDX58	http://amigo.geneontology.org/amigo/term/GO:0016032
14.1987	Polysaccharide Assembly With MHC Class II Protein Complex			2	2	HLA-DRA, HLA-DRB1	http://amigo.geneontology.org/amigo/term/GO:0002506
13.7505	Positive Regulation of T Cell Mediated Cytotoxicity			15	3	HLA-B, HLA-E, B2M	http://amigo.geneontology.org/amigo/term/GO:0001916
13.0337	Antigen Processing and Presentation of Endogenous Peptide Antigen Via MHC Class I Via ER Pathway, TAP-independent			3	2	HLA-B, HLA-C	http://amigo.geneontology.org/amigo/term/GO:0002486
12.8407	Antigen Processing and Presentation of Exogenous Peptide Antigen Via MHC Class II			93	5	LGMN, HLA-DRA, HLA-DRB1, CD74, CTSS	http://amigo.geneontology.org/amigo/term/GO:0019886
12.2085	Antigen Processing and Presentation of Exogenous Protein Antigen Via MHC Class Ib, TAP-dependent			4	2	TAP2, B2M	http://amigo.geneontology.org/amigo/term/GO:0002481
11.5696	Peptide Antigen Assembly With MHC Class II Protein Complex			5	2	HLA-DRA, HLA-DRB1	http://amigo.geneontology.org/amigo/term/GO:0002503
11.0484	Positive Regulation of Type 2 Immune Response			6	2	IDO1, CD74	http://amigo.geneontology.org/amigo/term/GO:0002830
11.0484	Protection From Natural Killer Cell Mediated Cytotoxicity			6	2	HLA-B, HLA-E	http://amigo.geneontology.org/amigo/term/GO:0042270
10.8279	Type I Interferon Signaling Pathway			71	4	HLA-B, HLA-E, HLA-C, OAS3	http://amigo.geneontology.org/amigo/term/GO:0060337
10.7232	Innate Immune Response			869	13	LGMN, HLA-B, HLA-E, HLA-C, PSMB10, PSME2, TRIM4, TRIM21, WIPF1, ARHGEF2, B2M, CTSS, DDX58	http://amigo.geneontology.org/amigo/term/GO:0045087
10.6085	Antigen Processing and Presentation of Endogenous Peptide Antigen Via MHC Class I			7	2	TAP2, B2M	http://amigo.geneontology.org/amigo/term/GO:0019885
10.2281	Positive Regulation of Actin Nucleation			8	2	SCIN, WIPF1	http://amigo.geneontology.org/amigo/term/GO:0051127
10.0764	Protein Polyubiquitination			142	5	PSMB10, PSME2, RBCK1, TRIM21, UBE2Z	http://amigo.geneontology.org/amigo/term/GO:0000209
10.0755	Negative Regulation of T Cell Proliferation			36	3	HLA-DRB1, IDO1, CEBPB	http://amigo.geneontology.org/amigo/term/GO:0042130
9.89957	Regulation of Immune Response			146	5	HLA-B, HLA-E, HLA-C, ICAM1, B2M	http://amigo.geneontology.org/amigo/term/GO:0050776
9.89313	Negative Regulation of Necroptotic Process			9	2	RBCK1, ARHGEF2	http://amigo.geneontology.org/amigo/term/GO:0060546
9.89313	Response to Acidic PH			9	2	LGMN, CTSS	http://amigo.geneontology.org/amigo/term/GO:0010447
9.74535	Acute-phase Response			39	3	PLSCR1, SERPINA3, CEBPB	http://amigo.geneontology.org/amigo/term/GO:0006953
9.68605	T Cell Receptor Signaling Pathway			151	5	HLA-DRA, HLA-DRB1, PSMB10, PSME2, RBCK1	http://amigo.geneontology.org/amigo/term/GO:0050852
9.59401	Response to Gonadotropin			10	2	ICAM1, ITGA3	http://amigo.geneontology.org/amigo/term/GO:0034698

## Sheet: MeCoP down Gene Set
GeneAnalytics - Analysis Report			Prepared for: Juan Luis Fernandez Martinez (jlfm@uniovi.es)
			Date: 12/2/2016
Copyright © LifeMap Sciences, Inc.
	MeCoP exposed to NK cells Vs Nil (proteins DOWN)
Species	Human
Identified genes (76)
Symbol	Full Name	Aliases	GeneCards URL
ABCD1	ATP Binding Cassette Subfamily D Member 1	ABC42, AMN, ALD, ALDP	http://www.genecards.org/cgi-bin/carddisp.pl?gene=ABCD1
ACSL3	Acyl-CoA Synthetase Long-Chain Family Member 3	PRO2194, FACL3, ACS3, LACS3	http://www.genecards.org/cgi-bin/carddisp.pl?gene=ACSL3
ALDH1B1	Aldehyde Dehydrogenase 1 Family Member B1	ALDH5, ALDHX	http://www.genecards.org/cgi-bin/carddisp.pl?gene=ALDH1B1
ALG1	ALG1, Chitobiosyldiphosphodolichol Beta-Mannosyltransferase	CDG1K, HMT-1, Mat-1, beta-1,4-mannosyltransferase, mannosyltransferase-1, HMAT1, HMT1, MT-1, hMat-1	http://www.genecards.org/cgi-bin/carddisp.pl?gene=ALG1
AMOT	Angiomotin	angiomotin, KIAA1071	http://www.genecards.org/cgi-bin/carddisp.pl?gene=AMOT
ARAP1	ArfGAP With RhoGAP Domain, Ankyrin Repeat And PH Domain 1	centaurin-delta-2, cnt-d2, CENTD2, KIAA0782	http://www.genecards.org/cgi-bin/carddisp.pl?gene=ARAP1
AUP1	Ancient Ubiquitous Protein 1		http://www.genecards.org/cgi-bin/carddisp.pl?gene=AUP1
C1orf116	Chromosome 1 Open Reading Frame 116	SARG	http://www.genecards.org/cgi-bin/carddisp.pl?gene=C1orf116
CAPN5	Calpain 5	ADNIV, HTRA3, VRNI, nCL-3, NCL3	http://www.genecards.org/cgi-bin/carddisp.pl?gene=CAPN5
CARD16	Caspase Recruitment Domain Family Member 16	PSEUDO-ICE, COP, COP1	http://www.genecards.org/cgi-bin/carddisp.pl?gene=CARD16
CD46	CD46 Molecule	MCP, AHUS2, TRA2.10, MIC10, TLX	http://www.genecards.org/cgi-bin/carddisp.pl?gene=CD46
CD63	CD63 Molecule	ME491, granulophysin, tetraspanin-30, tspan-30, MLA1, LAMP-3, OMA81H, TSPAN30	http://www.genecards.org/cgi-bin/carddisp.pl?gene=CD63
CDK2	Cyclin-Dependent Kinase 2	p33(CDK2), CDKN2	http://www.genecards.org/cgi-bin/carddisp.pl?gene=CDK2
CFAP20	Cilia And Flagella Associated Protein 20	EVORF, GTL3, fSAP23, C16orf80, BUG22	http://www.genecards.org/cgi-bin/carddisp.pl?gene=CFAP20
CLPTM1L	CLPTM1-Like	CLPTM1-like, CRR9, CRR9p	http://www.genecards.org/cgi-bin/carddisp.pl?gene=CLPTM1L
CTSD	Cathepsin D	ceroid-lipofuscinosis, CLN10, HEL-S-130P, CPSD	http://www.genecards.org/cgi-bin/carddisp.pl?gene=CTSD
CYP51A1	Cytochrome P450 Family 51 Subfamily A Member 1	CP51, CYPL1, P450-14DM, P450L1, CYP51, CYPLI, LDM	http://www.genecards.org/cgi-bin/carddisp.pl?gene=CYP51A1
DHFR	Dihydrofolate Reductase	DHFRP1, DYR	http://www.genecards.org/cgi-bin/carddisp.pl?gene=DHFR
FAM173A	Family With Sequence Similarity 173 Member A	C16orf24	http://www.genecards.org/cgi-bin/carddisp.pl?gene=FAM173A
FAM213A	Family With Sequence Similarity 213 Member A	PAMM, C10orf58	http://www.genecards.org/cgi-bin/carddisp.pl?gene=FAM213A
FAR1	Fatty Acyl-CoA Reductase 1	PFCRD, SDR10E1, MLSTD2	http://www.genecards.org/cgi-bin/carddisp.pl?gene=FAR1
FAS	Fas Cell Surface Death Receptor	ALPS1A, APO-1, CD95, FASTM, APT1, FAS1, TNFRSF6	http://www.genecards.org/cgi-bin/carddisp.pl?gene=FAS
FASN	Fatty Acid Synthase	OA-519, SDR27X1, FAS	http://www.genecards.org/cgi-bin/carddisp.pl?gene=FASN
FDPS	Farnesyl Diphosphate Synthase	dimethylallyltranstransferase, geranyltranstransferase, FPS, KIAA1293, FPPS, POROK9	http://www.genecards.org/cgi-bin/carddisp.pl?gene=FDPS
FEN1	Flap Structure-Specific Endonuclease 1	RAD2, MF1, FEN-1, hFEN-1	http://www.genecards.org/cgi-bin/carddisp.pl?gene=FEN1
FUCA2	Fucosidase, Alpha-L- 2, Plasma	dJ20N2.5	http://www.genecards.org/cgi-bin/carddisp.pl?gene=FUCA2
GEMIN7	Gem Nuclear Organelle Associated Protein 7	gemin-7, SIP3	http://www.genecards.org/cgi-bin/carddisp.pl?gene=GEMIN7
GPRC5B	G Protein-Coupled Receptor Class C Group 5 Member B	A-69G12.1, RAIG2, RAIG-2	http://www.genecards.org/cgi-bin/carddisp.pl?gene=GPRC5B
GTF3C2	General Transcription Factor IIIC Subunit 2	TFIIIC-BETA, TF3C-beta, TFIIIC110, KIAA0011	http://www.genecards.org/cgi-bin/carddisp.pl?gene=GTF3C2
HMGCS1	3-Hydroxy-3-Methylglutaryl-CoA Synthase 1	HMGCS	http://www.genecards.org/cgi-bin/carddisp.pl?gene=HMGCS1
HPGD	Hydroxyprostaglandin Dehydrogenase 15-(NAD)	PGDH, PHOAR1, 15-PGDH, PGDH1, SDR36C1	http://www.genecards.org/cgi-bin/carddisp.pl?gene=HPGD
HSD17B4	Hydroxysteroid (17-Beta) Dehydrogenase 4	peroxisomal, beta-keto-reductase, PRLTS1, MFE-2, MPF-2, SDR8C1, EDH17B4, DBP	http://www.genecards.org/cgi-bin/carddisp.pl?gene=HSD17B4
IDI1	Isopentenyl-Diphosphate Delta Isomerase 1	IPP1, IPPI1	http://www.genecards.org/cgi-bin/carddisp.pl?gene=IDI1
ITGA7	Integrin Subunit Alpha 7		http://www.genecards.org/cgi-bin/carddisp.pl?gene=ITGA7
LRRC58	Leucine Rich Repeat Containing 58		http://www.genecards.org/cgi-bin/carddisp.pl?gene=LRRC58
LYRM7	LYR Motif Containing 7	MC3DN8, C5orf31, MZM1L	http://www.genecards.org/cgi-bin/carddisp.pl?gene=LYRM7
MBLAC2	Metallo-Beta-Lactamase Domain Containing 2		http://www.genecards.org/cgi-bin/carddisp.pl?gene=MBLAC2
MCM3	Minichromosome Maintenance Complex Component 3	p102, HCC5, P1.h, RLFB, P1-MCM3	http://www.genecards.org/cgi-bin/carddisp.pl?gene=MCM3
MCM6	Minichromosome Maintenance Complex Component 6	MCG40308, Mis5, P105MCM	http://www.genecards.org/cgi-bin/carddisp.pl?gene=MCM6
MDN1	Midasin AAA ATPase 1	Rea1, KIAA0301	http://www.genecards.org/cgi-bin/carddisp.pl?gene=MDN1
MLANA	Melan-A	melan-A, MART-1, MART1	http://www.genecards.org/cgi-bin/carddisp.pl?gene=MLANA
MRPL44	Mitochondrial Ribosomal Protein L44	MRP-L44, L44MT, COXPD16, mitochondrial	http://www.genecards.org/cgi-bin/carddisp.pl?gene=MRPL44
MYO10	Myosin X	myosin-X, KIAA0799	http://www.genecards.org/cgi-bin/carddisp.pl?gene=MYO10
NCAPD2	Non-SMC Condensin I Complex Subunit D2	CAP-D2, hCAP-D2, CAPD2, KIAA0159, CNAP1	http://www.genecards.org/cgi-bin/carddisp.pl?gene=NCAPD2
NDUFB5	NADH:Ubiquinone Oxidoreductase Subunit B5	CISGDH, SGDH, CI-SGDH	http://www.genecards.org/cgi-bin/carddisp.pl?gene=NDUFB5
NT5DC1	5'-Nucleotidase Domain Containing 1	C6orf200, LP2642, NT5C2L1	http://www.genecards.org/cgi-bin/carddisp.pl?gene=NT5DC1
OAT	Ornithine Aminotransferase	GACR, HOGA, OATASE, OKT	http://www.genecards.org/cgi-bin/carddisp.pl?gene=OAT
PCNA	Proliferating Cell Nuclear Antigen	ATLD2, cyclin	http://www.genecards.org/cgi-bin/carddisp.pl?gene=PCNA
PCYOX1	Prenylcysteine Oxidase 1	PCL1, KIAA0908	http://www.genecards.org/cgi-bin/carddisp.pl?gene=PCYOX1
PDCD4	Programmed Cell Death 4 (Neoplastic Transformation Inhibitor)	H731	http://www.genecards.org/cgi-bin/carddisp.pl?gene=PDCD4
PDLIM2	PDZ And LIM Domain 2	SLIM, mystique	http://www.genecards.org/cgi-bin/carddisp.pl?gene=PDLIM2
PLBD2	Phospholipase B Domain Containing 2	P76	http://www.genecards.org/cgi-bin/carddisp.pl?gene=PLBD2
PMEL	Premelanosome Protein	P1, p100, ME20, SI, gp100, SIL, SILV, D12S53E, ME20-M, ME20M, PMEL17	http://www.genecards.org/cgi-bin/carddisp.pl?gene=PMEL
POLR2L	Polymerase (RNA) II Subunit L	RBP10, RPABC5, RPB10, RPB10beta, hRPB7.6, RPB7.6	http://www.genecards.org/cgi-bin/carddisp.pl?gene=POLR2L
PROS1	Protein S (Alpha)	PROS, PSA, PS21, PS22, PS23, PS24, PS25, THPH5, THPH6	http://www.genecards.org/cgi-bin/carddisp.pl?gene=PROS1
QPCT	Glutaminyl-Peptide Cyclotransferase	GCT, EC, QC, sQC	http://www.genecards.org/cgi-bin/carddisp.pl?gene=QPCT
RLBP1	Retinaldehyde Binding Protein 1	CRALBP	http://www.genecards.org/cgi-bin/carddisp.pl?gene=RLBP1
RRM2	Ribonucleotide Reductase Regulatory Subunit M2	R2, RR2M, RR2	http://www.genecards.org/cgi-bin/carddisp.pl?gene=RRM2
SCP2	Sterol Carrier Protein 2	NLTP, SCP-CHI, NSL-TP, SCP-2, SCP-X, SCPX	http://www.genecards.org/cgi-bin/carddisp.pl?gene=SCP2
SEC61A1	Sec61 Translocon Alpha 1 Subunit	HSEC61, SEC61, SEC61A	http://www.genecards.org/cgi-bin/carddisp.pl?gene=SEC61A1
SEMA6A	Semaphorin 6A	SemA, HT018, SEMA6A1, VIA, semaphorin-6A-1, SEMAQ, SEMA6A-1, KIAA1368	http://www.genecards.org/cgi-bin/carddisp.pl?gene=SEMA6A
SLC25A13	Solute Carrier Family 25 Member 13	CITRIN, CTLN2, ARALAR2	http://www.genecards.org/cgi-bin/carddisp.pl?gene=SLC25A13
SLC27A4	Solute Carrier Family 27 Member 4	IPS, ACSVL4, FATP4, FATP-4	http://www.genecards.org/cgi-bin/carddisp.pl?gene=SLC27A4
SMC2	Structural Maintenance Of Chromosomes 2	CAP-E, SMC2L1, CAPE, SMC-2, hCAP-E	http://www.genecards.org/cgi-bin/carddisp.pl?gene=SMC2
SMPDL3A	Sphingomyelin Phosphodiesterase Acid Like 3A	0610010C24Rik, ASM3A, ASML3a, yR36GH4.1	http://www.genecards.org/cgi-bin/carddisp.pl?gene=SMPDL3A
SPC24	SPC24, NDC80 Kinetochore Complex Component	SPBC24, hSpc24	http://www.genecards.org/cgi-bin/carddisp.pl?gene=SPC24
SRPRA	SRP Receptor Alpha Subunit	SRPR, Sralpha, DP-alpha, SR-alpha, SRP-alpha, DP	http://www.genecards.org/cgi-bin/carddisp.pl?gene=SRPRA
SUMF1	Sulfatase Modifying Factor 1	AAPA3037, UNQ3037, FGE	http://www.genecards.org/cgi-bin/carddisp.pl?gene=SUMF1
TFRC	Transferrin Receptor	TR, P90, T9, CD71, IMD46, TFR, TFR1, TRFR	http://www.genecards.org/cgi-bin/carddisp.pl?gene=TFRC
TMA7	Translation Machinery Associated 7 Homolog	CCDC72, HSPC016	http://www.genecards.org/cgi-bin/carddisp.pl?gene=TMA7
TPCN2	Two Pore Segment Channel 2	SHEP10, TPC2	http://www.genecards.org/cgi-bin/carddisp.pl?gene=TPCN2
TSPAN10	Tetraspanin 10	oculospanin, tspan-10, OCSP	http://www.genecards.org/cgi-bin/carddisp.pl?gene=TSPAN10
TTC17	Tetratricopeptide Repeat Domain 17		http://www.genecards.org/cgi-bin/carddisp.pl?gene=TTC17
TYRP1	Tyrosinase Related Protein 1	CAS2, TRP1, TRP, TRP-1, CATB, GP75, OCA3, b-PROTEIN, TYRP, TYRRP	http://www.genecards.org/cgi-bin/carddisp.pl?gene=TYRP1
USP13	Ubiquitin Specific Peptidase 13 (Isopeptidase T-3)	IsoT-3, ISOT3	http://www.genecards.org/cgi-bin/carddisp.pl?gene=USP13
ZNF384	Zinc Finger Protein 384	NP, CAGH1A, ERDA2, TNRC1, CAGH1, CIZ, NMP4	http://www.genecards.org/cgi-bin/carddisp.pl?gene=ZNF384

## Sheet: MeCoP down Pathways
GeneAnalytics - Pathway results
Copyright © LifeMap Sciences, Inc.
	MeCoP exposed to NK cells Vs Nil (proteins DOWN)
Statistics:
# Identified genes	76
# Matched genes	35
# Matched entities	22
Matching score statistics:
# High score matches	9
# Med score matches	13
# Low score matches	0
	The entities are assigned to wide functional categories identified by a color code (see also figure 5C):
	Response to immune cells
	Cell death
	Adhesion/Morphology/motility
	Oncogenic pathways
	Proliferation
	Response to stress
	Metabolism
	each entity can belong to 1 or more functional categories (i.e. color codes 1, 2, 3)
Results
Score	SuperPath Name	Color code 1	# SuperPath Total Genes	# SuperPath Matched Genes	Matched Genes (Symbols)	Evidence URL
23.4143	RB in Cancer		95	7	SMC2, MCM6, MCM3, PCNA, RRM2, CDK2, DHFR	http://pathcards.genecards.org/card/rb_in_cancer
20.191	Terpenoid Backbone Biosynthesis		44	5	HMGCS1, IDI1, FDPS, PCYOX1, CYP51A1	http://pathcards.genecards.org/card/terpenoid_backbone_biosynthesis
18.8436	E2F Mediated Regulation of DNA Replication		97	6	MCM6, MCM3, PCNA, RRM2, CDK2, DHFR	http://pathcards.genecards.org/card/e2f_mediated_regulation_of_dna_replication
15.2246	Peroxisome		90	5	ABCD1, ACSL3, HSD17B4, FAR1, SCP2	http://pathcards.genecards.org/card/peroxisome
15.101	Alpha-linolenic (omega3) and Linoleic (omega6) Acid Metabolism		15	3	ABCD1, HSD17B4, SCP2	http://pathcards.genecards.org/card/alpha-linolenic_(omega3)_and_linoleic_(omega6)_acid_metabolism
14.9343	Mitotic G1-G1/S Phases		157	6	MCM6, MCM3, PCNA, RRM2, CDK2, DHFR	http://pathcards.genecards.org/card/mitotic_g1-g1s_phases
14.7198	DNA Strand Elongation		48	4	FEN1, MCM6, MCM3, PCNA	http://pathcards.genecards.org/card/dna_strand_elongation
14.0488	Regulation of Cholesterol Biosynthesis By SREBP (SREBF)		107	5	HMGCS1, IDI1, FASN, FDPS, CYP51A1	http://pathcards.genecards.org/card/regulation_of_cholesterol_biosynthesis_by_srebp_(srebf)
13.4215	Metabolism		2472	22	ABCD1, ACSL3, PMEL, POLR2L, HMGCS1, HPGD, HSD17B4, IDI1, FAR1, FASN, FDPS, ALDH1B1, NDUFB5, ALG1, OAT, RRM2, SCP2, SLC25A13, SUMF1, TYRP1, CYP51A1, DHFR	http://pathcards.genecards.org/card/metabolism
12.759	Cell Cycle, Mitotic		634	10	SMC2, SPC24, FEN1, MCM6, MCM3, NCAPD2, PCNA, RRM2, CDK2, DHFR	http://pathcards.genecards.org/card/cell_cycle_mitotic
12.1601	Peroxisomal Lipid Metabolism		30	3	ABCD1, HSD17B4, SCP2	http://pathcards.genecards.org/card/peroxisomal_lipid_metabolism
12.1095	P53 Pathway (RnD)		143	5	FAS, FASN, PCNA, CDK2, CTSD	http://pathcards.genecards.org/card/p53_pathway_(rnd)
11.77	E2F Transcription Factor Network		82	4	MCM3, RRM2, CDK2, DHFR	http://pathcards.genecards.org/card/e2f_transcription_factor_network
11.5791	Direct P53 Effectors		155	5	FAS, FASN, PCNA, TYRP1, CTSD	http://pathcards.genecards.org/card/direct_p53_effectors
10.3729	Cell Cycle Control of Chromosomal Replication		46	3	MCM6, MCM3, CDK2	http://pathcards.genecards.org/card/cell_cycle_control_of_chromosomal_replication
10.1901	P53 Signaling Pathway		110	4	FAS, FASN, RRM2, CDK2	http://pathcards.genecards.org/card/p53_signaling_pathway
9.74441	Fatty Acid Biosynthesis (KEGG)		13	2	ACSL3, FASN	http://pathcards.genecards.org/card/fatty_acid_biosynthesis_(kegg)
8.83643	DREAM Repression and Dynorphin Expression		238	5	FAS, FASN, ITGA7, CAPN5, CDK2	http://pathcards.genecards.org/card/dream_repression_and_dynorphin_expression
8.82756	Fatty Acid Metabolism		67	3	ACSL3, FASN, ALDH1B1	http://pathcards.genecards.org/card/fatty_acid_metabolism
8.82315	SREBF and MiR33 in Cholesterol and Lipid Homeostasis		18	2	HMGCS1, FASN	http://pathcards.genecards.org/card/srebf_and_mir33_in_cholesterol_and_lipid_homeostasis
8.67069	Bisphosphonate Pathway, Pharmacodynamics		19	2	HMGCS1, FDPS	http://pathcards.genecards.org/card/bisphosphonate_pathway_pharmacodynamics
8.46266	Cell Cycle		153	4	MCM6, MCM3, PCNA, CDK2	http://pathcards.genecards.org/card/cell_cycle

## Sheet: MeCoP down GO BP
GeneAnalytics - Function-based Analysis, GO-Biological Process results
Copyright © LifeMap Sciences, Inc.
	MeCoP exposed to NK cells Vs Nil (proteins DOWN)
Statistics:
# Identified genes	76
# Matched genes	35
# Matched entities	20
Matching score statistics:
# High score matches	11
# Med score matches	9
# Low score matches	0
	The entities are assigned to wide functional categories identified by a color code (see also figure 5C):
	Response to immune cells
	Cell death
	Adhesion/Morphology/motility
	Oncogenic pathways
	Proliferation
	Response to stress
	Metabolism
	each entity can belong to 1 or more functional categories (i.e. color codes 1, 2, 3)
Results
Score	Name	Color code 1	# Genes	# Matched Genes	Matched Genes (Symbols)	Evidence URL
17.676	Mitotic Cell Cycle		423	10	SMC2, SPC24, FEN1, MCM6, MCM3, NCAPD2, PCNA, RRM2, CDK2, DHFR	http://amigo.geneontology.org/amigo/term/GO:0000278
17.3821	Cellular Lipid Metabolic Process		179	7	ABCD1, ACSL3, HMGCS1, HSD17B4, FAR1, FASN, SCP2	http://amigo.geneontology.org/amigo/term/GO:0044255
16.82	DNA Strand Elongation Involved in DNA Replication		33	4	FEN1, MCM6, MCM3, PCNA	http://amigo.geneontology.org/amigo/term/GO:0006271
16.627	Oxidation-reduction Process		681	12	HPGD, HSD17B4, FAM213A, FAR1, FASN, ALDH1B1, PCYOX1, RRM2, SUMF1, TYRP1, CYP51A1, DHFR	http://amigo.geneontology.org/amigo/term/GO:0055114
16.4277	Fatty Acid Beta-oxidation Using Acyl-CoA Oxidase		11	3	ABCD1, HSD17B4, SCP2	http://amigo.geneontology.org/amigo/term/GO:0033540
16.0266	Cholesterol Biosynthetic Process		38	4	HMGCS1, IDI1, FDPS, CYP51A1	http://amigo.geneontology.org/amigo/term/GO:0006695
15.9392	Small Molecule Metabolic Process		1551	18	ABCD1, ACSL3, HMGCS1, HPGD, HSD17B4, IDI1, FAR1, FASN, FDPS, ALDH1B1, NDUFB5, OAT, RRM2, SCP2, SLC25A13, SUMF1, CYP51A1, DHFR	http://amigo.geneontology.org/amigo/term/GO:0044281
15.7125	Unsaturated Fatty Acid Metabolic Process		13	3	ABCD1, HSD17B4, SCP2	http://amigo.geneontology.org/amigo/term/GO:0033559
15.7125	Alpha-linolenic Acid Metabolic Process		13	3	ABCD1, HSD17B4, SCP2	http://amigo.geneontology.org/amigo/term/GO:0036109
15.101	Isoprenoid Biosynthetic Process		15	3	HMGCS1, IDI1, FDPS	http://amigo.geneontology.org/amigo/term/GO:0008299
15.0884	G1/S Transition of Mitotic Cell Cycle		154	6	MCM6, MCM3, PCNA, RRM2, CDK2, DHFR	http://amigo.geneontology.org/amigo/term/GO:0000082
13.1023	Regulation of Transcription Involved in G1/S Transition of Mitotic Cell Cycle		24	3	PCNA, RRM2, DHFR	http://amigo.geneontology.org/amigo/term/GO:0000083
12.473	Meiotic Chromosome Condensation		5	2	SMC2, NCAPD2	http://amigo.geneontology.org/amigo/term/GO:0010032
11.9505	Very Long-chain Fatty Acid Catabolic Process		6	2	ABCD1, SLC27A4	http://amigo.geneontology.org/amigo/term/GO:0042760
11.8828	DNA Replication		148	5	FEN1, MCM6, MCM3, RRM2, CDK2	http://amigo.geneontology.org/amigo/term/GO:0006260
11.5093	Long-chain Fatty Acid Import		7	2	ACSL3, SLC27A4	http://amigo.geneontology.org/amigo/term/GO:0044539
11.3704	Metabolic Process		1151	13	ACSL3, HMGCS1, HPGD, HSD17B4, FASN, MBLAC2, MDN1, MYO10, ALDH1B1, ALG1, SCP2, SLC27A4, TYRP1	http://amigo.geneontology.org/amigo/term/GO:0008152
9.97181	Mitotic Chromosome Condensation		12	2	SMC2, NCAPD2	http://amigo.geneontology.org/amigo/term/GO:0007076
9.74441	Melanin Biosynthetic Process		13	2	PMEL, TYRP1	http://amigo.geneontology.org/amigo/term/GO:0042438
8.98453	Very Long-chain Fatty Acid Metabolic Process		17	2	HSD17B4, SLC27A4	http://amigo.geneontology.org/amigo/term/GO:0000038
